# Supplementary material for: Diet modulates the therapeutic effects of dimethyl fumarate mediated by the immunometabolic neutrophil receptor HCAR2
Source: eLife journal article supplement (doi:10.7554/elife.98970), 2025-04-23
Supplement: supp [file elife-98970-supp-v1.zip]

## Sheet: Supplementary File 2
LA diet vs. HFb diet
Lipid species	Fold change (FC)	log2(FC)	p-value (FDR adjusted)
LPC 10:0	23.184	4.5351	2.5886e-05		Abbreviation	Lipid class
CAR 12:0	22.629	4.5001	2.6255e-06		CAR	Acylcarnitines
LPC 12:0	118.54	6.8893	2.3967e-05		CE	Cholesterylester
CAR 14:0	5.6918	2.5089	8.2304e-06		Cer	Ceramides
CE 14:0	29.031	4.8595	6.2441e-10		CL	Cardiolipin
LPC 14:0	10.404	3.3791	1.4993e-07		CoQ	Coenzym Q
CAR 16:0	1.2257	0.29356	0.13464		DLCL	Dilysocardiolipin
LPC O-16:0	1.6622	0.73312	0.0083138		FA	(Free) Fatty acid
LPE 16:0	1.4209	0.50676	0.069923		HexCer	Hexosylceramide/Cerebroside
CE 17:0	1.1318	0.17862	0.17232		LNAPE	N-acyl lysophosphatidylethanolamine
LPC 17:0	0.98138	-0.02711	0.89575		LPC	Lysophosphatidylcholine
LPE 17:0	0.78686	-0.34581	0.38255		LPC O	Ether-linked lysophosphatidylcholine/plasmalogen LPC
CAR 18:0	1.08	0.11107	0.50426		LPE	Lysophosphatidylethanolamine
LPC 18:0	1.439	0.52508	0.00055433		LPE O	Ether-linked lysophosphatidylethanolamine/plasmalogen LPE
LPC O-18:0	1.9623	0.97254	0.00028288		LPI	Lysophosphatidylinositol
LPE 18:0	1.3016	0.38032	0.022677		LPS	Lysophosphatidylserine
LPI 18:0	1.4236	0.50951	0.16818		PA	Phosphatidic acid
LPC O-19:0	1.4967	0.58182	0.0099355		PC	Phosphatidylcholine
CAR 20:0	2.1102	1.0774	0.0028371		PC O	Ether-linked phosphatidylcholine/Plasmalogen PC
FA 20:0	1.5463	0.62883	0.013195		PE	Phosphatidylethanolamine
LPC 20:0	2.0286	1.0205	0.001027		PE O	Ether-linked phosphatidylethanolamine/Plasmalogen PE
LPC O-20:0	2.1154	1.0809	0.00027522		PG	Phosphatidylglycerol
LPC 21:0	2.3191	1.2136	1.6743e-05		PI	Phosphatidylinositol
CAR 22:0	0.93087	-0.10335	0.57779		PS	Phosphatidylserine
LPC 22:0	1.561	0.64244	0.0026754		SE	Steryl ester
LPC O-22:0	1.9837	0.98822	0.00010687		SL	Sulfonolipid
PC 22:0	59.433	5.8932	7.817e-06		SM	Sphingomyelin
CAR 24:0	1.1423	0.19198	0.35238		ST	Cholesterol sulfate
LPC 24:0	1.9502	0.96363	5.9763e-05		TG	Triacylglyceride
PC 12:0_12:0	170.01	7.4095	1.2248e-06		TG O	Ether-linked triacylglyceride
PC 26:0	281.86	8.1388	1.6013e-05
PC O-26:0	22.657	4.5019	4.0943e-09		Lipid species are represented either as sum composition (carbons and double bonds), or if possible/unambiguous with the composition of acyl chains.
PC 27:0	76.357	6.2547	5.853e-06
LNAPE 28:0	33.315	5.0581	1.6367e-06
PC 28:0	68.729	6.1028	1.1061e-06
PC O-28:0	24.886	4.6373	1.1546e-10
PI 12:0_16:0	66.214	6.0491	4.749e-06
SM 28:0;2O	53.114	5.731	8.4195e-08
PC 29:0	19.355	4.2747	2.1314e-07
HexCer 18:0;3O/12:0;(2OH)	63.997	5.9999	1.7699e-07
PC 30:0	11.171	3.4817	4.1476e-08
PC O-30:0	6.0944	2.6075	2.0522e-08
PE 30:0	78.048	6.2863	1.1447e-06
PG 14:0_16:0	18.069	4.1754	4.2227e-05
PI 14:0_16:0	19.483	4.2842	6.4393e-06
SM 30:0;2O	31.065	4.9572	5.5662e-09
PC 31:0	1.2126	0.27814	0.037101
Cer 18:0;3O/14:0;(2OH)	41.25	5.3663	2.0951e-07
HexCer 18:0;3O/14:0;(2OH)	59.739	5.9006	4.4394e-09
LNAPE 32:0	10.776	3.4298	5.978e-08
PC 32:0	0.86569	-0.20807	0.23135
PC O-32:0	1.1171	0.15977	0.3457
PI 16:0_16:0	6.2782	2.6504	0.00036914
SM 32:0;2O	10.19	3.3492	4.4394e-09
TG 32:0	306.14	8.258	0.00035979
PC 33:0	1.1266	0.172	0.35238
Cer 18:0;2O/16:0	3.6105	1.8522	0.00018859
Cer 18:0;3O/16:0;(2OH)	4.2248	2.0789	7.6879e-07
Cer 18:0;3O/16:0	4.5019	2.1705	0.001277
HexCer 18:0;3O/16:0;(2OH)	4.392	2.1349	6.1753e-08
LNAPE 16:0/N-18:0	0.75822	-0.39931	0.0074371
PC 34:0	1.0379	0.053668	0.79854
PC O-34:0	1.2594	0.33275	0.037523
PE 34:0	1.2198	0.2866	0.18309
PE O-18:0_16:0	0.60298	-0.72983	0.0019743
SM 34:0;2O	1.4871	0.57254	0.0012191
TG 34:0	543.35	9.0857	6.8287e-05
TG 35:0	123.17	6.9445	0.00093283
LNAPE 36:0	1.1028	0.14121	0.40144
PC 36:0	1.2045	0.26849	0.28454
PC O-36:0	0.58903	-0.76358	0.0012061
TG 36:0	858.98	9.7465	2.7924e-05
LNAPE 18:0/N-20:0	1.0311	0.044183	0.82972
TG 37:0	161.35	7.334	8.7046e-05
Cer 18:0;3O/20:0	3.7962	1.9245	0.00012818
PC O-38:0	0.86013	-0.21737	0.34109
SM 38:0;2O	1.8511	0.88837	0.00021039
TG 38:0	756.61	9.5634	9.6951e-06
Cer 18:0;3O/21:0	3.8596	1.9484	0.00094718
PC 39:0	0.78844	-0.34292	0.31015
TG 39:0	237.38	7.8911	0.00047905
Cer 18:0;2O/22:0	2.5801	1.3674	0.016719
Cer 18:0;3O/22:0;(2OH)	2.4857	1.3137	1.317e-05
Cer 18:0;3O/22:0	1.9058	0.93041	0.0087659
HexCer 18:0;3O/22:0;(2OH)	2.6026	1.38	4.5018e-05
PC 40:0	1.2196	0.28638	0.20025
SM 40:0;2O	1.0568	0.079654	0.64941
SM 40:0;3O	0.67574	-0.56546	0.0031974
TG 40:0	379.65	8.5685	2.6103e-05
Cer 18:0;2O/23:0	12.437	3.6366	0.0012573
Cer 18:0;3O/23:0;(2OH)	5.4551	2.4476	8.0605e-08
HexCer 18:0;3O/23:0;(2OH)	4.6479	2.2166	1.3309e-08
SM 41:0;2O	1.9924	0.99451	0.0071894
SM 41:0;3O	1.3248	0.40576	0.022677
TG 41:0	44.961	5.4906	0.0095675
Cer 18:0;2O/24:0	5.3714	2.4253	0.0064943
Cer 18:0;3O/24:0;(2OH)	3.4535	1.7881	3.9454e-07
Cer 18:0;3O/24:0	3.4516	1.7873	0.0024385
HexCer 18:0;3O/24:0;(2OH)	3.1614	1.6606	1.1447e-06
SM 42:0;2O	1.1971	0.2596	0.30917
SM 42:0;3O	0.83218	-0.26503	0.23252
TG 42:0	168.35	7.3954	1.2464e-05
Cer 18:0;2O/25:0	8.5174	3.0904	0.0058785
Cer 18:0;3O/25:0	3.8327	1.9384	0.0051273
TG 43:0	40.517	5.3405	0.00041163
Cer 20:0;3O/24:0	2.2869	1.1934	0.0075454
TG 44:0	71.516	6.1602	7.3696e-06
TG 46:0	31.951	4.9978	1.5863e-05
TG O-46:0	102.54	6.6801	0.022747
TG 48:0	8.0329	3.0059	0.00014021
TG O-48:0	39.341	5.2979	0.02413
TG 50:0	4.6504	2.2173	0.0017843
TG O-50:0	11.228	3.489	0.020443
TG 52:0	3.1259	1.6443	0.0075649
TG O-52:0	4.3517	2.1216	0.02413
TG 54:0	1.9941	0.99576	0.022621
CAR 14:1	1.9913	0.99368	0.013159
LPC 14:1	13.551	3.7603	4.5775e-06
CAR 16:1	1.5981	0.67632	0.076722
LPC 16:1	4.4303	2.1474	1.123e-05
LPC O-16:1	0.94584	-0.080328	0.72739
LPE O-16:1	1.2738	0.34909	0.087346
LPC 17:1	5.0746	2.3433	2.8367e-06
CAR 18:1	0.7781	-0.36196	0.37213
FA 18:1	1.7927	0.84217	0.022203
LPC 18:1	1.6896	0.75671	0.001701
LPC O-18:1	1.4067	0.49232	0.078703
LPE 18:1	2.0363	1.026	0.00012042
LPE O-18:1	1.1424	0.19212	0.37213
LPI 18:1	7.8602	2.9746	1.2248e-06
LPC 19:1	2.6685	1.416	0.00015
CE 20:1	2.3429	1.2283	9.4646e-05
LPC 21:1	6.0847	2.6052	8.4904e-06
LPC 22:1	2.4015	1.2639	1.9029e-05
LPC O-22:1	2.3846	1.2538	0.00092011
CAR 24:1	2.2297	1.1569	2.535e-06
LPC 24:1	2.1261	1.0882	0.00082754
LPC O-24:1	1.8963	0.92318	0.00012854
PC O-25:1	1.3135	0.39346	0.019858
LPC 26:1	2.5091	1.3271	2.7004e-06
PC 26:1	53.401	5.7388	1.2444e-07
ST 27:1;O;S	1.454	0.53999	8.7046e-05
PC 28:1	80.697	6.3344	5.2501e-07
SM 28:1;2O	16.506	4.0449	2.2188e-07
ST 28:1;O;S	0.30469	-1.7146	6.0062e-08
PC 29:1	42.422	5.4068	8.747e-07
SM 29:1;2O	11.859	3.5679	2.8161e-08
ST 29:1;O;S	0.40968	-1.2874	4.1583e-05
PC 30:1	32.066	5.003	2.1314e-07
PE 30:1	9.8499	3.3001	3.3718e-06
PI 16:0_14:1	36.425	5.1869	8.851e-06
SM 30:1;2O	18.363	4.1987	2.1703e-08
PC 31:1	13.404	3.7446	4.5837e-09
SM 31:1;2O	5.5018	2.4599	2.7105e-08
Cer 18:1;2O/14:0	28.869	4.8514	2.56e-06
HexCer 18:1;2O/14:0	15.545	3.9584	4.0907e-10
PC 32:1	13.294	3.7327	4.0943e-09
PC O-32:1	2.1008	1.0709	1.8907e-05
PE 32:1	29.376	4.8766	0.00077392
PG 14:0_18:1	5.1324	2.3596	8.6263e-05
PI 32:1	33.641	5.0722	3.3318e-06
SM 32:1;2O	4.7516	2.2484	7.4367e-08
SM 32:1;3O	2.9134	1.5427	6.1909e-06
PC 33:1	5.5138	2.463	2.8364e-09
SL 17:0;O/16:1	6.4479	2.6888	0.0016351
SL 17:0;O/16:1;O	11.433	3.5151	0.00023117
SM 33:1;2O	1.1698	0.2262	0.070371
SM 33:1;3O	0.71852	-0.47691	0.035804
Cer 18:1;2O/16:0	2.3839	1.2533	0.00043597
HexCer 18:1;2O/16:0	3.0228	1.5959	0.00018887
LNAPE 16:1/N-18:0	10.262	3.3593	1.1546e-10
PC 34:1	2.6229	1.3911	1.1289e-09
PC O-34:1	1.0648	0.09058	0.63775
PE 34:1	4.2451	2.0858	2.8367e-06
PE O-18:1_16:0	0.95489	-0.066591	0.78007
PI 34:1	14.485	3.8565	1.6013e-05
SM 34:1;2O	1.1548	0.20763	0.086265
SM 34:1;3O	1.4423	0.52834	0.0052535
PC 35:1	4.2608	2.0911	4.9048e-09
PC O-35:1	1.5594	0.64096	0.014259
SM 35:1;2O	0.86876	-0.20298	0.17077
LNAPE 18:1/N-18:0	3.0887	1.627	3.4568e-08
PC 18:0_18:1	5.8497	2.5484	2.1292e-10
PC O-36:1	2.1809	1.1249	7.7176e-06
PE 18:0_18:1	1.6796	0.7481	0.0092224
PI 18:0_18:1	5.7984	2.5357	9.8466e-07
SM 36:1;2O	1.1125	0.15385	0.47577
PC 37:1	5.0902	2.3477	1.0254e-06
PC O-37:1	2.8497	1.5108	0.0030722
SM 37:1;2O	1.4017	0.48716	0.022698
Cer 18:1;2O/20:0	2.9799	1.5753	1.5357e-05
HexCer 18:1;2O/20:0	2.4805	1.3106	4.749e-06
LNAPE 18:1/N-20:0	5.4974	2.4588	4.0943e-09
PC 38:1	7.3543	2.8786	2.5243e-07
PC O-38:1	3.5989	1.8475	0.00063006
PE O-20:0_18:1	1.8679	0.90143	1.1313e-05
SM 38:1;2O	1.1787	0.23718	0.13168
TG 38:1	75.974	6.2474	1.9078e-05
LNAPE 18:1/N-21:0	4.8231	2.27	1.1077e-07
PC 39:1	7.4524	2.8977	6.2907e-07
SM 39:1;2O	1.1593	0.21321	0.17612
Cer 18:1;2O/22:0	1.3412	0.42355	0.19043
Cer 18:0;3O/22:1	6.5015	2.7008	7.2604e-07
HexCer 18:1;2O/22:0	1.9501	0.96351	0.0046127
LNAPE 20:1/N-20:0	7.5826	2.9227	6.8033e-08
PC 18:1_22:0	2.6098	1.3839	1.5266e-05
PC O-40:1	2.113	1.0793	7.6562e-05
SM 40:1;2O	0.94697	-0.078606	0.58612
HexCer 18:1;2O/23:0	4.5923	2.1992	1.317e-05
PC O-41:1	3.8247	1.9353	2.7956e-05
SM 41:1;2O	1.2047	0.2687	0.034858
TG 41:1	66.792	6.0616	0.00011773
Cer 18:0;2O/24:1	7.8514	2.973	0.0015119
Cer 18:1;2O/24:0	1.5679	0.64886	0.04002
Cer 18:0;3O/24:1;(2OH)	5.2859	2.4022	2.184e-07
HexCer 18:1;2O/24:0	1.8	0.84802	0.00026745
PC 24:0_18:1	2.4452	1.2899	2.9425e-05
SM 42:1;2O	0.94448	-0.082407	0.60981
SM 42:1;3O	1.7599	0.81551	5.8218e-05
TG 42:1	27.969	4.8057	1.2361e-06
SM 43:1;2O	1.5805	0.66039	0.055978
TG 43:1	21.421	4.4209	0.000766
SM 44:1;2O	2.1339	1.0935	1.7995e-05
TG 44:1	59.282	5.8895	3.4107e-05
TG 45:1	16.846	4.0743	0.0008291
TG 46:1	31.383	4.9719	4.4555e-05
TG 47:1	13.599	3.7655	0.00018219
TG 48:1	22.922	4.5187	3.5982e-05
TG O-48:1	49.875	5.6403	0.025619
TG 49:1	7.0786	2.8235	0.00028642
TG 50:1	0.79742	-0.32659	0.02733
TG O-50:1	10.023	3.3252	0.029677
TG 51:1	5.5804	2.4804	0.0014322
TG 16:0_17:0_18:1	5.5804	2.4804	0.0014322
TG 52:1	4.284	2.099	0.0016605
TG 53:1	3.2254	1.6895	0.005775
TG 54:1	2.2889	1.1947	0.030246
TG O-54:1	1.9132	0.936	0.15293
TG 55:1	2.1873	1.1291	0.033254
TG 56:1	1.0218	0.03109	0.94645
TG O-56:1	0.86494	-0.20932	0.73101
TG 57:1	1.7845	0.83553	0.047038
TG 58:1	1.2966	0.37475	0.41911
TG O-22:0_18:0_18:1	1.1856	0.24564	0.62951
TG 59:1	1.7877	0.83809	0.12612
TG 60:1	3.7324	1.9001	0.0060426
TG 61:1	3.2558	1.703	0.0054577
TG 64:1	7.7033	2.9455	0.0028805
TG 68:1	5.724	2.517	0.0029985
CAR 14:2	0.60179	-0.73267	0.0085993
CAR 16:2	0.48353	-1.0483	0.010293
LPC 17:2	4.2688	2.0938	9.8053e-06
FA 18:2	0.19425	-2.364	0.0017826
LPC 18:2	2.1485	1.1033	0.00055433
LPE 18:2	1.1732	0.23048	0.2459
LPI 18:2	0.93267	-0.10057	0.74147
LPC 20:2	3.7394	1.9028	0.00019092
LNAPE 22:2	15.688	3.9715	1.3992e-06
LPC 22:2	2.551	1.3511	0.00435
LPC O-24:2	0.36025	-1.4729	2.1772e-06
LPC 26:2	1.942	0.95757	0.0015684
PC 28:2	10.634	3.4106	3.9289e-05
ST 28:2;O;S	0.11971	-3.0624	9.1379e-10
PC 30:2	9.7841	3.2904	1.8249e-06
SM 30:2;2O	17.849	4.1578	2.4823e-08
PC 32:2	4.8281	2.2715	6.6737e-07
PC O-32:2	1.226	0.29401	0.03577
PE 32:2	13.11	3.7126	3.5982e-05
PI 14:0_18:2	8.6345	3.1101	6.2907e-07
SM 32:2;2O	5.1087	2.3529	1.3293e-06
PC 33:2	1.1124	0.15372	0.41736
LNAPE 34:2	5.0298	2.3305	2.139e-06
PC 34:2	1.1651	0.22048	0.066155
PC O-34:2	0.41467	-1.27	5.2778e-05
PE 34:2	1.2818	0.35812	0.11415
PE 16:1_18:1	13.932	3.8004	7.5462e-07
PE O-16:0_18:2	0.26398	-1.9215	0.00011492
PE O-16:1_18:1	1.8216	0.86524	2.7813e-05
PG 16:0_18:2	1.0767	0.10659	0.7238
PG 16:0_18:2.1	0.59476	-0.74963	0.0030765
PI 16:1_18:1	1.0399	0.056485	0.81413
SM 34:2;2O	1.25	0.32188	0.041852
SM 34:2;3O	1.4518	0.53787	0.0065812
PC 17:0_18:2	1.2422	0.31285	0.17141
PC O-35:2	0.33925	-1.5596	0.00013683
PE 17:0_18:2	0.58496	-0.77358	0.043895
SM 35:2;2O	0.98186	-0.026415	0.85826
PC 18:0_18:2	1.199	0.2618	0.0074072
PC 18:1_18:1	4.7435	2.2459	3.5825e-08
PC O-18:0_18:2	0.50295	-0.99151	9.8876e-05
PC O-18:1_18:1	1.5076	0.59222	0.015596
PE 18:0_18:2	1.0354	0.050168	0.84838
PE 18:1_18:1	1.2085	0.2732	0.15565
PG 18:0_18:2	0.60341	-0.72878	0.0046741
PG 18:1_18:1	3.2981	1.7216	0.0028296
PI 18:0_18:2	0.60108	-0.73437	0.012021
PI 18:1_18:1	6.5859	2.7194	4.0579e-08
PS 36:2	0.64998	-0.62152	0.26171
SM 36:2;2O	1.1923	0.25375	0.23597
PC 37:2	1.1794	0.23805	0.29676
PE O-19:0_18:2	0.35707	-1.4857	1.7014e-06
LNAPE 18:1/N-20:1	4.2798	2.0975	2.1703e-08
LNAPE 18:2/N-20:0	0.92558	-0.11157	0.24729
PC 38:2	6.3066	2.6569	4.7198e-06
PC O-38:2	0.69876	-0.51713	0.019858
PE O-20:1_18:1	2.7785	1.4743	3.0996e-05
PI 18:0_20:2	57.528	5.8462	9.6406e-07
LNAPE 18:2/N-21:0	1.1823	0.2416	0.30171
PC 39:2	3.3688	1.7522	1.7699e-07
Cer 18:2;2O/22:0	0.96187	-0.056082	0.82812
HexCer 18:1;2O/22:1	5.844	2.5469	4.0943e-09
LNAPE 20:2/N-20:0	5.3916	2.4307	4.2231e-05
PC 18:2_22:0	0.89962	-0.15262	0.46404
PC O-18:1_22:1	1.9642	0.97397	0.02413
PC O-18:2_22:0	1.0201	0.028727	0.91682
SM 40:2;2O	3.3359	1.7381	2.7105e-08
SM 40:2;2O.1	0.61907	-0.69182	0.00027522
TG 40:2	8.0507	3.0091	0.000766
PC 41:2	1.3809	0.46559	0.028761
SM 41:2;2O	1.1538	0.20634	0.16628
SM 41:2;2O.1	1.6269	0.70216	0.00056857
TG 41:2	7.2003	2.8481	0.000766
Cer 18:1;2O/24:1	4.3092	2.1074	0.00019468
HexCer 18:1;2O/24:1	3.6864	1.8822	1.8716e-06
PC 18:2_24:0	1.1299	0.17622	0.39029
PC 42:2	3.4466	1.7852	5.1564e-07
SM 42:2;2O	1.7677	0.82184	0.00012336
TG 42:2	11.478	3.5208	0.00022555
SM 43:2;2O	1.9956	0.99685	4.9746e-05
TG 43:2	5.7522	2.5241	0.0028024
SM 44:2;2O	2.9497	1.5606	5.2501e-07
TG 44:2	5.7937	2.5345	0.00063735
TG 45:2	3.4813	1.7996	0.0043328
SE 28:1/18:1	0.4633	-1.11	3.5982e-05
TG 47:2	4.782	2.2576	0.0030028
TG 50:2	4.7864	2.259	5.269e-07
TG O-50:2	1.8879	0.91679	0.11947
TG 51:2	4.4312	2.1477	0.00032188
TG 53:2	4.697	2.2317	0.00040732
TG O-18:0_16:0_18:2	0.54078	-0.88689	0.15674
TG 54:2	3.1696	1.6643	0.00048113
TG O-54:2	0.63309	-0.65952	0.25002
TG 55:2	1.8672	0.90084	0.033785
TG 56:2	2.1001	1.0705	0.030776
TG O-56:2	0.71692	-0.48011	0.41052
TG 57:2	0.92987	-0.10489	0.82972
TG 58:2	0.53815	-0.89393	0.11756
TG 59:2	0.72296	-0.46802	0.29613
TG 60:2	0.59292	-0.75409	0.14356
TG O-60:2	0.63255	-0.66074	0.21611
TG 61:2	1.4225	0.50845	0.27604
TG 62:2	2.7509	1.4599	0.0093214
TG 64:2	4.6915	2.2301	0.0032685
TG 66:2	7.9444	2.9899	0.0013865
TG 68:2	7.0196	2.8114	0.0020948
TG 70:2	6.3992	2.6779	0.0008291
CE 18:3	2.6127	1.3856	4.5777e-05
LPC 18:3	1.9459	0.96047	0.00029776
LPC 20:3	6.1552	2.6218	4.2675e-07
LPI 20:3	14.665	3.8743	1.7758e-05
LPC 22:3	8.3078	3.0545	8.6263e-05
CE 24:3	6.3024	2.6559	0.00011483
LPC 24:3	9.7244	3.2816	0.00050747
PC 32:3	7.4767	2.9024	5.9198e-05
PC O-32:3	0.58389	-0.77622	0.025059
PC 33:3	1.4984	0.58342	0.03676
PC 34:3	1.0569	0.079772	0.55299
PC 16:0_18:3	1.7257	0.78718	0.00012336
PC O-34:3	0.25188	-1.9892	3.0776e-05
PE O-16:1_18:2	0.40932	-1.2887	6.0617e-05
PC 17:1_18:2	0.81945	-0.28728	0.13509
DLCL 18:1_18:2	1.2455	0.31668	0.087928
PC 16:0_20:3	18.15	4.1819	8.4858e-05
PC 18:1_18:2	0.95692	-0.063533	0.61612
PC O-16:0_20:3	6.4971	2.6998	2.7835e-06
PC O-18:1_18:2	0.43728	-1.1934	0.00029404
PE 18:1_18:2	0.5954	-0.74806	0.0026989
PE O-18:1_18:2	0.44274	-1.1755	2.7835e-06
PE O-18:2_18:1	2.3694	1.2445	4.3584e-06
PG 18:1_18:2	0.51251	-0.96434	0.0097963
PI 16:0_20:3	80.93	6.3386	6.2907e-07
PI 18:1_18:2	0.29008	-1.7855	1.458e-05
SM 36:3;2O	0.53169	-0.91134	0.00045118
PC 38:3	3.3513	1.7447	3.8733e-09
PC O-16:0_22:3	3.0302	1.5994	1.1117e-05
PC O-18:0_20:3	6.4699	2.6937	3.4865e-06
PI 18:0_20:3	61.306	5.938	2.139e-06
PC 39:3	4.5137	2.1743	9.9335e-08
PC O-39:3	6.1889	2.6297	1.5357e-05
PC 18:0_22:3	7.8217	2.9675	3.7414e-08
PC 18:2_22:1	1.9392	0.95549	0.00063735
PC 20:0_20:3	16.694	4.0613	2.1141e-08
TG 40:3	23.667	4.5648	0.000259
SM 41:3;2O	0.48324	-1.0492	0.00013683
Cer 18:2;2O/24:1	1.282	0.35839	0.074934
HexCer 18:1;2O/24:2	4.5355	2.1813	1.317e-05
PC 42:3	1.8478	0.88579	0.00035203
PC O-42:3	0.89141	-0.16583	0.4914
SM 42:3;2O	0.74206	-0.43039	0.019648
SM 42:3;3O	0.89938	-0.153	0.52498
SM 43:3;2O	2.4559	1.2963	0.087595
SM 44:3;2O	1.7256	0.78708	0.0029163
TG 44:3	16.429	4.0382	5.3626e-05
TG 46:3	1.9072	0.93145	0.063498
SE 29:1/18:2	0.47103	-1.0861	4.624e-06
TG 47:3	1.532	0.6154	0.13168
TG 49:3	2.1967	1.1353	0.023422
TG 50:3	2.5683	1.3608	0.00058133
TG 51:3	1.0874	0.12086	0.72959
TG 53:3	1.577	0.65721	0.045051
TG 54:3	1.0916	0.12645	0.49712
TG 55:3	2.7307	1.4493	0.00035361
TG 56:3	3.1022	1.6333	7.305e-05
TG 57:3	0.68558	-0.54461	0.20156
TG 58:3	0.40815	-1.2928	0.013169
TG O-58:3	0.34239	-1.5463	0.032551
TG 18:1_18:2_23:0	0.33005	-1.5992	0.0095675
TG 60:3	0.12674	-2.98	0.001032
TG 61:3	0.3946	-1.3415	0.041236
TG 62:3	0.71076	-0.49257	0.35036
TG 64:3	1.683	0.75105	0.11558
TG 68:3	2.7863	1.4783	0.0097215
TG 70:3	3.2485	1.6998	0.0017191
FA 20:4	0.85422	-0.22732	0.61589
LPE 20:4	1.7527	0.80956	0.0017027
LPC 22:4	0.57295	-0.80353	0.00063735
CE 24:4	0.069829	-3.84	8.0605e-08
LPC 24:4	0.63807	-0.64822	0.033347
PC 32:4	20.177	4.3346	8.5796e-07
PC 34:4	4.2108	2.0741	7.2075e-06
PC O-34:4	1.889	0.91759	0.00077915
PE 14:0_20:4	19.31	4.2712	3.7526e-08
PI 14:0_20:4	13.99	3.8063	2.8367e-06
PC 35:4	0.76448	-0.38745	0.076659
DLCL 18:2_18:2	0.28544	-1.8087	9.4404e-05
PC 16:0_20:4	0.8037	-0.31527	0.13168
PC 18:2_18:2	0.75083	-0.41345	0.016617
PC O-36:4	0.73485	-0.44448	0.017662
PE 16:0_20:4	1.5241	0.60793	0.0048419
PE O-16:1_20:3	11.555	3.5305	5.269e-07
PE O-18:2_18:2	0.80458	-0.31369	0.013246
PG 18:2_18:2	0.21967	-2.1866	1.7195e-05
PI 16:0_20:4	1.2071	0.2716	0.20455
PI 18:2_18:2	0.13432	-2.8963	5.1204e-07
PC 17:0_20:4	0.73464	-0.4449	0.018736
PC 37:4	0.36767	-1.4435	4.876e-07
PI 17:0_20:4	0.58135	-0.78252	0.0007733
PC 16:0_22:4	1.9299	0.94851	0.00021913
PC 18:0_20:4	0.64046	-0.64283	0.0064943
PC 18:1_20:3	1.5476	0.63006	0.062049
PC O-38:4	0.90575	-0.14282	0.48479
PC O-18:0_20:4	1.1339	0.18124	0.61222
PE 38:4	1.0367	0.052022	0.73457
PE O-38:4	0.3367	-1.5705	8.0605e-08
PI 18:0_20:4	0.78689	-0.34577	0.055784
PI 18:1_20:3	27.942	4.8043	3.7514e-06
PS 38:4	0.65517	-0.61006	0.2156
PC 19:0_20:4	0.69669	-0.52141	0.082799
PC 18:0_22:4	0.89795	-0.15529	0.51404
PC 20:0_20:4	0.76555	-0.38542	0.021675
PC O-18:0_22:4	0.84714	-0.23933	0.32044
PC O-20:0_20:4	0.71355	-0.48691	0.01022
PE 40:4	0.20632	-2.277	2.126e-07
PE O-18:0_22:4	0.41508	-1.2685	1.1679e-05
LNAPE 22:4/N-20:0	0.70063	-0.51327	0.017532
PC 18:0_24:4	0.6767	-0.56342	0.078503
PC 22:0_20:4	0.68698	-0.54167	0.019858
PC O-22:0_20:4	0.45252	-1.1439	6.3089e-06
PC 24:0_20:4	0.79302	-0.33456	0.16123
PC O-44:4	0.47918	-1.0614	0.00050532
SE 28:1/20:3	1.1475	0.19856	0.42631
TG 51:4	0.41213	-1.2788	0.0019243
TG 53:4	0.61756	-0.69534	0.050484
TG 54:4	0.52531	-0.92875	0.0021938
Cer 21:0;2O/16:3;(3OH)(FA 18:1)	1.3413	0.42367	0.18472
TG 55:4	1.1364	0.18448	0.45433
TG O-56:4	0.12365	-3.0157	0.00034995
TG 57:4	0.87857	-0.18677	0.66301
TG 58:4	0.86802	-0.2042	0.59285
TG O-22:1_18:1_18:2	0.12699	-2.9773	0.0011838
TG 18:2_18:2_23:0	0.14963	-2.7405	0.001096
TG 60:4	0.18314	-2.449	0.0013562
TG 62:4	0.27853	-1.8441	0.0078543
TG 64:4	0.69285	-0.52938	0.3457
TG 66:4	0.50135	-0.99611	0.093726
TG 67:4	0.30475	-1.7143	0.0538
TG 68:4	0.59248	-0.75515	0.1704
TG 70:4	0.6163	-0.6983	0.098498
CE 20:5	5.72	2.516	2.7835e-06
LPC 22:5	1.0587	0.082309	0.72739
LPE 22:5	1.1273	0.17285	0.61947
CE 24:5	0.14979	-2.739	3.1966e-07
LPC 24:5	0.75343	-0.40845	0.2497
PC 34:5	3.342	1.7407	5.8366e-05
PC O-34:5	0.32896	-1.604	0.00021039
PC O-36:5	0.21377	-2.2259	1.0932e-05
PC O-18:1_20:4	0.70681	-0.50061	0.020418
PE 36:5	1.3795	0.46411	0.02811
PE O-16:1_20:4	0.40769	-1.2945	4.1983e-05
PE O-18:3_18:2	0.19029	-2.3937	2.7835e-06
PC 17:1_20:4	0.74122	-0.43203	0.041718
PC 16:0_22:5	0.68026	-0.55584	0.00023062
PC 38:5	0.95133	-0.071987	0.61222
PC O-16:0_22:5	0.75491	-0.40561	0.029677
PE 16:0_22:5	0.75692	-0.4018	0.034858
PE 18:1_20:4	1.0808	0.1121	0.35844
PE O-18:1_20:4	0.38413	-1.3803	1.0254e-06
PG 18:1_20:4	0.70044	-0.51367	0.12612
PI 18:0_22:5	3.3782	1.7563	8.229e-05
PI 18:1_20:4	0.69946	-0.51569	0.050129
PC 19:1_20:4	0.31251	-1.678	0.00010042
PC 39:5	1.2141	0.27987	0.27373
LNAPE 22:5/N-18:0	0.67756	-0.56158	0.019858
PC 40:5	0.93078	-0.10349	0.55408
PE 40:5	0.86112	-0.21571	0.23911
PE O-18:1_22:4	0.78428	-0.35056	0.066155
PE O-20:1_20:4	0.31738	-1.6557	9.9335e-08
PC 41:5	0.52533	-0.9287	0.0026423
LNAPE 42:5	0.80628	-0.31065	0.10094
PC O-20:0_22:5	0.93983	-0.089535	0.61754
PC O-22:1_20:4	0.97417	-0.037755	0.83817
SM 42:5;2O	0.059123	-4.0801	3.5007e-05
PC 20:4_24:1	1.3229	0.40367	0.028526
PC O-20:4_24:1	1.0011	0.0015176	0.99552
SM 44:5;2O	0.087602	-3.5129	3.1126e-06
TG 46:5	24.905	4.6384	7.6562e-05
TG 47:5	19.862	4.3119	0.0014649
SE 28:1/20:4	0.079046	-3.6612	7.5198e-11
SE 29:1/20:4	0.20254	-2.3037	4.749e-06
TG 50:5	1.0346	0.049025	0.91522
TG 51:5	0.5951	-0.74878	0.12211
TG 52:5	0.46757	-1.0967	0.0040336
TG 17:1_18:2_18:2	0.63784	-0.64872	0.059582
TG 53:5	0.60128	-0.73388	0.035876
TG 54:5	1.0429	0.060562	0.83817
TG 55:5	1.3439	0.42643	0.052273
TG 56:5	1.2468	0.31827	0.086207
TG 58:5	2.0372	1.0266	0.00035729
TG 59:5	1.0935	0.12897	0.76518
TG 60:5	1.3973	0.4826	0.18401
TG 66:5	0.42519	-1.2338	0.088724
TG 68:5	0.23889	-2.0656	0.019907
TG 70:5	0.29837	-1.7448	0.009936
TG 72:5	0.94187	-0.086399	0.83817
FA 22:6	2.5832	1.3692	0.0053771
LPC 22:6	1.9762	0.98273	0.00011373
LPE 22:6	2.5356	1.3423	0.00010202
LPI 22:6	4.7938	2.2612	0.00018219
PC 34:6	18.866	4.2378	6.2907e-07
PC O-36:6	8.1134	3.0203	1.0628e-07
PC 37:6	1.0413	0.058395	0.83564
PC 16:0_22:6	1.02	0.028558	0.85842
PC 18:2_20:4	0.49859	-1.0041	2.6791e-05
PC O-16:0_22:6	1.2316	0.30057	0.18289
PC O-16:1_22:5	0.26135	-1.9359	2.4632e-05
PC O-18:2_20:4	0.11911	-3.0696	3.053e-07
PE 38:6	1.5541	0.63606	0.0035418
PE O-16:1_22:5	0.72718	-0.45962	0.026296
PG 18:2_20:4	0.20326	-2.2986	7.2944e-06
PI 16:0_22:6	1.5534	0.63539	0.0078593
PI 18:0_22:6	4.3991	2.1372	0.00034761
PI 18:2_20:4	0.23773	-2.0726	0.00013523
PS 38:6	19.478	4.2838	2.4206e-06
PC 17:0_22:6	0.7202	-0.47353	0.040181
LNAPE 40:6	0.86862	-0.2032	0.44006
PC 18:0_22:6	1.2803	0.35644	0.062626
PC 18:1_22:5	1.0908	0.12533	0.48351
PC 20:2_20:4	0.36781	-1.443	4.2005e-05
PC O-18:0_22:6	1.1551	0.20799	0.27616
PC O-18:1_22:5	0.69216	-0.53083	0.037523
PC O-20:2_20:4	0.24267	-2.0429	3.5849e-07
PE 40:6	2.4756	1.3078	0.00032869
PE O-18:1_22:5	0.40062	-1.3197	9.2353e-05
PC 41:6	1.7267	0.788	0.0023211
SM 41:6;2O	0.12252	-3.0289	2.6273e-08
LNAPE 42:6	1.0464	0.065475	0.77407
PC 20:0_22:6	1.8681	0.90156	0.0015456
PC 20:1_22:5	1.6818	0.75002	1.5029e-05
PC O-22:2_20:4	0.24584	-2.0242	3.2729e-05
PC O-42:6	1.386	0.47093	0.032013
PC O-44:6	1.4611	0.54709	0.0026423
SM 46:6;2O	0.47314	-1.0797	0.0002816
TG 46:6	92.047	6.5243	1.1271e-06
SE 28:2/20:4	0.10248	-3.2866	1.0253e-06
TG 48:6	83.662	6.3865	2.0498e-06
TG 12:0_16:0_22:6	7.0222	2.8119	0.0011624
TG 12:0_18:2_20:4	0.93829	-0.09189	0.85842
TG 52:6	0.27363	-1.8697	0.00039437
TG 52:6.1	0.1997	-2.3241	4.9532e-05
TG 14:0_16:0_22:6	4.321	2.1114	0.0011944
TG 16:0_18:2_20:4	0.28049	-1.834	4.7265e-05
TG 55:6	0.63734	-0.64988	0.028526
TG 57:6	1.1732	0.23046	0.34124
TG 58:6	0.77956	-0.35928	0.25256
TG 60:6	1.1556	0.20861	0.55408
TG 68:6	0.59782	-0.74222	0.15974
TG 70:6	0.70658	-0.50108	0.32801
PE O-16:1_22:6	0.72101	-0.47191	0.027009
PC 39:7	1.4254	0.51136	0.055978
PC 40:7	1.3055	0.38458	0.047068
PC O-40:7	1.0156	0.022336	0.91933
PE O-18:1_22:6	0.5401	-0.8887	0.0021843
PC 41:7	2.3832	1.2529	0.00012654
PC 20:1_22:6	1.8751	0.907	5.0525e-06
PC 20:2_22:5	0.4701	-1.089	0.00053008
PE O-20:1_22:6	0.50691	-0.98019	4.2363e-05
PC O-46:7	1.1976	0.26013	0.29292
SE 28:1/22:6	0.18756	-2.4146	3.8036e-05
TG 52:7	1.1882	0.24878	0.66624
TG 54:7	0.40048	-1.3202	0.025934
TG 16:0_18:1_22:6	0.79157	-0.33722	0.39193
TG 57:7	0.66583	-0.58677	0.071153
TG 58:7	0.49988	-1.0003	0.00050236
TG 59:7	0.87617	-0.19072	0.46905
TG 60:7	0.43789	-1.1914	0.0031974
PC 40:8	0.64478	-0.63313	0.0072024
PG 20:4_20:4	0.52123	-0.94	0.005686
PC 20:4_22:4	0.52589	-0.92717	0.001054
PC O-42:8	0.19564	-2.3537	1.8061e-05
PC 20:4_24:4	0.1414	-2.8222	3.2281e-05
PC O-44:8	0.19291	-2.374	0.00015947
PE O-22:2_22:6	1.007	0.010058	0.96819
TG 18:2_18:3_18:3	0.088308	-3.5013	0.090303
TG 54:8	0.51144	-0.96737	0.014232
TG 57:8	0.43857	-1.1891	0.002266
TG 58:8	0.36353	-1.4599	0.00015764
TG 60:8	0.32897	-1.604	0.00068961
TG 62:8	0.22933	-2.1245	0.00022555
PC 40:9	1.2272	0.29532	0.39557
PC O-40:9	0.29532	-1.7596	0.00020225
PC 20:4_22:5	1.0005	0.00074366	0.99657
PG 20:4_22:5	0.45686	-1.1302	0.012685
TG 56:9	0.071521	-3.8055	1.8907e-05
TG 57:9	0.42786	-1.2248	0.002266
TG 60:9	0.45916	-1.1229	0.00031277
TG 62:9	0.64539	-0.63176	0.045403
PC 20:4_22:6	1.1211	0.16487	0.45914
TG 56:10	0.31353	-1.6733	0.035876
TG 58:10	0.012007	-6.38	2.5631e-07
TG 60:10	0.12581	-2.9907	1.6928e-06
TG 62:10	0.13137	-2.9283	2.3336e-06
TG 64:10	0.16035	-2.6407	0.00020225
PC 22:5_22:6	3.0837	1.6247	1.2248e-06
TG 62:11	0.084013	-3.5733	4.3657e-05
TG 64:11	0.091829	-3.4449	7.6691e-05
PC 44:12	5.372	2.4255	6.2183e-05
TG 58:12	0.16981	-2.558	7.6562e-05
TG 64:12	0.074268	-3.7511	8.4858e-05
TG 62:13	0.036303	-4.7837	8.0486e-07
TG 64:13	0.022967	-5.4443	9.9296e-06
TG 62:14	0.040299	-4.6331	0.00035729
TG 64:14	0.12808	-2.9649	0.00079692
TG 64:16	6.2372	2.6409	0.0032322
CoQ8	1.5058	0.59051	0.019188
CoQ9	1.2033	0.26695	0.33206
CoQ10	1.2899	0.36726	0.051861
CL 18:2_18:2_18:2_18:2	0.4201	-1.2512	0.076351

## Sheet: Supplementary File 3
	Diet rich in lauric acid			Normal chow diet			High-fiber diet				Quality control
Lipid species	Fold change (FC)	log2(FC)	p-value (raw)	Fold change (FC)	log2(FC)	p-value (raw)	Fold change (FC)	log2(FC)	p-value (raw)		CV%
CAR 12:0	0.93376	-0.098871	0.37038	0.55746	-0.84306	0.11275	0.65976	-0.59998	0.01469		0.0438999		Abbreviation	Lipid class
CAR 14:0	1.0149	0.021341	1	0.56337	-0.82784	0.034987	0.89761	-0.15584	0.43587		0.0489136		CAR	Acylcarnitines
CAR 14:1	0.98163	-0.026741	0.74299	0.51546	-0.95606	0.013272	0.86554	-0.20833	0.35268		0.0636072		CE	Cholesterylester
CAR 14:2	1.3032	0.38201	0.11394	0.517	-0.95176	0.022018	1.0462	0.0652	0.57874		0.0648062		Cer	Ceramides
CAR 16:0	1.1725	0.22965	0.19959	0.61485	-0.70168	0.0029877	1.0409	0.057895	0.79594		0.0397944		CL	Cardiolipin
CAR 16:1	1.2303	0.29898	0.37038	0.40352	-1.3093	0.0041352	1.032	0.045402	0.63053		0.0646002		CoQ	Coenzym Q
CAR 16:2	1.4011	0.48661	0.13879	0.44957	-1.1534	0.0076209	1.0826	0.11454	0.68421		0.0776205		DLCL	Dilysocardiolipin
CAR 18:0	1.0242	0.034435	0.74299	0.8156	-0.29406	0.35623	0.93985	-0.089497	0.68421		0.0591429		FA	(Free) Fatty acid
CAR 18:1	1.2919	0.36949	0.74299	0.4869	-1.0383	0.0041352	1.0546	0.076737	0.63053		0.0687143		HexCer	Hexosylceramide/Cerebroside
CAR 20:0	1.0391	0.055358	0.81481	0.98151	-0.026918	0.60378	1.0183	0.026105	0.97051		0.0474258		LNAPE	N-acyl lysophosphatidylethanolamine
CAR 22:0	0.95738	-0.062831	0.81481	0.8265	-0.27491	0.1333	0.93912	-0.09062	0.63053		0.0631715		LPC	Lysophosphatidylcholine
CAR 24:0	0.92983	-0.10496	0.37038	1.0214	0.030552	0.78019	0.94766	-0.077553	0.52885		0.195132		LPC O	Ether-linked lysophosphatidylcholine/plasmalogen LPC
CAR 24:1	1.0482	0.067917	0.60584	0.94712	-0.078381	0.7197	1.1765	0.23445	0.043257		0.0506499		LPE	Lysophosphatidylethanolamine
CE 14:0	0.91641	-0.12593	0.60584	0.94875	-0.075897	0.90483	1.0379	0.053634	0.73936		0.026516		LPE O	Ether-linked lysophosphatidylethanolamine/plasmalogen LPE
CE 17:0	1.3394	0.42155	0.007898	0.93731	-0.093405	0.44697	1.0192	0.027401	0.79594		0.140944		LPI	Lysophosphatidylinositol
CE 18:3	1.3856	0.47049	0.02065	0.78049	-0.35755	0.40018	1.263	0.33688	0.075256		0.0227189		LPS	Lysophosphatidylserine
CE 20:1	1.2687	0.34337	0.092719	0.9186	-0.12249	0.4967	0.88914	-0.16952	0.52885		0.0852327		PA	Phosphatidic acid
CE 20:5	1.7307	0.79137	8.2271e-05	0.85134	-0.2322	0.40018	1.0588	0.082443	0.35268		0.0302362		PC	Phosphatidylcholine
CE 24:3	1.1152	0.15732	0.48071	1.0027	0.0038287	0.96824	0.85312	-0.22917	0.052426		0.048717		PC O	Ether-linked phosphatidylcholine/Plasmalogen PC
CE 24:4	1.6079	0.6852	0.046401	0.73545	-0.4433	0.60378	0.92914	-0.10603	0.27986		0.0582348		PE	Phosphatidylethanolamine
CE 24:5	1.5697	0.65046	0.011107	0.76357	-0.38917	0.1333	0.87035	-0.20033	0.27986		0.032721		PE O	Ether-linked phosphatidylethanolamine/Plasmalogen PE
Cer 18:0;2O/16:0	0.56007	-0.83631	0.027396	1.3649	0.44882	0.11275	0.71308	-0.48787	0.08921		0.0987546		PG	Phosphatidylglycerol
Cer 18:0;2O/22:0	0.52588	-0.9272	0.092719	1.1111	0.15198	0.7197	0.69591	-0.52303	0.12301		0.0317988		PI	Phosphatidylinositol
Cer 18:0;2O/23:0	0.46606	-1.1014	0.02065	1.1748	0.23242	0.078893	0.84519	-0.24265	0.63053		0.0229002		PS	Phosphatidylserine
Cer 18:0;2O/24:0	0.44043	-1.183	0.074455	1.3744	0.45875	0.35623	0.7845	-0.35016	0.14314		0.0510679		SE	Steryl ester
Cer 18:0;2O/24:1	0.57098	-0.8085	0.27659	1.3244	0.40538	0.27751	1.2261	0.29403	0.36417		0.103558		SL	Sulfonolipid
Cer 18:0;2O/25:0	0.47161	-1.0843	0.092719	1.3652	0.44916	0.27751	0.91153	-0.13363	0.79594		0.067724		SM	Sphingomyelin
Cer 18:0;3O/14:0;(2OH)	0.93158	-0.10225	0.88836	1.0189	0.027045	0.84211	0.86543	-0.20851	0.38432		0.0252377		ST	Cholesterol sulfate
Cer 18:0;3O/16:0	0.72516	-0.46364	0.42345	1.0969	0.13341	0.18232	0.81888	-0.28828	0.43587		0.0317561		TG	Triacylglyceride
Cer 18:0;3O/16:0;(2OH)	0.98432	-0.022801	0.74299	0.81594	-0.29346	0.053476	0.8228	-0.28139	0.19032		0.0469008		TG O	Ether-linked triacylglyceride
Cer 18:0;3O/20:0	0.80199	-0.31834	0.32127	1.1186	0.1617	0.96824	0.9765	-0.034313	0.9118		0.0409479
Cer 18:0;3O/21:0	0.67878	-0.55899	0.035952	1.0134	0.019156	0.78019	1.1598	0.21393	0.79594		0.054557		Lipid species are represented either as sum composition (carbons and double bonds), or if possible/unambiguous with the composition of acyl chains.
Cer 18:0;3O/22:0	0.92807	-0.1077	0.74299	1.0939	0.12953	0.66072	0.9451	-0.08146	0.73936		0.0350938
Cer 18:0;3O/22:0;(2OH)	0.95778	-0.062232	0.60584	0.82169	-0.28333	0.022018	0.80777	-0.30798	0.12301		0.0495839
Cer 18:0;3O/22:1	1.0088	0.012653	1	1.0674	0.094098	0.90483	0.942	-0.086204	0.73936		0.0420019
Cer 18:0;3O/23:0;(2OH)	1.0352	0.0499	0.88836	0.83096	-0.26715	0.11275	0.91484	-0.1284	0.43587		0.0412419
Cer 18:0;3O/24:0	0.64234	-0.6386	0.19959	0.99562	-0.0063263	0.54896	0.83329	-0.26311	0.315		0.0353847
Cer 18:0;3O/24:0;(2OH)	1.036	0.051069	0.74299	0.73978	-0.43484	0.022018	0.80703	-0.3093	0.12301		0.0462097
Cer 18:0;3O/24:1;(2OH)	0.87529	-0.19217	0.42345	0.75868	-0.39843	0.11119	0.84805	-0.23777	0.27986		0.0399239
Cer 18:0;3O/25:0	0.72063	-0.47267	0.60584	0.98727	-0.018489	0.78019	0.91627	-0.12616	0.48125		0.0525267
Cer 18:1;2O/14:0	0.91826	-0.12302	0.81481	0.9794	-0.030023	0.43774	0.9444	-0.082532	0.47218		0.0477891
Cer 18:1;2O/16:0	0.78561	-0.34812	0.32127	1.0586	0.082132	0.90483	0.86154	-0.21501	0.315		0.0353802
Cer 18:1;2O/20:0	0.92515	-0.11224	0.81481	0.80579	-0.31152	0.1333	1.0194	0.027711	0.52885		0.0370956
Cer 18:1;2O/22:0	0.72812	-0.45775	0.23587	0.88207	-0.18104	0.11275	0.97343	-0.038846	0.79594		0.0596801
Cer 18:1;2O/24:0	0.7843	-0.35053	0.23587	1.0415	0.058723	0.60378	0.99578	-0.0060952	0.9118		0.0765462
Cer 18:1;2O/24:1	0.69343	-0.52817	0.37038	1.0338	0.047914	0.78019	0.97141	-0.04185	0.97051		0.065326
Cer 18:2;2O/22:0	0.99093	-0.013149	0.96257	0.93712	-0.093687	0.4967	0.82372	-0.27977	0.19032		0.0332986
Cer 18:2;2O/24:1	0.8365	-0.25757	0.16717	0.8695	-0.20173	0.21102	0.87461	-0.19329	0.52885		0.0319854
Cer 20:0;3O/24:0	0.71564	-0.48269	0.16717	1.0641	0.089661	1	0.7451	-0.4245	0.19032		0.0559302
Cer 21:0;2O/16:3;(3OH)(FA 18:1)	0.86998	-0.20095	0.88836	1.0399	0.056405	0.96824	1.0586	0.082109	0.63053		0.0773717
CL 18:2_18:2_18:2_18:2	1.5556	0.63748	0.81481	1.766	0.82045	0.60378	0.95518	-0.066156	0.73936		0.0188566
CoQ10	1.1033	0.14186	0.11394	0.69349	-0.52805	0.09472	0.92683	-0.10962	0.63053		0.0438429
CoQ8	0.76835	-0.38017	0.035952	0.65499	-0.61047	0.1333	1.0868	0.12006	0.73936		0.0393195
CoQ9	0.90765	-0.13979	0.27659	0.67846	-0.55966	0.24281	0.95203	-0.070918	0.85343		0.0401464
DLCL 18:1_18:2	1.1488	0.20015	0.23587	0.90504	-0.14394	0.44697	0.97905	-0.030542	0.68421		0.0405577
DLCL 18:2_18:2	0.98272	-0.025143	0.96257	0.85533	-0.22544	0.40018	0.932	-0.10159	0.68421		0.0536779
FA 18:1	0.80946	-0.30497	0.27659	0.54189	-0.88393	0.0041352	0.92397	-0.11409	0.63053		0.0227524
FA 18:2	0.8993	-0.15313	0.96257	0.52953	-0.91722	0.0076209	0.85954	-0.21836	0.68421		0.0530807
FA 20:0	0.98606	-0.02025	0.96257	1.0013	0.0018979	0.78019	1.2006	0.2637	0.16549		0.0524503
FA 20:4	0.97039	-0.043359	0.60584	0.72784	-0.45831	0.23624	1.0844	0.11694	0.315		0.0778584
FA 22:6	0.85144	-0.23202	0.13879	0.50077	-0.99779	0.017212	1.0913	0.12605	0.24745		0.0708725
HexCer 18:0;3O/12:0;(2OH)	0.77091	-0.37537	0.11394	1.0988	0.13587	0.80633	0.99433	-0.0082079	0.97051		0.0341872
HexCer 18:0;3O/14:0;(2OH)	0.98188	-0.026378	0.67297	0.95067	-0.072979	0.60378	0.89993	-0.15212	0.21756		0.0282182
HexCer 18:0;3O/16:0;(2OH)	1.0411	0.058099	0.67297	0.78759	-0.34448	0.022018	0.84875	-0.2366	0.21756		0.0458594
HexCer 18:0;3O/22:0;(2OH)	0.95636	-0.064368	0.81481	0.81609	-0.29321	0.053476	0.79847	-0.32469	0.315		0.0621927
HexCer 18:0;3O/23:0;(2OH)	0.99585	-0.0060058	0.81481	0.83809	-0.25482	0.078893	0.88123	-0.18241	0.43587		0.029507
HexCer 18:0;3O/24:0;(2OH)	1.1348	0.18245	0.96257	0.65642	-0.60732	0.022018	0.73592	-0.44238	0.043257		0.045638
HexCer 18:1;2O/14:0	0.85925	-0.21885	0.23587	1.0027	0.0038897	0.90483	1.0526	0.073977	0.48125		0.0460688
HexCer 18:1;2O/16:0	0.77413	-0.36935	0.074455	1.0126	0.01803	0.60378	0.94508	-0.081495	0.52885		0.0417477
HexCer 18:1;2O/20:0	1.0828	0.11481	0.54142	0.84855	-0.23693	0.078893	1.0013	0.0018122	0.73936		0.0391964
HexCer 18:1;2O/22:0	0.83278	-0.26399	0.67297	0.93173	-0.10202	0.96824	1.0141	0.020254	0.43587		0.0421524
HexCer 18:1;2O/22:1	0.97457	-0.037158	0.60584	0.98593	-0.020437	1	1.0703	0.097964	0.52885		0.042607
HexCer 18:1;2O/23:0	1.0432	0.061047	0.54142	0.97547	-0.035837	0.66072	1.0277	0.039426	0.85343		0.050208
HexCer 18:1;2O/24:0	1.0005	0.00071307	0.96257	0.9399	-0.089421	0.27751	0.95125	-0.072103	0.315		0.0356783
HexCer 18:1;2O/24:1	0.78937	-0.34122	0.092719	0.9704	-0.043356	0.96824	0.97235	-0.04045	0.79594		0.0550471
HexCer 18:1;2O/24:2	1.0121	0.017387	0.96257	0.8966	-0.15746	0.24281	1.0797	0.11061	0.43587		0.0393122
LNAPE 16:0/N-18:0	1.179	0.23754	0.23587	1.0002	0.00033838	0.48748	1.1203	0.16388	0.27986		0.0572375
LNAPE 16:1/N-18:0	0.92729	-0.1089	0.54142	1.1582	0.21193	0.7197	1.1272	0.17279	0.27986		0.0651746
LNAPE 18:0/N-20:0	1.1153	0.15744	0.81481	0.86325	-0.21215	0.21102	1.1222	0.16635	0.48125		0.0404949
LNAPE 18:1/N-18:0	1.0956	0.13171	0.96257	0.91641	-0.12593	0.60378	1.1457	0.19619	0.052426		0.02867
LNAPE 18:1/N-20:0	0.98596	-0.0204	0.54142	0.92846	-0.10709	0.78019	1.0298	0.042382	0.57874		0.0449975
LNAPE 18:1/N-20:1	1.0664	0.092814	0.74299	0.98342	-0.024127	0.7197	1.085	0.11764	0.43587		0.0148123
LNAPE 18:1/N-21:0	0.89992	-0.15213	0.32127	0.98573	-0.020731	0.7197	1.0553	0.077644	0.79594		0.0379707
LNAPE 18:2/N-20:0	1.0715	0.099615	0.67297	0.90943	-0.13696	0.40018	0.97142	-0.041826	0.79594		0.0534106
LNAPE 18:2/N-21:0	0.92775	-0.1082	0.81481	1.0082	0.011721	0.44697	1.0724	0.10089	0.85343		0.0398669
LNAPE 20:1/N-20:0	0.78227	-0.35426	0.092719	0.83577	-0.25881	0.12066	1.0899	0.12423	0.57874		0.0487732
LNAPE 20:2/N-20:0	0.87514	-0.19241	0.23587	0.8622	-0.21391	0.043474	1.0383	0.054254	0.315		0.0505096
LNAPE 22:2	0.68076	-0.55478	0.035952	0.99785	-0.0031032	0.40018	0.60498	-0.72504	0.315		0.0497851
LNAPE 22:4/N-20:0	1.0375	0.053175	0.96257	0.75544	-0.40462	0.09472	1.1031	0.14155	0.12301		0.0573368
LNAPE 22:5/N-18:0	1.2931	0.37085	0.13879	0.69432	-0.52633	0.44697	1.1797	0.23837	0.19032		0.0571362
LNAPE 28:0	0.70768	-0.49883	0.092719	0.95628	-0.064495	0.96742	0.94251	-0.08542	0.9118		0.0452235
LNAPE 32:0	0.84242	-0.24738	0.092719	0.88276	-0.17991	0.4967	1.0153	0.021894	0.79594		0.0464085
LNAPE 34:2	0.77308	-0.37131	0.074455	0.92961	-0.1053	0.78019	1.0057	0.0081427	1		0.0422721
LNAPE 36:0	1.1936	0.25526	0.27659	0.96569	-0.050364	0.4967	1.2076	0.27219	0.063013		0.0392135
LNAPE 40:6	1.4875	0.57288	0.13879	0.92475	-0.11287	0.78019	1.194	0.25578	0.052426		0.0363845
LNAPE 42:5	1.1726	0.22975	0.67297	0.52659	-0.92525	0.66072	1.1312	0.17786	0.12301		0.040991
LNAPE 42:6	1.3414	0.42377	0.02065	0.85831	-0.22043	0.21102	1.1835	0.24309	0.24745		0.0551192
LPC 10:0	0.67592	-0.56508	0.19959	0.89761	-0.15584	0.31538	1.1655	0.22096	0.9118		0.0709882
LPC 12:0	0.72709	-0.45979	0.27659	0.79608	-0.32902	0.44697	0.60542	-0.724	0.48125		0.229405
LPC 14:0	0.94888	-0.075707	1	1.1894	0.25028	0.60378	0.97346	-0.038807	1		0.0487605
LPC 14:1	0.81056	-0.30301	0.54142	1.4998	0.58474	0.78019	0.90284	-0.14746	0.63053		0.0740901
LPC 16:1	0.95009	-0.073858	0.48071	1.3056	0.38469	0.40018	1.0152	0.021754	0.97051		0.0320126
LPC 17:0	1.2433	0.31418	0.32127	1.1377	0.1861	0.60378	1.1786	0.23713	0.043257		0.0532447
LPC 17:1	1.1599	0.21394	0.48071	1.1062	0.14557	0.96824	1.2195	0.28628	0.27986		0.0450552
LPC 17:2	1.1096	0.15002	0.54142	1.0587	0.082357	0.96824	0.91447	-0.12899	0.57874		0.0466435
LPC 18:0	1.0492	0.069349	0.88836	1.0826	0.11446	0.31538	1.0916	0.1265	0.27986		0.0642433
LPC 18:1	1.1227	0.16694	0.60584	1.0244	0.034758	0.66072	0.99519	-0.0069518	0.48125		0.0761646
LPC 18:2	0.92859	-0.10689	0.67297	1.1001	0.13762	0.44697	1.0299	0.042448	0.97051		0.0476767
LPC 18:3	0.9837	-0.023705	0.96257	1.2213	0.28842	0.4967	1.2249	0.29262	0.10512		0.0489213
LPC 19:1	1.0456	0.064336	0.60584	1.3076	0.38692	0.31538	1.1731	0.23036	0.35268		0.0486431
LPC 20:0	1.0166	0.023723	0.81481	1.1108	0.15162	0.31538	1.0976	0.13434	0.27986		0.0563015
LPC 20:2	1.1169	0.15946	0.48071	1.2505	0.32255	0.18232	1.178	0.23637	0.21756		0.050918
LPC 20:3	1.0099	0.014281	0.88836	1.1564	0.20965	0.54896	1.1414	0.19081	0.9118		0.0458611
LPC 21:0	0.89432	-0.16113	0.37038	1.1265	0.17182	0.40018	1.0845	0.11704	0.48125		0.0737543
LPC 21:1	1.1677	0.22371	0.54142	0.99541	-0.0066397	0.96824	2.1146	1.0804	0.028806		0.0740183
LPC 22:0	1.1082	0.14816	0.42345	1.1436	0.19358	0.24281	0.94196	-0.086258	0.52885		0.0568389
LPC 22:1	0.97869	-0.031077	1	1.0873	0.1207	0.31538	1.0363	0.051492	0.68421		0.0480961
LPC 22:2	0.89472	-0.16049	0.96257	1.0669	0.093485	0.4967	1.2404	0.31078	0.52885		0.0614539
LPC 22:3	0.8816	-0.1818	0.54142	1.2439	0.31492	0.44697	1.1756	0.23342	0.39305		0.0658202
LPC 22:4	1.1371	0.18531	0.54142	1.0207	0.029502	0.35623	1.143	0.19288	0.10512		0.0309486
LPC 22:5	1.1197	0.16312	0.48071	1.1478	0.19888	0.60378	1.1151	0.15718	0.68421		0.0414799
LPC 22:6	1.1581	0.21176	0.48071	1.1034	0.14201	0.27751	1.1691	0.22542	0.19032		0.0317199
LPC 24:0	1.0961	0.13243	0.42345	1.2561	0.32896	0.053476	1.0995	0.13678	0.52885		0.0802636
LPC 24:1	1.0224	0.03192	0.74299	1.1908	0.2519	0.09472	1.0068	0.009708	0.85343		0.0707828
LPC 24:3	0.9254	-0.11185	0.88836	1.1328	0.17994	0.44697	1.2634	0.3373	0.73936		0.0558644
LPC 24:4	0.96988	-0.044121	1	1.2387	0.3088	0.1564	1.0765	0.10628	0.79594		0.063693
LPC 24:5	0.75391	-0.40753	0.16717	0.90983	-0.13633	0.96824	1.1299	0.17621	0.48125		0.0854246
LPC 26:1	1.0355	0.050287	0.67297	1.1331	0.18021	0.11275	1.1194	0.16266	0.27986		0.078851
LPC 26:2	0.97508	-0.036408	1	1.0822	0.11403	0.35623	1.0633	0.088547	0.48125		0.0579561
LPC O-16:0	1.3032	0.38206	0.19959	1.1558	0.20895	0.35623	1.0712	0.099241	0.43587		0.0603247
LPC O-16:1	1.2911	0.36859	0.23587	1.1757	0.23353	0.21102	1.1143	0.15618	0.27986		0.0499241
LPC O-18:0	1.0152	0.021786	1	1.0562	0.078909	0.78019	1.1207	0.16434	0.35268		0.0589795
LPC O-18:1	1.1385	0.18715	0.42345	1.3845	0.46942	0.21102	0.98385	-0.023492	0.73936		0.0512826
LPC O-19:0	0.95056	-0.073143	0.74299	1.0614	0.085909	0.66072	1.2854	0.36225	0.08921		0.0931948
LPC O-20:0	1.005	0.0071486	0.96257	1.0405	0.057343	0.54896	1.1207	0.1644	0.10512		0.0497908
LPC O-22:0	0.99471	-0.007646	0.96257	1.0637	0.089096	0.7197	1.1505	0.20231	0.14314		0.0717041
LPC O-22:1	1.1798	0.2385	0.67297	1.0044	0.0063572	0.90483	1.0893	0.12342	0.315		0.0517131
LPC O-24:1	1.0249	0.035553	0.96257	1.0545	0.076598	1	1.0447	0.063047	0.35268		0.0915717
LPC O-24:2	1.0581	0.081423	0.88836	1.0078	0.011227	0.54896	0.90363	-0.1462	0.21756		0.0590545
LPE 16:0	1.0248	0.035397	0.81481	1.0201	0.028682	0.90483	1.0835	0.11568	0.39305		0.037309
LPE 17:0	1.1122	0.15347	0.42345	1.1107	0.15147	0.54896	0.95152	-0.071687	0.9118		0.0631437
LPE 18:0	1.0818	0.11339	0.81481	0.94953	-0.074721	0.4967	1.0016	0.0023208	0.9118		0.0503856
LPE 18:1	0.96231	-0.055423	0.96257	1.136	0.18394	0.1564	1.0527	0.07409	0.79594		0.0231626
LPE 18:2	0.97349	-0.038764	0.96257	1.1762	0.23411	0.11275	0.92766	-0.10834	0.57874		0.0347761
LPE 20:4	1.0518	0.072872	0.32127	1.0317	0.045026	0.78019	1.2412	0.31178	0.043257		0.0393295
LPE 22:5	0.96186	-0.0561	0.60584	1.1082	0.14821	0.96824	1.4669	0.55276	0.018543		0.027442
LPE 22:6	0.94757	-0.077689	0.60584	0.98947	-0.015269	0.96824	1.574	0.6544	0.005196		0.0313829
LPE O-16:1	1.2153	0.28134	0.23587	1.2772	0.35297	0.1564	0.97884	-0.03085	0.79594		0.0427183
LPE O-18:1	1.0546	0.076692	0.81481	1.154	0.2067	0.7197	0.92953	-0.10542	0.48125		0.0491394
LPI 18:0	1.3235	0.40439	0.16717	1.0984	0.13543	0.90483	1.3135	0.39347	0.063013		0.129457
LPI 18:1	0.99538	-0.0066819	0.74299	1.2862	0.36312	0.4967	1.4433	0.52937	0.52885		0.10066
LPI 18:2	1.0146	0.020866	0.96257	1.0301	0.042743	0.96824	1.0426	0.060191	0.68421		0.0906322
LPI 20:3	1.3108	0.3905	0.27659	1.047	0.066262	0.71318	0.96799	-0.04694	0.87978		0.0852907
LPI 22:6	1.3926	0.47779	0.23587	1.0664	0.09273	0.7197	1.4515	0.53753	0.10512		0.097504
PC 12:0_12:0	0.77073	-0.37571	0.32127	0.95513	-0.066231	0.78019	0.30299	-1.7226	1		0.0465866
PC 16:0_18:3	0.93345	-0.099348	0.74299	1.1473	0.19819	0.35623	1.2784	0.35437	0.16181		0.0169993
PC 16:0_20:3	0.76584	-0.38489	0.37038	1.306	0.38516	0.21102	1.0689	0.096128	0.79126		0.0240523
PC 16:0_20:4	1.1735	0.23077	0.23587	1.0915	0.12629	0.1333	1.0129	0.018421	0.27986		0.0691157
PC 16:0_22:4	0.97499	-0.036547	0.74299	1.2223	0.28957	0.21102	1.2099	0.27487	0.27986		0.028475
PC 16:0_22:5	1.2116	0.27688	0.027396	1.0714	0.099535	0.4967	1.1478	0.19885	0.08921		0.0831281
PC 16:0_22:6	1.2338	0.30316	0.027396	1.0837	0.11601	0.1333	1.2774	0.35325	0.25666		0.0172411
PC 17:0_18:2	1.0547	0.076779	0.67297	1.001	0.0014161	1	0.98036	-0.028614	0.97051		0.187763
PC 17:0_20:4	1.3173	0.39755	0.059235	0.93831	-0.091867	0.60378	1.2111	0.27632	0.0089307		0.0200874
PC 17:0_22:6	1.4261	0.51206	0.0037022	0.87008	-0.20079	0.4967	1.2272	0.29536	0.12108		0.0209796
PC 17:1_18:2	0.93345	-0.099349	0.48071	1.1484	0.19965	0.66072	0.91752	-0.1242	0.315		0.0315612
PC 17:1_20:4	1.3878	0.47283	0.074455	0.91399	-0.12976	0.54896	1.1058	0.1451	0.39305		0.0400047
PC 18:0_18:1	0.86536	-0.20863	0.13879	1.1551	0.20798	0.40018	0.95589	-0.065086	0.57874		0.0501624
PC 18:0_18:2	0.96046	-0.058207	0.67297	0.99658	-0.0049464	0.60378	0.97087	-0.042646	0.96984		0.0641744
PC 18:0_20:4	1.1103	0.15093	0.42345	1.0184	0.026306	0.78019	0.98476	-0.022157	0.79594		0.027791
PC 18:0_22:3	0.87391	-0.19445	0.37038	1.1057	0.14491	0.27751	1.1884	0.24897	0.18571		0.031644
PC 18:0_22:4	0.8389	-0.25343	0.48071	0.96683	-0.048664	0.54896	1.1511	0.20307	0.85343		0.0309667
PC 18:0_22:6	1.0245	0.034874	0.60584	0.90839	-0.13862	0.96824	1.0547	0.076889	0.5452		0.0237569
PC 18:0_24:4	1.0061	0.0087058	0.88836	0.98224	-0.025854	0.84211	1.3086	0.38807	0.14314		0.0304301
PC 18:1_18:1	0.93086	-0.10336	0.74299	1.2469	0.31835	0.27751	1.0524	0.073749	0.79126		0.075603
PC 18:1_18:2	0.97419	-0.037723	0.81481	1.12	0.16346	0.54896	0.98418	-0.023006	1		0.0910784
PC 18:1_20:3	1.0428	0.060443	0.74299	1.1353	0.18303	0.54896	0.74498	-0.42473	0.315		0.116766
PC 18:1_22:0	0.81879	-0.28844	0.11394	1.297	0.37513	0.053476	1.0518	0.072918	0.79594		0.0307654
PC 18:1_22:5	1.0945	0.1303	0.54142	1.3243	0.4052	0.31538	1.2136	0.27924	0.34452		0.0224623
PC 18:2_18:2	0.85488	-0.22621	0.42345	1.1434	0.19329	0.24281	0.9655	-0.050653	1		0.0313155
PC 18:2_20:4	1.2556	0.32838	0.16717	1.1039	0.14264	0.40018	1.1137	0.1554	0.57874		0.0363216
PC 18:2_22:0	0.75852	-0.39874	0.035952	1.0373	0.052856	0.44697	0.90236	-0.14822	0.43587		0.0281811
PC 18:2_22:1	0.82705	-0.27395	0.11394	0.98384	-0.023508	0.96824	1.0856	0.1185	1		0.0521817
PC 18:2_24:0	0.73157	-0.45092	0.059235	0.99073	-0.013434	0.7197	0.91393	-0.12984	0.52037		0.0466984
PC 19:0_20:4	1.0186	0.026545	0.60584	1.0123	0.017597	0.96824	1.2633	0.33721	0.08921		0.0337008
PC 19:1_20:4	1.1197	0.16306	0.60584	1.0499	0.07023	0.44697	1.2431	0.31397	0.12301		0.0241793
PC 20:0_20:3	0.81046	-0.30319	0.16717	1.0404	0.057145	0.90483	0.90151	-0.14958	0.44952		0.0522976
PC 20:0_20:4	0.97966	-0.029646	0.67297	1.0155	0.022206	0.54896	1.0521	0.073249	0.76228		0.04362
PC 20:0_22:6	1.0805	0.11172	0.67297	0.94785	-0.077273	1	1.1484	0.19962	0.68421		0.0529031
PC 20:1_22:5	0.92819	-0.10752	0.42345	1.028	0.039847	0.7197	1.1738	0.23124	0.096179		0.0189312
PC 20:1_22:6	1.1065	0.14597	0.32127	1.1113	0.15225	0.27751	1.1559	0.20899	0.43587		0.0459183
PC 20:2_20:4	1.1663	0.22196	0.16717	0.80514	-0.31269	0.35623	1.2483	0.31996	0.08921		0.0173579
PC 20:2_22:5	0.98187	-0.026393	0.96257	0.97669	-0.034027	1	1.3167	0.39691	0.08921		0.0250258
PC 20:4_22:4	1.2957	0.37376	0.01522	1.0306	0.043545	0.84211	1.2756	0.35113	0.10512		0.0280064
PC 20:4_22:5	1.3124	0.3922	0.11394	0.97877	-0.03096	0.84211	1.1774	0.23563	0.21212		0.0219866
PC 20:4_22:6	1.6042	0.68184	0.007898	1.1746	0.23222	0.24281	1.0975	0.13427	0.48125		0.0239135
PC 20:4_24:1	0.93986	-0.089483	0.67297	1.1921	0.25345	0.56746	1.0805	0.11176	0.79594		0.0427024
PC 20:4_24:4	1.9319	0.95003	0.0037022	1.111	0.15182	0.54896	1.1192	0.16249	0.63053		0.0146573
PC 22:0	0.82177	-0.28319	0.48071	0.8588	-0.21961	0.84211	1.575	0.65532	0.39305		0.0300389
PC 22:0_20:4	1.048	0.067629	0.88836	1.1381	0.18669	0.31538	1.0531	0.074662	0.63053		0.0320572
PC 22:5_22:6	1.5712	0.65186	0.02065	1.0912	0.12596	0.4967	1.4769	0.5626	0.075552		0.0292302
PC 24:0_18:1	0.87611	-0.19082	0.37038	1.2294	0.29792	0.18232	1.0889	0.12284	1		0.028955
PC 24:0_20:4	1.1472	0.19809	0.19959	1.1372	0.18553	0.66072	1.0441	0.062259	0.79594		0.0290396
PC 26:0	0.71736	-0.47922	0.16717	1.0556	0.07804	0.32697	0.54733	-0.86951	0.30713		0.0425197
PC 26:1	0.78443	-0.35028	0.32127	1.0453	0.063882	0.34753	1.1228	0.16705	0.48125		0.041798
PC 27:0	0.72259	-0.46875	0.19959	1.1462	0.19692	0.31538	0.78437	-0.3504	0.4055		0.0645448
PC 28:0	0.77886	-0.36056	0.19959	1.1159	0.15823	0.54896	0.74346	-0.42767	0.54505		0.0320107
PC 28:1	0.69842	-0.51783	0.23587	1.4506	0.53668	0.015965	0.6909	-0.53344	0.24114		0.0336066
PC 28:2	0.72286	-0.4682	0.27659	1.1547	0.20757	0.13057	0.45594	-1.1331	0.59656		0.0433738
PC 29:0	0.78017	-0.35815	0.16717	0.93654	-0.094586	0.60378	1.026	0.036983	1		0.0215073
PC 29:1	0.61731	-0.69593	0.059235	1.0141	0.020196	0.7197	0.92237	-0.11658	0.52885		0.0301099
PC 30:0	0.7903	-0.33952	0.11394	1.1145	0.15636	0.66072	0.91715	-0.12476	0.85005		0.0260082
PC 30:1	0.80084	-0.32041	0.37038	1.4904	0.57568	0.35623	0.85132	-0.23222	0.85005		0.0356993
PC 30:2	0.67802	-0.56061	0.059235	1.1279	0.17369	0.60378	0.62516	-0.67771	0.57061		0.0333358
PC 31:0	1.031	0.044062	0.96257	0.96964	-0.044484	0.66072	1.0902	0.12465	0.39305		0.0274481
PC 31:1	0.89333	-0.16273	0.37038	1.3796	0.46421	0.40018	1.0391	0.055289	0.93972		0.0369949
PC 32:0	1.0307	0.043636	0.96257	1.1519	0.20401	0.09472	1.0928	0.12802	0.4055		0.0189806
PC 32:1	0.83031	-0.26828	0.11394	1.325	0.406	0.40018	1.0647	0.090498	0.70535		0.0411367
PC 32:2	0.75901	-0.39781	0.11394	1.2456	0.31683	0.54896	0.99134	-0.012545	0.93972		0.0260352
PC 32:3	0.55394	-0.8522	0.035952	1.2655	0.33967	0.90483	1.0205	0.029277	1		0.0730199
PC 32:4	0.73401	-0.44613	0.13879	1.1759	0.23372	0.80633	0.80452	-0.31381	0.49613		0.0280669
PC 33:0	0.9925	-0.010868	0.60584	1.1049	0.14392	0.44697	1.1631	0.218	0.27986		0.0207775
PC 33:1	0.99771	-0.0033071	0.88836	1.1912	0.25238	0.44697	1.1263	0.17157	0.08921		0.0174604
PC 33:2	0.95091	-0.072621	0.81481	1.0785	0.10905	0.96824	0.9714	-0.041864	0.79594		0.0180708
PC 33:3	0.96366	-0.053402	0.96257	1.0706	0.098388	0.90483	1.122	0.16604	0.57874		0.0727402
PC 34:0	1.2489	0.3206	0.13879	1.1065	0.14599	0.18232	1.1186	0.16173	0.4055		0.0508787
PC 34:1	0.94672	-0.078997	0.54142	1.0983	0.13529	0.35623	1.1016	0.13957	0.4055		0.0161058
PC 34:2	1.0563	0.078986	0.48071	1.1327	0.17981	0.027929	1.0511	0.071901	1		0.017727
PC 34:3	0.96211	-0.055727	0.88836	1.0071	0.010184	0.84211	1.0761	0.10579	0.63053		0.0280719
PC 34:4	0.98918	-0.015699	1	1.2321	0.30108	0.40018	1.08	0.11103	0.65002		0.0457377
PC 34:5	0.88238	-0.18053	0.37038	1.3283	0.40953	0.66072	1.044	0.062095	0.73363		0.0399394
PC 34:6	0.90161	-0.14943	0.74299	1.1211	0.16488	0.3689	0.75949	-0.3969	0.40533		0.0929866
PC 35:1	1.0205	0.029212	0.96257	1.1669	0.22262	0.96824	1.1382	0.1868	0.12301		0.025566
PC 35:4	1.427	0.51301	0.092719	1.11	0.15056	0.7197	1.1367	0.18486	0.35268		0.026282
PC 36:0	1.0665	0.092873	0.60584	1.0248	0.035285	0.60378	1.1257	0.17077	0.49613		0.0373309
PC 37:1	0.86205	-0.21416	0.42345	1.1481	0.19929	0.54896	1.0758	0.10543	0.73363		0.0674917
PC 37:2	0.95947	-0.059688	0.48071	1.0636	0.08895	0.66072	1.009	0.012986	0.79126		0.029091
PC 37:4	1.315	0.39511	0.13879	1.06	0.084057	0.84211	1.1899	0.25081	0.11228		0.0218263
PC 37:6	1.3787	0.46332	0.046401	1.0495	0.069647	0.78019	1.2812	0.3575	0.14032		0.0270743
PC 38:1	0.75662	-0.40237	0.046401	1.1122	0.15345	0.40018	1.1809	0.23994	0.28974		0.0474551
PC 38:2	0.77326	-0.37098	0.16717	1.0206	0.02937	0.78019	1.1104	0.15111	0.57874		0.0394332
PC 38:3	0.98479	-0.022112	0.88516	1.0233	0.033234	0.96824	1.0939	0.12951	0.42718		0.0189511
PC 38:5	1.1752	0.23286	0.23587	1.1343	0.1818	0.27751	1.1585	0.21222	0.2263		0.0322374
PC 39:0	1.2764	0.35206	0.092719	1.333	0.41473	0.11275	1.1562	0.20942	0.52885		0.0573094
PC 39:1	0.74636	-0.42205	0.074455	0.96962	-0.044507	0.96824	1.414	0.49976	0.081984		0.0660068
PC 39:2	0.80139	-0.31943	0.035952	1.0649	0.090773	0.78019	1.1002	0.13771	0.68421		0.0686871
PC 39:3	0.95533	-0.065928	0.74299	1.1916	0.25284	0.31538	1.1622	0.21688	0.315		0.0267281
PC 39:5	1.2034	0.26711	0.32127	1.1633	0.21819	0.35623	1.2377	0.3076	0.096179		0.018565
PC 39:7	1.4366	0.52268	0.011107	1.0248	0.035369	0.78019	1.3215	0.40213	0.10512		0.0298745
PC 40:0	1.2943	0.37213	0.19959	1.336	0.41787	0.24281	1.0298	0.042313	0.93972		0.0244171
PC 40:5	1.0394	0.055781	0.88836	1.1146	0.15648	0.27751	1.1117	0.15282	0.73936		0.0248997
PC 40:7	1.1892	0.25004	0.092719	1.0003	0.00045736	0.90483	1.1011	0.13899	0.47251		0.0247183
PC 40:8	1.2927	0.37034	0.19959	1.0807	0.11202	0.60378	1.1602	0.21436	0.34452		0.0384522
PC 40:9	1.3087	0.38815	0.16717	0.98668	-0.019342	0.84211	1.0174	0.024894	0.48125		0.0348446
PC 41:2	0.75218	-0.41086	0.092719	1.1394	0.18822	0.54896	0.70863	-0.49689	0.075256		0.0293611
PC 41:5	0.91816	-0.12318	0.60584	1.2264	0.29443	0.31538	1.2747	0.35016	0.16549		0.0225966
PC 41:6	0.90283	-0.14748	0.27659	1.012	0.017206	0.66072	1.3052	0.38425	0.14314		0.0451582
PC 41:7	1.0445	0.062874	0.60584	0.94641	-0.079461	0.66072	1.2589	0.33213	0.19032		0.0345978
PC 42:2	0.84845	-0.2371	0.16717	1.1677	0.22363	0.24281	1.14	0.18909	0.4055		0.0353318
PC 42:3	0.83097	-0.26713	0.27659	1.1635	0.21853	0.24281	1.0503	0.07081	0.73936		0.0352815
PC 44:12	1.8229	0.86625	0.074455	1.1715	0.22836	0.54896	1.0386	0.054707	0.57874		0.0330734
PC O-16:0_20:3	0.91334	-0.13078	0.37038	1.0409	0.057862	0.96824	1.0593	0.083045	0.4055		0.0121858
PC O-16:0_22:3	0.94093	-0.087846	0.48071	0.88265	-0.18009	0.27751	1.0843	0.11681	0.57874		0.0513402
PC O-16:0_22:5	1.209	0.27385	0.16717	0.9127	-0.13178	0.84211	1.031	0.043982	0.59656		0.015991
PC O-16:0_22:6	1.39	0.47508	0.011107	0.9489	-0.075677	0.7197	0.90076	-0.15078	0.79594		0.0545501
PC O-16:1_22:5	1.2632	0.33713	0.074455	1.0206	0.02945	1	1.0624	0.087385	1		0.0116642
PC O-18:0_18:2	0.87356	-0.19502	0.13879	0.87149	-0.19844	0.60378	1.0634	0.0887	0.52885		0.0377274
PC O-18:0_20:3	0.9018	-0.14912	0.48071	0.80326	-0.31607	0.21102	1.0632	0.088386	0.63053		0.0411188
PC O-18:0_20:4	0.94016	-0.089024	0.96257	0.82283	-0.28134	0.54896	0.96123	-0.057052	0.79594		0.0388464
PC O-18:0_22:4	1.1419	0.19149	0.37038	0.80691	-0.30951	0.31538	0.98235	-0.025694	0.90969		0.0471173
PC O-18:0_22:6	1.189	0.24974	0.046401	0.85838	-0.2203	0.66072	1.0901	0.12446	0.57874		0.0182667
PC O-18:1_18:1	0.93186	-0.10182	0.74299	0.82478	-0.27791	0.1564	0.84163	-0.24874	0.19032		0.0198633
PC O-18:1_18:2	1.0162	0.023141	0.81481	0.90704	-0.14077	0.66072	0.9809	-0.02782	0.85343		0.0178863
PC O-18:1_20:4	1.2423	0.31302	0.13879	0.97363	-0.038555	0.84211	0.99346	-0.0094607	0.76228		0.0307699
PC O-18:1_22:1	1.3426	0.42507	0.19959	0.55626	-0.84618	0.078893	0.93624	-0.095056	0.87978		0.0435707
PC O-18:1_22:5	1.1602	0.21442	0.54142	0.7521	-0.411	0.11275	0.9694	-0.044842	0.73936		0.056522
PC O-18:2_20:4	1.0681	0.094995	0.74299	0.84559	-0.24197	0.1564	0.99731	-0.003885	0.9118		0.0577272
PC O-18:2_22:0	0.83978	-0.25191	0.67297	0.97787	-0.032281	0.96824	1.1687	0.22491	0.57874		0.0529078
PC O-20:0_20:4	1.1234	0.1679	0.27659	0.90012	-0.15181	0.27751	1.1411	0.1904	0.34452		0.0183755
PC O-20:0_22:5	1.0431	0.060819	0.74299	1.0232	0.033146	1	1.1599	0.21402	0.315		0.022738
PC O-20:2_20:4	1.271	0.34602	0.092719	0.91728	-0.12457	0.60378	1.0411	0.058085	0.79126		0.0231497
PC O-20:4_24:1	1.1351	0.18284	0.54142	1.0005	0.00079316	0.84211	0.99712	-0.0041575	1		0.0266218
PC O-22:0_20:4	1.0241	0.034339	0.42345	0.92544	-0.11178	0.54896	1.008	0.011481	1		0.0238661
PC O-22:1_20:4	1.3566	0.43998	0.074455	0.86468	-0.20976	0.23624	1.0226	0.032287	0.93972		0.0176727
PC O-22:2_20:4	1.2452	0.31642	0.60584	0.9881	-0.017277	0.68296	0.91574	-0.127	0.52885		0.0488757
PC O-25:1	1.1551	0.20803	0.54142	1.1245	0.16925	0.44697	1.0454	0.063994	0.85343		0.0450142
PC O-26:0	0.73555	-0.4431	0.027396	1.0513	0.072205	0.78019	0.99973	-0.00039184	0.47184		0.038849
PC O-28:0	0.85494	-0.22611	0.074455	1.059	0.082672	0.24281	0.9743	-0.03756	0.93972		0.0336087
PC O-30:0	0.99725	-0.0039729	0.88836	0.8822	-0.18083	0.18232	0.91124	-0.1341	0.36417		0.0288893
PC O-32:0	1.0122	0.01755	0.88836	0.84761	-0.23853	0.18232	0.8626	-0.21324	0.14314		0.0232046
PC O-32:1	1.0568	0.079696	0.60584	0.83716	-0.25642	0.1333	0.83049	-0.26796	0.096179		0.0179156
PC O-32:2	1.0831	0.1151	0.23587	0.89451	-0.16083	0.84211	0.8989	-0.15376	0.62305		0.0304297
PC O-32:3	1.2685	0.34316	0.19959	0.98834	-0.016923	0.84211	0.86233	-0.2137	0.73936		0.0473192
PC O-34:0	1.02	0.028572	0.67297	0.97262	-0.040044	0.78019	1.0167	0.023962	0.90969		0.0216787
PC O-34:1	1.0843	0.1167	0.42345	1.023	0.032746	0.96824	0.94887	-0.075722	0.52037		0.023049
PC O-34:2	0.95043	-0.073355	0.42345	0.89738	-0.1562	0.7197	1.0289	0.04109	0.63053		0.0359124
PC O-34:3	1.146	0.19665	0.13879	1.1379	0.18642	0.1333	0.95317	-0.069202	0.85343		0.0144831
PC O-34:4	1.4258	0.51175	0.007898	1.1474	0.19834	0.40018	0.99243	-0.010961	1		0.0374848
PC O-34:5	1.6546	0.7265	0.0015631	0.9561	-0.064767	0.96824	0.90916	-0.13739	0.70535		0.0645411
PC O-35:1	0.79747	-0.3265	0.32127	0.857	-0.22264	0.18232	0.8136	-0.2976	0.24745		0.0338543
PC O-35:2	0.99886	-0.0016434	1	0.92996	-0.10475	0.66072	1.1891	0.24993	0.35268		0.0334632
PC O-36:0	1.2048	0.26877	0.74299	0.93876	-0.091167	0.44697	1.1007	0.13842	0.5452		0.0866201
PC O-36:1	0.90017	-0.15173	0.37038	0.94971	-0.074439	0.84211	1.0993	0.13664	0.68421		0.0261485
PC O-36:4	1.2544	0.32698	0.046401	0.91276	-0.1317	0.4967	1.0477	0.067178	0.85343		0.0209817
PC O-36:5	1.3059	0.3851	0.027396	1.0931	0.12842	0.27751	1.0182	0.026012	0.9118		0.0235905
PC O-36:6	2.229	1.1564	8.2271e-05	0.88455	-0.17698	0.40018	1.5954	0.67394	0.019065		0.0482124
PC O-37:1	0.65489	-0.61068	0.092719	0.97825	-0.031729	0.78019	0.97141	-0.041841	0.96984		0.101056
PC O-38:0	1.0134	0.019231	0.96257	0.92217	-0.11689	0.4967	1.0489	0.06882	1		0.265518
PC O-38:1	0.98761	-0.01799	0.54142	1.0751	0.10449	1	0.98811	-0.017254	0.43587		0.0378464
PC O-38:2	0.99072	-0.013449	0.88836	0.90695	-0.1409	1	1.2265	0.29456	0.19032		0.0395368
PC O-38:4	1.0861	0.11917	0.42345	0.83919	-0.25293	0.66072	0.85967	-0.21815	0.19032		0.0250109
PC O-39:3	0.63265	-0.66051	0.059235	0.70077	-0.51299	0.017212	0.95976	-0.059247	0.90965		0.0998529
PC O-40:1	0.90527	-0.14358	0.54142	0.98806	-0.017329	1	1.0889	0.12287	0.43587		0.0354104
PC O-40:7	1.3193	0.39978	0.046401	0.87525	-0.19224	0.84211	0.99149	-0.012331	1		0.0212433
PC O-40:9	1.0869	0.12016	0.74299	1.1172	0.15986	0.84211	1.0452	0.063746	0.87978		0.0319198
PC O-41:1	1.0769	0.10684	0.19338	1.1929	0.25446	0.13057	0.84746	-0.23878	0.32539		0.0217994
PC O-42:3	0.79323	-0.33419	0.11394	0.91623	-0.12622	1	1.151	0.20288	0.35268		0.0259822
PC O-42:6	1.0202	0.028805	0.96257	0.88649	-0.17382	0.35623	1.3187	0.39907	0.14314		0.0201631
PC O-42:8	1.3013	0.37994	0.19959	0.87825	-0.1873	0.54896	0.94686	-0.078782	0.87978		0.0974924
PC O-44:4	1.0756	0.10509	0.96257	0.90918	-0.13737	0.7197	1.0383	0.05419	0.79594		0.141607
PC O-44:6	1.1567	0.21004	0.16717	1.3065	0.38572	0.053476	1.1401	0.18919	0.17346		0.0964587
PC O-44:8	1.0596	0.083495	1	0.78311	-0.35271	0.1564	0.91247	-0.13215	1		0.0356299
PC O-46:7	1.1032	0.14163	0.54142	0.90703	-0.14077	0.84211	1.1367	0.18484	0.27286		0.0443684
PE 14:0_20:4	0.9361	-0.095263	0.60584	0.87349	-0.19513	0.44697	0.89419	-0.16135	0.73936		0.116011
PE 16:0_20:4	0.96624	-0.049542	0.88836	0.95979	-0.059214	0.54896	1.2573	0.33032	0.028806		0.0638404
PE 16:0_22:5	1.2451	0.31626	0.27659	0.72521	-0.46353	0.90483	1.3022	0.38099	0.011496		0.0471665
PE 16:1_18:1	0.91837	-0.12286	0.60584	1.0438	0.061865	0.90248	1.2291	0.29758	0.08921		0.0520795
PE 17:0_18:2	1.1136	0.15529	0.60584	1.0781	0.10849	0.60378	1.0972	0.13378	0.9118		0.0554871
PE 18:0_18:1	0.82724	-0.27361	0.32127	1.0881	0.12185	0.84211	0.90675	-0.14122	0.48125		0.0569935
PE 18:0_18:2	0.92189	-0.11733	0.60584	0.91478	-0.12851	0.27751	0.91099	-0.13449	0.63053		0.0607817
PE 18:1_18:1	1.1074	0.14718	0.60584	1.1779	0.23617	0.27751	1.0344	0.048859	0.97051		0.0328708
PE 18:1_18:2	0.93458	-0.097612	0.60584	1.044	0.062093	0.83819	0.98601	-0.020321	1		0.0529033
PE 18:1_20:4	1.2164	0.28262	0.37038	0.77847	-0.36129	0.09472	1.2692	0.34393	0.0038862		0.0545939
PE 30:0	0.75377	-0.40781	0.11394	0.68455	-0.54676	0.78019	0.7392	-0.43597	0.19032		0.0440168
PE 30:1	0.62917	-0.66849	0.035952	0.90116	-0.15015	0.7197	1.0144	0.020634	0.79594		0.0339427
PE 32:1	0.71663	-0.48071	0.42345	1.4477	0.53376	0.74386	1.0575	0.080725	0.48125		0.0606386
PE 32:2	0.67938	-0.55771	0.16717	0.81799	-0.28985	0.35623	0.92458	-0.11313	1		0.0850288
PE 34:0	0.94867	-0.076025	0.74299	1.0036	0.005229	1	0.96433	-0.052406	0.73936		0.0520895
PE 34:1	0.82412	-0.27907	0.23587	1.2012	0.26446	0.65324	0.97115	-0.042233	0.97051		0.0655261
PE 34:2	0.90144	-0.1497	0.60584	0.96498	-0.051431	0.7197	1.1042	0.14306	0.57874		0.0503099
PE 36:5	1.3228	0.40361	0.13879	1.0644	0.090089	1	1.4465	0.53259	0.011496		0.054367
PE 38:4	1.1593	0.21319	0.19959	0.95355	-0.068616	0.65324	1.0842	0.11669	0.48125		0.0340524
PE 38:6	1.1312	0.17781	0.67297	0.84773	-0.23833	0.27751	1.3876	0.47259	0.01469		0.0766303
PE 40:4	1.459	0.54499	1	1.0678	0.094583	0.25279	1.1391	0.18789	0.10512		0.0782421
PE 40:5	1.069	0.09632	0.81481	0.58304	-0.77833	0.4967	1.2474	0.3189	0.035463		0.0592893
PE 40:6	0.98039	-0.028576	0.81481	0.76999	-0.37708	0.017212	1.2746	0.35009	0.27986		0.067355
PE O-16:0_18:2	0.78662	-0.34626	0.67297	0.95171	-0.071411	0.51344	1.2035	0.26721	0.43587		0.0429133
PE O-16:1_18:1	0.86092	-0.21604	0.27659	1.0924	0.12745	0.41401	1.0489	0.068815	0.85343		0.0725561
PE O-16:1_18:2	0.83107	-0.26697	0.27659	1.0267	0.038076	0.56746	0.98589	-0.020502	0.63053		0.0550613
PE O-16:1_20:3	0.99873	-0.0018386	0.74299	1.1729	0.23014	0.71318	1.2774	0.35318	0.68421		0.0465481
PE O-16:1_20:4	1.3602	0.44383	0.074455	1.281	0.3573	0.46224	0.96861	-0.046009	0.79594		0.0712487
PE O-16:1_22:5	1.2432	0.31401	0.16717	0.87094	-0.19935	0.1333	1.03	0.042636	0.85343		0.0658989
PE O-16:1_22:6	1.2718	0.34683	0.074455	1.0051	0.0073898	0.84211	0.95979	-0.059204	0.68421		0.0746354
PE O-18:0_16:0	0.94769	-0.077514	0.54142	0.81193	-0.30057	0.1333	0.90845	-0.13851	0.35268		0.0517506
PE O-18:0_22:4	0.95282	-0.069722	0.81481	0.75637	-0.40284	0.017212	0.99598	-0.0058071	0.79594		0.0615449
PE O-18:1_16:0	0.76621	-0.38418	0.23587	0.8973	-0.15634	0.84211	1.0527	0.07416	0.9118		0.0559007
PE O-18:1_18:2	0.89426	-0.16123	0.48071	1.1037	0.14237	0.28828	1.1323	0.17932	0.73936		0.0529627
PE O-18:1_20:4	1.3642	0.44809	0.027396	1.0046	0.0066462	0.90483	1.039	0.055249	0.9118		0.0654016
PE O-18:1_22:4	0.94223	-0.085855	0.60584	0.85053	-0.23356	0.065254	0.90736	-0.14026	0.52885		0.0640636
PE O-18:1_22:5	1.2127	0.27825	0.23587	0.96977	-0.04429	0.78019	1.0081	0.011606	0.97051		0.0638431
PE O-18:1_22:6	1.3634	0.44723	0.007898	0.99266	-0.010633	0.90483	1.045	0.063517	0.73936		0.0620232
PE O-18:2_18:1	0.88623	-0.17425	0.37038	1.0852	0.1179	0.48748	1.1033	0.14181	0.85343		0.0654168
PE O-18:2_18:2	1.0519	0.07302	0.74299	1.0674	0.094107	0.7197	1.0798	0.11083	0.85343		0.0703214
PE O-18:3_18:2	0.87411	-0.19412	0.60584	0.90862	-0.13825	0.78019	1.244	0.31502	0.73936		0.0558507
PE O-19:0_18:2	0.87996	-0.18448	0.059235	0.9686	-0.046022	0.41401	1.2276	0.2958	0.063013		0.0662566
PE O-20:0_18:1	0.96616	-0.049669	0.74299	0.86999	-0.20093	0.034987	1.2698	0.34464	0.028806		0.0511761
PE O-20:1_18:1	1.0179	0.025652	0.60584	1.076	0.10562	0.90248	1.2895	0.36681	0.27986		0.0502977
PE O-20:1_20:4	1.4727	0.55847	0.035952	1.0909	0.12556	0.1333	1.1199	0.16335	0.43587		0.0491129
PE O-20:1_22:6	1.4551	0.54109	0.0015631	0.89011	-0.16794	0.25279	1.1423	0.19199	0.24745		0.0818236
PE O-22:2_22:6	1.3648	0.44864	0.13879	0.89378	-0.162	0.66072	1.1775	0.23571	0.21756		0.0634637
PE O-38:4	1.2826	0.35911	0.092719	0.90815	-0.139	0.77496	0.99139	-0.012482	1		0.0518012
PG 14:0_16:0	0.79099	-0.33826	0.60584	0.86666	-0.20646	0.44697	0.96926	-0.045045	0.68421		0.051781
PG 14:0_18:1	0.69923	-0.51616	0.19959	0.92847	-0.10707	0.84211	1.058	0.08133	0.39305		0.0520272
PG 16:0_18:2	1.1002	0.13773	0.67297	0.87708	-0.18923	0.35623	0.93214	-0.10139	0.97051		0.104153
PG 16:0_18:2.1	0.89648	-0.15765	0.60584	1.0187	0.026729	0.7197	0.73819	-0.43793	0.028806		0.0587393
PG 18:0_18:2	0.82418	-0.27897	0.37038	0.78403	-0.35102	0.18232	0.84225	-0.24767	0.21756		0.03647
PG 18:1_18:1	1.2154	0.2814	0.074455	0.92399	-0.11405	0.90483	0.87001	-0.20089	0.63053		0.0753683
PG 18:1_18:2	1.169	0.22528	0.27659	1.0686	0.09575	0.60378	0.87878	-0.18643	0.48125		0.125588
PG 18:1_20:4	1.4697	0.55549	0.007898	1.0235	0.033483	0.84211	0.90002	-0.15197	0.97051		0.067733
PG 18:2_18:2	1.0302	0.042972	0.96257	0.83452	-0.26098	0.54896	0.97317	-0.03924	1		0.102916
PG 18:2_20:4	1.275	0.35052	0.074455	0.89983	-0.15228	0.60378	0.94662	-0.079145	0.79594		0.0610273
PG 20:4_20:4	1.378	0.46256	0.046401	0.7758	-0.36624	0.35623	0.94151	-0.086958	0.9118		0.0465823
PG 20:4_22:5	1.6064	0.68379	0.074455	0.88407	-0.17777	0.84211	1.0939	0.12946	0.68421		0.183822
PI 12:0_16:0	0.62824	-0.67062	0.046401	1.1951	0.25718	0.27751	0.66678	-0.58472	0.9118		0.0565679
PI 14:0_16:0	0.67928	-0.55793	0.046401	0.90672	-0.14126	0.4967	1.0069	0.0098771	1		0.066669
PI 14:0_18:2	0.8312	-0.26673	0.19959	1.1322	0.17909	0.78019	0.96896	-0.045489	0.97051		0.0625815
PI 14:0_20:4	1.0271	0.038592	0.67297	1.05	0.070376	0.90483	1.1491	0.20049	0.315		0.0460531
PI 16:0_14:1	0.66476	-0.58911	0.13879	1.0298	0.042304	0.60378	0.8184	-0.28912	0.68421		0.0392774
PI 16:0_16:0	0.63126	-0.66369	0.074455	0.96027	-0.058488	0.90483	0.68888	-0.53768	0.43587		0.0629802
PI 16:0_20:3	1.05	0.070389	0.60584	1.2879	0.36507	0.96824	1.4501	0.53619	0.14314		0.0893873
PI 16:0_20:4	1.2242	0.29187	0.13879	0.96069	-0.057864	1	1.111	0.15187	0.35268		0.0423757
PI 16:0_22:6	1.3842	0.46907	0.046401	0.90349	-0.14643	0.35623	1.1756	0.23338	0.43587		0.0460278
PI 16:1_18:1	0.97494	-0.036622	0.96257	1.1216	0.1655	0.60378	0.92115	-0.11849	0.73936		0.0199945
PI 17:0_20:4	1.3296	0.41101	0.02065	0.96283	-0.054646	0.90483	1.3247	0.40567	0.023231		0.0303351
PI 18:0_18:1	0.93045	-0.10399	0.81481	1.2173	0.28363	0.54896	0.9363	-0.094958	0.68421		0.111056
PI 18:0_18:2	1.0084	0.012061	0.88836	1.1546	0.20744	0.4967	0.87653	-0.19012	0.79594		0.061033
PI 18:0_20:2	0.84519	-0.24266	0.48071	1.1809	0.23993	0.90483	1.2403	0.31065	0.35268		0.0630806
PI 18:0_20:3	1.1756	0.23343	0.37038	1.1194	0.16268	1	1.6864	0.75397	0.043257		0.0511689
PI 18:0_20:4	1.3391	0.42126	0.02065	0.9239	-0.1142	0.40018	1.1544	0.20717	0.19032		0.0588558
PI 18:0_22:5	1.416	0.50186	0.035952	1.1612	0.21559	0.78019	1.221	0.28811	0.16549		0.0269702
PI 18:0_22:6	1.4048	0.49042	0.19959	0.93501	-0.096948	0.54896	1.167	0.22281	0.35268		0.0561786
PI 18:1_18:1	1.0623	0.087252	0.67297	0.96559	-0.05051	0.4967	1.1989	0.26169	0.39305		0.0476994
PI 18:1_18:2	1.0468	0.065932	0.37038	1.0292	0.041515	0.84211	0.9768	-0.033869	0.85343		0.0540702
PI 18:1_20:3	1.1779	0.23619	0.19959	1.2194	0.28622	0.66072	1.4269	0.51291	0.16549		0.0583423
PI 18:1_20:4	1.342	0.42435	0.027396	0.95657	-0.064053	0.84211	1.1609	0.21525	0.12301		0.0493272
PI 18:2_18:2	1.1465	0.19728	0.67297	1.058	0.081328	0.96824	1.0974	0.13406	0.63053		0.147192
PI 18:2_20:4	1.39	0.47507	0.13879	0.9433	-0.084205	0.66072	1.0621	0.086903	0.63053		0.0940839
PI 32:1	0.86684	-0.20617	0.60584	1.3153	0.39537	0.60378	1.01	0.014388	0.97051		0.0502988
PI 34:1	0.8023	-0.31779	0.54142	1.0661	0.09234	0.96824	0.96886	-0.045637	0.9118		0.0496108
PS 36:2	1.695	0.76131	0.32127	2.4691	1.304	0.90483	0.68583	-0.54409	0.63053		0.128588
PS 38:4	1.843	0.88209	0.54142	2.1802	1.1245	0.90483	0.68555	-0.54467	0.19032		0.0990862
PS 38:6	0.94094	-0.087832	0.81481	1.7724	0.82567	0.1333	0.70499	-0.50432	0.16549		0.0583442
SE 28:1/18:1	1.3613	0.44503	0.13879	1.1126	0.15396	1	0.98882	-0.016222	0.68421		0.0290751
SE 28:1/20:3	1.3527	0.43588	0.027396	1.2183	0.28483	0.027929	1.1631	0.218	0.35268		0.0202102
SE 28:1/20:4	1.987	0.99059	0.00016454	1.0771	0.10709	0.40018	1.0351	0.049829	0.9118		0.0248809
SE 28:1/22:6	1.1548	0.2077	0.035952	1.0753	0.10476	0.54896	1.1443	0.19452	0.21756		0.0235393
SE 28:2/20:4	1.2395	0.30975	0.074455	1.0516	0.072572	0.66072	1.0849	0.1176	0.52885		0.0329684
SE 29:1/18:2	1.1368	0.18497	0.32127	1.0005	0.00071189	1	1.0461	0.064968	0.97051		0.0308363
SE 29:1/20:4	1.5483	0.63071	0.0015631	1.0095	0.013581	0.96824	1.0166	0.023701	0.9118		0.0600816
SL 17:0;O/16:1	1.5473	0.62973	0.074455	1.1255	0.17059	1	1.6729	0.74231	0.063013		0.031121
SL 17:0;O/16:1;O	1.5076	0.59222	0.046401	1.0668	0.093228	0.84211	1.3639	0.44776	0.35268		0.0531167
SM 28:0;2O	0.90736	-0.14026	0.54142	1.0756	0.10509	0.46204	0.8067	-0.3099	0.62305		0.0634133
SM 28:1;2O	0.90487	-0.14422	0.67297	0.91031	-0.13557	0.48748	0.78711	-0.34536	0.075256		0.0529077
SM 29:1;2O	1.1917	0.253	0.42345	1.0788	0.10946	0.31538	1.0055	0.00791	0.97051		0.0626808
SM 30:0;2O	1.0758	0.10544	0.48071	1.0639	0.089301	0.4967	0.88359	-0.17854	0.68421		0.0501791
SM 30:1;2O	1.1937	0.2554	0.42345	1.1544	0.2071	0.21102	0.94526	-0.081223	0.79594		0.054541
SM 30:2;2O	1.2362	0.30592	0.54142	0.94856	-0.076194	1	0.97396	-0.038064	0.97051		0.0516598
SM 31:1;2O	1.2878	0.36492	0.059235	1.2799	0.35606	0.1564	0.98892	-0.016081	1		0.0425058
SM 32:0;2O	1.1101	0.15066	0.37038	0.9552	-0.066119	0.90483	0.91973	-0.12072	0.68421		0.0389039
SM 32:1;2O	1.2116	0.27694	0.27659	1.0619	0.086705	0.84211	0.97205	-0.040905	0.97051		0.0471011
SM 32:1;3O	1.1038	0.14253	0.37038	1.0794	0.11021	0.66072	1.0003	0.00047401	0.97051		0.0351833
SM 32:2;2O	1.3437	0.42618	0.059235	1.1841	0.2438	0.21102	1.0502	0.070705	0.52885		0.0507466
SM 33:1;2O	1.3224	0.40315	0.01522	1.0614	0.085988	0.44697	1.0454	0.064004	0.79594		0.0430119
SM 33:1;3O	1.9537	0.96622	0.0024681	1.1876	0.24811	0.1333	1.0339	0.048043	0.68421		0.0517233
SM 34:0;2O	1.2114	0.27663	0.046401	1.0135	0.019388	0.84211	0.99279	-0.010441	0.85343		0.0538064
SM 34:1;2O	1.1112	0.15207	0.42345	1.0194	0.027746	0.60378	0.9822	-0.025906	0.48125		0.0437845
SM 34:1;3O	1.0556	0.078102	0.74299	0.95309	-0.069314	0.84211	0.9829	-0.024888	0.79594		0.0525759
SM 34:2;2O	1.325	0.40594	0.027396	0.97881	-0.0309	0.96824	1.0048	0.0069352	0.97051		0.0449524
SM 34:2;3O	0.9839	-0.023414	0.74299	0.9301	-0.10454	0.40018	0.98925	-0.015586	0.85343		0.0737684
SM 35:1;2O	1.4402	0.52627	0.0015631	0.92151	-0.11793	0.84211	1.0489	0.06887	0.57874		0.0385282
SM 35:2;2O	1.4205	0.50637	0.0037022	0.95964	-0.059436	0.96824	1.0555	0.077881	0.9118		0.054643
SM 36:1;2O	1.6728	0.74226	0.0037022	0.9059	-0.14258	0.7197	0.92711	-0.10919	0.9118		0.0345299
SM 36:2;2O	1.4373	0.52341	0.027396	0.79627	-0.32866	0.21102	1.0742	0.10327	0.68421		0.0230579
SM 36:3;2O	1.354	0.43727	0.16717	0.99732	-0.00387	0.78019	1.1395	0.18837	0.19032		0.0565669
SM 37:1;2O	1.4384	0.5245	0.0055121	0.93491	-0.097095	0.78019	1.0978	0.13461	0.68421		0.0397855
SM 38:0;2O	1.5527	0.63481	0.059235	1.1891	0.2499	0.40018	1.0027	0.0039537	1		0.0380485
SM 38:1;2O	1.3816	0.46633	0.0055121	0.91523	-0.12779	0.24281	1.0128	0.018411	0.79594		0.0528615
SM 39:1;2O	1.0267	0.037999	0.81481	0.98393	-0.023367	0.84211	1.0263	0.037386	0.52885		0.0518566
SM 40:0;2O	1.2118	0.27718	0.54142	1.1238	0.16837	0.66072	1.03	0.04258	0.9118		0.04216
SM 40:0;3O	1.4575	0.54353	0.046401	1.1315	0.17829	0.54896	0.96921	-0.045113	0.52885		0.0540494
SM 40:1;2O	1.1198	0.16329	0.42345	0.92209	-0.11702	0.27751	0.96308	-0.054279	0.57874		0.042282
SM 40:2;2O	1.3698	0.45394	0.059235	1.0712	0.099264	0.4967	1.1071	0.14672	0.48125		0.0406811
SM 40:2;2O.1	1.2144	0.28029	0.027396	1.0094	0.013551	0.96824	0.95954	-0.059584	0.68421		0.0379684
SM 41:0;2O	1.3441	0.42666	0.23587	1.0885	0.12229	0.44697	1.1727	0.22986	0.48125		0.0573841
SM 41:0;3O	1.5145	0.59884	8.2271e-05	1.1243	0.16896	0.7197	1.106	0.14534	0.43587		0.0563925
SM 41:1;2O	1.2394	0.30959	0.092719	0.93008	-0.10457	0.7197	1.0161	0.023098	0.85343		0.0417422
SM 41:2;2O	1.2166	0.2829	0.074455	1.0922	0.12728	0.31538	1.0978	0.1346	0.48125		0.0477091
SM 41:2;2O.1	1.1557	0.20882	0.27659	0.97786	-0.032296	0.96824	1.0849	0.11752	0.35268		0.0479952
SM 41:3;2O	1.5108	0.59532	0.01522	1.0498	0.070169	0.60378	1.0389	0.055025	0.73936		0.041514
SM 41:6;2O	1.5346	0.61784	0.059235	0.86377	-0.21128	0.44697	1.0599	0.083987	0.27986		0.0585424
SM 42:0;2O	1.0271	0.038519	0.67297	1.1191	0.16236	0.78019	1.0082	0.011851	0.73936		0.0889516
SM 42:0;3O	1.4772	0.56287	0.035952	0.93661	-0.094487	0.24281	0.95953	-0.059595	0.73936		0.0492112
SM 42:1;2O	1.1404	0.18951	0.32127	0.99462	-0.0077831	0.96824	1.0286	0.040749	0.85343		0.048242
SM 42:1;3O	1.4305	0.51655	0.00098725	1.0557	0.078143	0.7197	1.1404	0.18959	0.14314		0.0453664
SM 42:2;2O	1.072	0.10032	0.60584	1.0516	0.072534	0.44697	1.0534	0.075039	0.63053		0.0376917
SM 42:3;2O	1.1111	0.15204	0.16717	1.0094	0.013529	0.7197	0.9693	-0.044977	0.63053		0.0370415
SM 42:3;3O	1.4369	0.52293	0.059235	1.2409	0.31137	0.078893	0.82929	-0.27006	0.39305		0.0427352
SM 42:5;2O	2.4771	1.3086	0.035952	0.99383	-0.0089281	0.96824	1.1911	0.25234	0.19032		0.0394967
SM 43:1;2O	0.87832	-0.18718	0.88836	1.0089	0.012784	1	1.0177	0.025266	0.68421		0.0638773
SM 43:2;2O	1.1197	0.16312	0.27659	0.93638	-0.094829	0.4967	1.2125	0.27797	0.063013		0.0421132
SM 43:3;2O	1.6165	0.69286	0.027396	0.87581	-0.19131	0.35623	1.2705	0.34545	0.12301		0.0614438
SM 44:1;2O	1.1868	0.24707	0.48071	1.175	0.23267	0.44697	1.0045	0.0064464	1		0.0370599
SM 44:2;2O	1.0963	0.13265	0.48071	1.2159	0.28201	0.21102	1.1138	0.15554	0.73936		0.0505005
SM 44:3;2O	1.09	0.1243	0.67297	0.98793	-0.017515	0.96824	1.045	0.063495	0.57874		0.0460383
SM 44:5;2O	1.5555	0.63736	0.67297	0.96023	-0.058547	0.84211	0.96799	-0.046937	0.97051		0.0745761
SM 46:6;2O	1.6152	0.69168	0.074455	0.99434	-0.0081903	0.96824	0.89176	-0.16527	0.16549		0.0409074
ST 27:1;O;S	1.1587	0.21256	0.23587	0.89887	-0.15381	1	0.92492	-0.11259	0.43587		0.0889453
ST 28:1;O;S	1.4549	0.54088	0.01522	1.0646	0.090379	0.27751	1.0224	0.031901	0.97051		0.0247802
ST 28:2;O;S	1.4994	0.58443	0.0055121	1.0688	0.095981	0.18232	1.0009	0.0013453	0.97051		0.0237553
ST 29:1;O;S	1.5537	0.63575	0.059235	0.94013	-0.089074	0.90483	1.0425	0.060094	0.79594		0.0259158
TG 12:0_16:0_22:6	0.79482	-0.33131	0.37038	0.9074	-0.14019	1	0.87817	-0.18742	0.73936		0.0213417
TG 12:0_18:2_20:4	0.41015	-1.2858	0.11394	1.0635	0.088847	0.7197	0.99602	-0.0057509	0.9118		0.0248319
TG 14:0_16:0_22:6	0.72282	-0.4683	0.32127	1.0234	0.03337	0.84211	0.95955	-0.059565	0.68421		0.0212039
TG 16:0_17:0_18:1	0.5222	-0.93733	0.074455	1.1252	0.17023	0.96824	0.82382	-0.2796	0.21756		0.0153456
TG 16:0_18:1_22:6	0.70256	-0.50931	0.23587	0.85464	-0.22662	1	1.2497	0.32158	0.52885		0.023644
TG 16:0_18:2_20:4	0.59047	-0.76007	0.11394	0.99857	-0.0020593	0.60378	1.0493	0.069456	0.85343		0.0225874
TG 17:1_18:2_18:2	0.58458	-0.77452	0.035952	0.87331	-0.19543	0.84211	0.97992	-0.029266	0.43587		0.0239756
TG 18:1_18:2_23:0	0.64567	-0.63113	0.27659	1.1637	0.21868	0.54896	0.9767	-0.034017	0.73936		0.044084
TG 18:2_18:2_23:0	0.42189	-1.245	0.059235	1.1652	0.22062	0.54896	0.99266	-0.010627	0.52885		0.0275153
TG 18:2_18:3_18:3	0.66122	-0.5968	0.13879	1.1132	0.15477	0.44697	1.752	0.80897	0.075256		0.0478363
TG 32:0	0.64924	-0.62317	0.23587	0.58759	-0.76712	1	0.60408	-0.72718	0.87969		0.258469
TG 34:0	0.6961	-0.52264	0.32127	0.65332	-0.61413	0.60378	0.36012	-1.4734	0.79594		0.0242842
TG 35:0	0.60399	-0.72741	0.16717	1.0662	0.092445	0.71306	0.99797	-0.0029303	0.96984		0.0525344
TG 36:0	0.73005	-0.45393	0.37038	0.49001	-1.0291	0.7197	0.39668	-1.3339	0.93972		0.049249
TG 37:0	0.65723	-0.60553	0.27659	1.3598	0.4434	0.90483	0.63945	-0.64509	0.15077		0.0260311
TG 38:0	0.73365	-0.44683	0.27659	0.42751	-1.226	0.84211	0.48896	-1.0322	0.9118		0.0324101
TG 38:1	0.61711	-0.6964	0.059235	0.39246	-1.3494	0.31538	0.52171	-0.93868	0.4055		0.0247119
TG 39:0	0.70308	-0.50824	0.32127	1.151	0.20295	0.96824	0.52083	-0.94112	0.38449		0.0415533
TG 40:0	0.73835	-0.43762	0.42345	0.75159	-0.41197	0.84211	0.66283	-0.59328	0.85343		0.0214683
TG 40:2	0.71745	-0.47905	0.42345	0.86745	-0.20514	0.60378	0.6296	-0.6675	0.59656		0.0224573
TG 40:3	0.62675	-0.67405	0.23587	2.0998	1.0703	0.60378	1.5177	0.60187	0.52037		0.0726768
TG 41:0	0.79629	-0.32864	1	1.0601	0.084173	0.80641	0.76484	-0.38677	0.49613		0.0540371
TG 41:1	0.69127	-0.53267	0.37038	0.724	-0.46593	0.7197	0.66503	-0.5885	0.68421		0.0293239
TG 41:2	0.68205	-0.55205	0.42345	0.98273	-0.025135	0.96824	0.78333	-0.3523	0.57046		0.0386902
TG 42:0	0.81359	-0.29762	0.67297	0.93937	-0.090241	0.7197	0.89613	-0.15822	0.9118		0.0357009
TG 42:1	0.67775	-0.56117	0.11394	0.59456	-0.75011	0.84211	0.80384	-0.31502	0.90969		0.0887957
TG 42:2	0.76866	-0.37959	0.42345	0.71825	-0.47744	0.66072	0.63752	-0.64945	0.57061		0.0178092
TG 43:0	0.5461	-0.87275	0.092719	0.67773	-0.56123	0.40018	0.6922	-0.53073	0.52885		0.0200081
TG 43:1	0.61574	-0.6996	0.23587	0.63494	-0.65531	0.54896	0.82225	-0.28236	0.93972		0.0190494
TG 43:2	0.61458	-0.70233	0.23587	1.0546	0.076763	0.96824	0.78363	-0.35176	0.48125		0.0474981
TG 44:0	0.85136	-0.23215	0.74299	0.82492	-0.27768	0.54896	0.75461	-0.40619	0.79126		0.0150161
TG 44:1	0.71359	-0.48683	0.37038	1.0166	0.023701	0.96824	0.84831	-0.23734	0.57061		0.0291307
TG 44:2	0.64368	-0.63559	0.16717	1.0054	0.0077562	0.60378	0.84545	-0.2422	0.85005		0.0118497
TG 44:3	1.081	0.11232	0.42345	1.0819	0.11356	0.44697	0.63281	-0.66015	0.053812		0.0270896
TG 45:1	0.64144	-0.6406	0.13879	0.85626	-0.22387	0.21102	0.96333	-0.053894	0.93972		0.0177589
TG 45:2	0.59184	-0.75672	0.092719	0.82577	-0.27619	0.66072	0.99403	-0.0086452	0.93972		0.0187345
TG 46:0	0.86402	-0.21087	0.81481	1.1092	0.14953	0.84211	0.84611	-0.24108	1		0.0112227
TG 46:1	0.64235	-0.63857	0.19959	1.6134	0.69014	0.84211	0.75264	-0.40997	0.49613		0.0199349
TG 46:3	0.73236	-0.44938	0.42345	1.0399	0.056505	0.44697	0.83294	-0.26372	0.44952		0.0320089
TG 46:5	0.79023	-0.33965	0.37038	1.1886	0.24923	0.66072	0.55258	-0.85576	0.18571		0.0360924
TG 46:6	1.1678	0.22383	1	0.84373	-0.24515	0.83819	0.53848	-0.89304	0.38449		0.0211418
TG 47:1	0.61783	-0.69472	0.13879	1.1569	0.21024	0.78019	0.83091	-0.26724	0.57874		0.0203222
TG 47:2	0.576	-0.79585	0.19959	0.93611	-0.095256	0.31538	0.88195	-0.18124	0.57874		0.0210446
TG 47:3	0.54332	-0.88013	0.074455	0.95925	-0.060022	0.7197	0.82702	-0.27401	0.315		0.0618975
TG 47:5	0.54609	-0.87278	0.19959	1.09	0.12432	0.48729	0.95065	-0.073014	0.67713		0.0627058
TG 48:0	0.72191	-0.4701	0.37038	1.1981	0.26075	0.34753	0.88478	-0.17662	0.68421		0.015676
TG 48:1	0.61291	-0.70626	0.074455	1.469	0.5548	0.78019	0.75619	-0.40318	0.19032		0.0120374
TG 48:6	1.0292	0.041554	0.81481	1.0307	0.043656	0.62405	0.70621	-0.50182	0.24114		0.0233909
TG 49:1	0.63602	-0.65286	0.13879	1.152	0.20413	0.90483	0.88787	-0.17158	0.48125		0.012851
TG 49:3	0.54616	-0.87261	0.13879	1.0782	0.10862	0.90483	0.87255	-0.19669	0.24745		0.0202624
TG 50:0	0.63877	-0.64663	0.19959	1.0011	0.0016145	0.54896	0.98604	-0.02028	0.97051		0.0145506
TG 50:1	0.73646	-0.44133	0.046401	1.0567	0.079533	0.4967	1.0814	0.11288	0.17346		0.0173038
TG 50:2	0.7313	-0.45147	0.035952	1.146	0.19659	0.78019	0.84412	-0.24447	0.14032		0.00838003
TG 50:3	0.7428	-0.42896	0.37038	1.1955	0.25758	0.7197	0.83082	-0.2674	0.12301		0.0138201
TG 50:5	0.47359	-1.0783	0.074455	1.0791	0.10978	0.54896	1.0577	0.080917	0.76228		0.0282319
TG 51:1	0.5222	-0.93733	0.074455	1.1252	0.17023	0.96824	0.82382	-0.2796	0.21756		0.0153456
TG 51:2	0.63691	-0.65085	0.092719	1.0682	0.095247	0.84211	0.87158	-0.1983	0.43587		0.0126052
TG 51:3	0.55824	-0.84105	0.059235	0.97652	-0.034283	0.78019	0.89456	-0.16076	0.39305		0.0149329
TG 51:4	0.4286	-1.2223	0.01522	0.86607	-0.20745	0.90483	0.9881	-0.017277	0.57874		0.0258216
TG 51:5	0.45085	-1.1493	0.16717	1.0208	0.029656	0.78019	0.91785	-0.12366	0.43587		0.098851
TG 52:0	0.66522	-0.58809	0.32127	0.98154	-0.026875	0.44697	0.99208	-0.011476	0.9118		0.0090176
TG 52:1	0.52846	-0.92014	0.092719	1.1478	0.19887	0.78019	0.74542	-0.42388	0.21756		0.0219746
TG 52:5	0.53285	-0.90819	0.11394	1.049	0.068965	0.78019	1.1434	0.19339	0.35268		0.0926295
TG 52:6	0.60913	-0.71517	0.27659	1.182	0.24124	0.66072	0.90431	-0.14512	0.68421		0.0128145
TG 52:6.1	0.6631	-0.59271	0.48071	0.84289	-0.24659	0.78019	1.1488	0.20013	0.39305		0.0207419
TG 52:7	0.47645	-1.0696	0.32127	0.8651	-0.20906	0.84211	1.2247	0.29245	0.35268		0.128877
TG 53:1	0.55334	-0.85377	0.11394	0.94083	-0.087994	0.96824	0.90654	-0.14155	0.97051		0.0163633
TG 53:2	0.51255	-0.96423	0.02065	1.0294	0.041824	0.96824	0.8005	-0.32103	0.25666		0.0240109
TG 53:3	0.68421	-0.54748	0.16717	0.95347	-0.068744	0.78019	0.85436	-0.22709	0.15077		0.0138327
TG 53:4	0.6312	-0.66384	0.011107	0.86695	-0.20597	0.84211	0.93161	-0.1022	0.39305		0.0155073
TG 53:5	0.59168	-0.75712	0.035952	0.87343	-0.19523	0.84211	0.62286	-0.68302	0.028806		0.0246183
TG 54:0	0.67211	-0.57324	0.19959	1.0255	0.036384	0.54896	0.88599	-0.17464	0.315		0.0301287
TG 54:1	0.55923	-0.83848	0.13879	1.0921	0.12713	0.4967	0.72031	-0.47331	0.21212		0.0308033
TG 54:2	0.54175	-0.8843	0.027396	1.0139	0.01985	0.78019	0.7144	-0.48519	0.12301		0.0148324
TG 54:3	0.90453	-0.14477	0.23587	0.95595	-0.064997	0.96824	0.84232	-0.24756	0.075256		0.0416189
TG 54:4	0.66471	-0.58921	0.02065	0.94851	-0.076269	0.90483	0.76762	-0.38153	0.063013		0.0115471
TG 54:5	0.60366	-0.72818	0.059235	1.1095	0.14993	0.60378	0.93704	-0.093812	0.24114		0.0261417
TG 54:7	0.40893	-1.2901	0.059235	0.89046	-0.16737	1	0.82665	-0.27465	0.39305		0.0237034
TG 54:8	0.40359	-1.309	0.074455	0.6545	-0.61155	0.96824	1.2029	0.26655	0.28974		0.0281151
TG 55:1	0.67121	-0.57515	0.23587	0.94276	-0.085036	1	0.92319	-0.1153	0.65002		0.0177209
TG 55:2	0.53857	-0.89279	0.02065	0.9668	-0.048709	0.66072	0.83376	-0.26229	0.52885		0.0167046
TG 55:3	0.56024	-0.83588	0.01522	0.97008	-0.043832	0.90483	0.98348	-0.024031	0.70535		0.0153222
TG 55:4	0.65871	-0.60227	0.027396	0.94698	-0.07859	0.66072	0.86274	-0.213	0.19032		0.0145081
TG 55:5	0.70899	-0.49615	0.02065	1.029	0.041273	0.66072	0.94769	-0.077519	0.57874		0.0195258
TG 55:6	0.67274	-0.57188	0.13879	1.1042	0.143	0.60378	1.0468	0.065946	0.49613		0.0523231
TG 56:1	0.70035	-0.51385	0.32127	0.98683	-0.019121	0.78019	0.6404	-0.64296	0.063013		0.0120326
TG 56:10	0.52525	-0.92892	0.27659	0.99918	-0.0011816	0.84211	1.1244	0.16916	0.59656		0.0311529
TG 56:2	0.48889	-1.0324	0.035952	1.1897	0.25058	0.31538	0.66645	-0.58542	0.13043		0.262732
TG 56:3	0.5447	-0.87647	0.0037022	1.0379	0.053681	0.60378	0.70891	-0.49632	0.15077		0.0209782
TG 56:5	1.0235	0.033463	0.67297	0.9867	-0.019312	0.84211	0.87902	-0.18603	0.65002		0.0284075
TG 56:9	0.48629	-1.0401	0.23587	0.8397	-0.25205	0.78019	1.1784	0.23685	0.25666		0.0229548
TG 57:1	0.72695	-0.46008	0.11394	0.91303	-0.13126	0.90483	0.79895	-0.32383	0.35268		0.101669
TG 57:2	0.53763	-0.89533	0.059235	1.032	0.04544	0.66072	0.83864	-0.25388	0.73363		0.0177069
TG 57:3	0.67746	-0.5618	0.092719	0.93234	-0.10108	0.90483	0.81597	-0.29341	0.52885		0.0647622
TG 57:4	0.61199	-0.70842	0.074455	1.0602	0.084302	0.7197	0.72811	-0.45777	0.30731		0.073786
TG 57:6	0.67617	-0.56453	0.046401	1.0759	0.10552	0.7197	0.98153	-0.026889	0.63053		0.0201014
TG 57:7	0.81056	-0.30301	0.32127	0.95051	-0.073229	0.96824	0.94313	-0.084467	0.70535		0.0334799
TG 57:8	0.69992	-0.51474	0.23587	0.79475	-0.33143	0.96824	1.0983	0.13531	0.59656		0.0334027
TG 57:9	0.90927	-0.13722	0.81481	0.87289	-0.19612	0.78019	0.88489	-0.17643	0.44952		0.0292734
TG 58:1	0.73472	-0.44474	0.32127	1.1612	0.21565	0.44697	0.66548	-0.58753	0.16549		0.177764
TG 58:10	0.42269	-1.2423	0.11394	0.83715	-0.25645	0.84211	1.2038	0.2676	0.39305		0.0242886
TG 58:12	0.7695	-0.37801	0.23587	0.99851	-0.0021445	0.78019	1.2407	0.31119	0.49613		0.0288523
TG 58:2	0.46174	-1.1149	0.059235	1.2347	0.30421	0.35623	0.65956	-0.60043	0.21212		0.265928
TG 58:3	0.43286	-1.208	0.01522	1.5054	0.59019	0.1333	0.54854	-0.86633	0.043257		0.0400411
TG 58:4	0.46564	-1.1027	0.011107	1.2913	0.36877	0.24281	0.61226	-0.70779	0.063922		0.0596353
TG 58:5	0.55953	-0.83772	0.00098725	1.2313	0.30013	0.40018	0.66354	-0.59175	0.028306		0.0329906
TG 58:6	0.71023	-0.49364	0.13879	1.0366	0.051879	0.66072	0.78103	-0.35656	0.14314		0.0430745
TG 58:7	0.78912	-0.34169	0.074455	1.0405	0.057331	0.4967	0.86036	-0.21699	0.47251		0.0575167
TG 58:8	0.72179	-0.47034	0.54142	0.93384	-0.098749	0.78019	0.96166	-0.056403	0.62305		0.0207856
TG 59:1	0.81923	-0.28765	0.67297	0.8701	-0.20075	0.84211	0.78491	-0.3494	0.57874		0.0143382
TG 59:2	0.69661	-0.52157	0.16717	0.87058	-0.19995	0.78019	0.75386	-0.40763	0.36417		0.0187915
TG 59:5	0.46529	-1.1038	0.0037022	1.0641	0.089683	0.4967	0.75898	-0.39788	0.59656		0.0442809
TG 59:7	0.74293	-0.4287	0.11394	1.0083	0.011897	0.96824	1.0132	0.018871	0.97051		0.0662214
TG 60:1	0.57182	-0.80637	0.19959	1.0332	0.047075	0.66072	0.68081	-0.55467	0.35268		0.121529
TG 60:10	0.78751	-0.34462	0.60584	1.0869	0.12016	0.35623	0.99622	-0.0054622	0.93972		0.0421401
TG 60:2	0.57905	-0.78825	0.16717	1.1504	0.2022	0.44697	0.62672	-0.67411	0.16181		0.0195336
TG 60:3	0.62637	-0.67491	0.19959	1.1643	0.21948	0.7197	0.44125	-1.1803	0.035463		0.0268231
TG 60:4	0.4064	-1.299	0.01522	1.362	0.44567	0.1564	0.60496	-0.72508	0.075256		0.0205037
TG 60:5	0.4813	-1.055	0.00057589	1.5108	0.59528	0.21102	0.57948	-0.78716	0.096179		0.0219009
TG 60:6	0.45236	-1.1444	0.00098725	0.96385	-0.053114	0.84211	0.54656	-0.87156	0.16181		0.0276023
TG 60:7	0.66838	-0.58125	0.059235	0.84448	-0.24387	0.96824	0.67955	-0.55735	0.08921		0.0140414
TG 60:8	0.71454	-0.48492	0.11394	0.88962	-0.16873	1	0.74596	-0.42282	0.18571		0.0384848
TG 60:9	0.73455	-0.44507	0.19959	1.0351	0.049778	0.60378	0.92982	-0.10498	0.39305		0.019259
TG 61:1	0.74752	-0.41981	0.37038	0.84485	-0.24324	0.84211	0.8269	-0.27421	0.73936		0.0169535
TG 61:2	0.55998	-0.83654	0.092719	1.0807	0.11201	0.84211	0.85604	-0.22425	0.73363		0.0108842
TG 61:3	0.66653	-0.58526	0.19959	1.1508	0.20265	0.40018	0.71358	-0.48686	0.48125		0.0784273
TG 62:10	0.60301	-0.72976	0.11394	1.1783	0.23665	0.35623	0.77577	-0.3663	0.14032		0.0326415
TG 62:11	0.7735	-0.37053	0.42345	1.0846	0.11715	0.66072	0.88797	-0.17142	0.73936		0.0138922
TG 62:13	0.78271	-0.35345	0.54142	0.77821	-0.36176	0.60378	1.0566	0.079461	0.85005		0.0310373
TG 62:14	0.79548	-0.3301	0.23587	0.74785	-0.41917	0.24281	1.7691	0.82301	0.028306		0.0194057
TG 62:2	0.60636	-0.72176	0.19959	1.1125	0.15378	0.60378	0.92366	-0.11457	0.70535		0.0316477
TG 62:3	0.54663	-0.87137	0.092719	1.2864	0.36334	0.31538	0.69278	-0.52953	0.44952		0.0755859
TG 62:4	0.36417	-1.4573	0.046401	1.6621	0.73298	0.043474	0.64842	-0.625	0.25666		0.0491833
TG 62:8	0.64968	-0.6222	0.092719	0.89725	-0.15641	0.96824	0.58605	-0.77092	0.041174		0.0200232
TG 62:9	0.68119	-0.55387	0.059235	1.1607	0.21504	0.21102	0.72584	-0.46227	0.08921		0.0155849
TG 64:1	0.6147	-0.70205	0.19959	1.0344	0.0488	0.60378	0.8383	-0.25446	0.70535		0.228628
TG 64:10	0.70507	-0.50416	0.13879	1.1258	0.17099	0.35623	0.71746	-0.47903	0.19032		0.0364282
TG 64:11	0.81596	-0.29343	0.092719	1.0496	0.069852	0.4967	0.75419	-0.407	0.34452		0.0296104
TG 64:12	0.73107	-0.45192	0.23587	0.98404	-0.023205	0.7197	0.75066	-0.41377	0.24745		0.0293948
TG 64:13	0.83002	-0.26878	0.67297	0.86438	-0.21027	0.90483	0.924	-0.11403	0.9397		0.0258404
TG 64:14	0.44159	-1.1792	0.11394	0.7787	-0.36087	0.40018	1.0184	0.026336	0.67747		0.0173276
TG 64:16	0.78932	-0.34131	0.60584	0.8162	-0.29301	0.40018	1.5676	0.64858	0.075256		0.0582994
TG 64:2	0.55711	-0.84397	0.13879	1.1515	0.20352	0.44697	0.8038	-0.3151	0.59656		0.0186699
TG 64:3	0.56791	-0.81628	0.092719	0.95969	-0.059365	0.84211	0.84432	-0.24413	0.49613		0.0226105
TG 64:4	0.49347	-1.019	0.11394	1.1914	0.25266	0.66072	0.76021	-0.39554	0.48125		0.0192123
TG 66:2	0.52655	-0.92535	0.092719	1.1774	0.23559	0.54896	1.0136	0.019468	1		0.0314432
TG 66:4	0.69651	-0.52178	0.60584	1.0936	0.12914	0.90483	0.87466	-0.19321	0.70535		0.0256491
TG 66:5	0.47242	-1.0819	0.16717	1.1303	0.17673	0.4967	0.80746	-0.30853	0.79594		0.0167417
TG 67:4	0.36184	-1.4666	0.092719	0.87968	-0.18494	0.78019	0.82668	-0.27459	0.65002		0.0402902
TG 68:1	0.5676	-0.81705	0.13879	0.92563	-0.1115	0.78019	1.1707	0.22737	0.57874		0.283996
TG 68:2	0.48858	-1.0333	0.13879	1.1396	0.1885	0.54896	1.0857	0.11859	0.93972		0.0143827
TG 68:3	0.51946	-0.94491	0.13879	1.0411	0.058114	0.60378	1.0446	0.062963	0.87978		0.0317799
TG 68:4	0.52227	-0.93714	0.19959	1.0412	0.05829	0.7197	0.98511	-0.021648	0.93972		0.0260313
TG 68:5	0.48646	-1.0396	0.32127	1.0958	0.13195	0.4967	0.96001	-0.058878	0.93972		0.0602634
TG 68:6	0.53947	-0.89038	0.23587	1.4235	0.50943	0.40018	0.80816	-0.30729	0.49613		0.020425
TG 70:2	0.50744	-0.97868	0.074455	1.168	0.224	0.60378	1.091	0.1256	0.85343		0.0218771
TG 70:3	0.5267	-0.92495	0.046401	1.2232	0.29069	0.31538	1.0202	0.028799	1		0.0158073
TG 70:4	0.51959	-0.94456	0.059235	0.96494	-0.051494	0.54896	0.89969	-0.1525	0.43587		0.0278346
TG 70:5	0.39454	-1.3418	0.046401	1.0297	0.042259	0.4967	0.9558	-0.065215	0.87978		0.0260103
TG 70:6	0.49123	-1.0255	0.32127	1.0537	0.075503	0.66072	0.92556	-0.11161	0.76228		0.0290889
TG 72:5	0.48323	-1.0492	0.046401	1.4267	0.51264	0.24281	1.0311	0.044187	0.59656		0.0524297
TG O-18:0_16:0_18:2	0.28519	-1.81	0.074455	1.3459	0.42854	0.078893	0.62422	-0.67986	0.24745		0.0612349
TG O-22:0_18:0_18:1	0.43876	-1.1885	0.059235	0.96835	-0.046398	0.96824	0.90506	-0.14391	1		0.0181156
TG O-22:1_18:1_18:2	0.74872	-0.4175	0.37038	1.3596	0.44323	0.27751	0.64608	-0.63021	0.24745		0.0204084
TG O-46:0	0.18376	-2.4441	0.0055121	1.0408	0.057659	0.84211	0.60802	-0.71781	0.10512		0.0189788
TG O-48:0	0.19497	-2.3587	0.007898	0.90585	-0.14265	0.7197	0.68816	-0.53919	0.315		0.0150985
TG O-48:1	0.22533	-2.1499	0.02065	1.0031	0.004489	0.7197	0.64615	-0.63006	0.14314		0.0131714
TG O-50:0	0.25926	-1.9475	0.011107	1.0101	0.014541	0.54896	0.76716	-0.3824	0.43587		0.0270228
TG O-50:1	0.25102	-1.9941	0.027396	0.99483	-0.0074808	0.7197	0.64317	-0.63673	0.16181		0.133245
TG O-50:2	1.1632	0.21805	0.74299	1.1227	0.167	0.31538	0.7405	-0.43342	0.44952		0.109756
TG O-52:0	0.35106	-1.5102	0.035952	0.9702	-0.043641	1	0.89968	-0.15251	0.97051		0.0250378
TG O-54:1	0.30844	-1.697	0.0055121	1.0254	0.036248	0.60378	0.68982	-0.5357	0.48125		0.0265587
TG O-54:2	0.34215	-1.5473	0.046401	1.1317	0.1785	0.44697	0.69942	-0.51576	0.315		0.019017
TG O-56:1	0.65368	-0.61334	0.96257	1.1131	0.1546	0.60378	0.81478	-0.29552	0.68421		0.0177132
TG O-56:2	0.43972	-1.1853	0.074455	1.0574	0.080534	0.4967	0.7066	-0.50104	0.4055		0.0196891
TG O-56:4	0.42447	-1.2363	0.035952	1.2383	0.30832	0.1564	0.7062	-0.50185	0.28974		0.100878
TG O-58:3	0.49762	-1.0069	0.27659	1.1442	0.19431	0.4967	0.6472	-0.62771	0.27286		0.0295766
TG O-60:2	0.47791	-1.0652	0.11394	1.0732	0.10189	0.96824	0.821	-0.28454	0.9118		0.0233958

## Sheet: Supplementary File 4
	Quality control
Metabolite	CV%
1-Methylhistidine	0.0150703
3-(4-Hydroxyphenyl)lactate	0.060018
3-Hydroxy-3-methylglutarate	0.0249667
3-Methylhistidine	0.00980969
7-Methylguanine	0.0229988
Adenosinemonophosphate	0.0612432
Alanine	0.0122982
Allantoin	0.0105046
Amino(iso)butyric acid	0.0300514
Aminoadipate	0.0118791
Anserine	0.0249451
Arginine	0.00845598
Asparagine	0.0124818
Aspartate	0.0233882
C6H12O6	0.00604774
C6H12O7 sugar acid	0.198018
Carnosine	0.0168827
Citrulline	0.0297832
Creatine	0.0224537
Creatinine	0.0143001
Cysteine-S-sulfate	0.0115956
Decanoylcarnitine	0.0245159
Deoxycarnitine	0.0188021
Dimethylarginine	0.0426718
Equol	0.0249496
Ferulate	0.0196436
Glutamine	0.0116438
Glutamyl-glutamine	0.00686215
Glutamylleucine	0.0151381
Glycerolphosphate	0.0388125
Glycerophosphocholine	0.0887064
Glycine	0.0126254
Glycitein	0.0204015
Glycolate	0.0144289
Histamine	0.0104987
Histidine	0.0135849
Hydroxybutanoate	0.0419107
Hydroxyglutaric acid	0.0345834
Hydroxyhexadecanoic acid	0.0407909
Hydroxyhippuric acid	0.0243874
Hydroxyproline	0.0302393
Indolelactic acid	0.0420722
Indoxyl sulfate	0.0120739
Isoleucine	0.0293963
Ketamine	0.0166149
Kynurenic acid	0.0255659
Kynurenine	0.0169204
Lactate	0.02322
Lauroylcarnitine	0.0354669
Leucine	0.0118481
Lysine	0.0244327
Malate	0.178404
Maleamic acid	0.273943
Methionine sulfoxide	0.0157439
N1-Acetylspermidine	0.0581118
N8-Acetylspermidine	0.0489817
N-Acetylaspartic acid	0.0231923
N-Acetylglutamic acid	0.0200376
N-Acetylserine	0.024497
N-Acetyltyrosine	0.0262321
Nicotinamide 1-oxide	0.0296425
Octanoylcarnitine	0.025801
Ornithine	0.0181768
Oxoadipate	0.0262226
Oxoglutaric acid	0.00989921
Palmitoylcarnitine	0.0344566
Pantothenic acid	0.0214268
Phenylalanine	0.0113102
Phosphocholine	0.0266411
Proline	0.0136564
Prolylleucine	0.0228017
Pseudouridine	0.0107236
Pyruvate	0.0281155
Serine	0.0113067
Sphingosine (d18:1)	0.0357209
Sphingosine-1-phosphate	0.0732264
Succinate	0.041412
Taurine	0.0168998
Thiamine	0.0184439
Threonine	0.0157589
Thymidine	0.0434298
Trimethyllysine	0.0275227
Tryptophan	0.0208587
Tyrosine	0.0225408
Uracil	0.0162413
Urate	0.00675121
Urea	0.0195608
Ureidopropionic acid	0.0346024
Uridine	0.0345369
Urocanate	0.0168917
Valine	0.00968353
