# Supplementary material for: Diet modulates the therapeutic effects of dimethyl fumarate mediated by the immunometabolic neutrophil receptor HCAR2
Source: eLife. 2025 Apr 23;14:e98970. doi: 10.7554/eLife.98970 (PMC12113270; doi:10.7554/eLife.98970)
Supplement: Supplementary file 2. [file elife-98970-supp2.xlsx]

## Sheet: Supplementary File 2
LA diet vs. HFb diet
Lipid species	Fold change (FC)	log2(FC)	p-value (FDR adjusted)
LPC 10:0	23.184	4.5351	2.5886e-05		Abbreviation	Lipid class
CAR 12:0	22.629	4.5001	2.6255e-06		CAR	Acylcarnitines
LPC 12:0	118.54	6.8893	2.3967e-05		CE	Cholesterylester
CAR 14:0	5.6918	2.5089	8.2304e-06		Cer	Ceramides
CE 14:0	29.031	4.8595	6.2441e-10		CL	Cardiolipin
LPC 14:0	10.404	3.3791	1.4993e-07		CoQ	Coenzym Q
CAR 16:0	1.2257	0.29356	0.13464		DLCL	Dilysocardiolipin
LPC O-16:0	1.6622	0.73312	0.0083138		FA	(Free) Fatty acid
LPE 16:0	1.4209	0.50676	0.069923		HexCer	Hexosylceramide/Cerebroside
CE 17:0	1.1318	0.17862	0.17232		LNAPE	N-acyl lysophosphatidylethanolamine
LPC 17:0	0.98138	-0.02711	0.89575		LPC	Lysophosphatidylcholine
LPE 17:0	0.78686	-0.34581	0.38255		LPC O	Ether-linked lysophosphatidylcholine/plasmalogen LPC
CAR 18:0	1.08	0.11107	0.50426		LPE	Lysophosphatidylethanolamine
LPC 18:0	1.439	0.52508	0.00055433		LPE O	Ether-linked lysophosphatidylethanolamine/plasmalogen LPE
LPC O-18:0	1.9623	0.97254	0.00028288		LPI	Lysophosphatidylinositol
LPE 18:0	1.3016	0.38032	0.022677		LPS	Lysophosphatidylserine
LPI 18:0	1.4236	0.50951	0.16818		PA	Phosphatidic acid
LPC O-19:0	1.4967	0.58182	0.0099355		PC	Phosphatidylcholine
CAR 20:0	2.1102	1.0774	0.0028371		PC O	Ether-linked phosphatidylcholine/Plasmalogen PC
FA 20:0	1.5463	0.62883	0.013195		PE	Phosphatidylethanolamine
LPC 20:0	2.0286	1.0205	0.001027		PE O	Ether-linked phosphatidylethanolamine/Plasmalogen PE
LPC O-20:0	2.1154	1.0809	0.00027522		PG	Phosphatidylglycerol
LPC 21:0	2.3191	1.2136	1.6743e-05		PI	Phosphatidylinositol
CAR 22:0	0.93087	-0.10335	0.57779		PS	Phosphatidylserine
LPC 22:0	1.561	0.64244	0.0026754		SE	Steryl ester
LPC O-22:0	1.9837	0.98822	0.00010687		SL	Sulfonolipid
PC 22:0	59.433	5.8932	7.817e-06		SM	Sphingomyelin
CAR 24:0	1.1423	0.19198	0.35238		ST	Cholesterol sulfate
LPC 24:0	1.9502	0.96363	5.9763e-05		TG	Triacylglyceride
PC 12:0_12:0	170.01	7.4095	1.2248e-06		TG O	Ether-linked triacylglyceride
PC 26:0	281.86	8.1388	1.6013e-05
PC O-26:0	22.657	4.5019	4.0943e-09		Lipid species are represented either as sum composition (carbons and double bonds), or if possible/unambiguous with the composition of acyl chains.
PC 27:0	76.357	6.2547	5.853e-06
LNAPE 28:0	33.315	5.0581	1.6367e-06
PC 28:0	68.729	6.1028	1.1061e-06
PC O-28:0	24.886	4.6373	1.1546e-10
PI 12:0_16:0	66.214	6.0491	4.749e-06
SM 28:0;2O	53.114	5.731	8.4195e-08
PC 29:0	19.355	4.2747	2.1314e-07
HexCer 18:0;3O/12:0;(2OH)	63.997	5.9999	1.7699e-07
PC 30:0	11.171	3.4817	4.1476e-08
PC O-30:0	6.0944	2.6075	2.0522e-08
PE 30:0	78.048	6.2863	1.1447e-06
PG 14:0_16:0	18.069	4.1754	4.2227e-05
PI 14:0_16:0	19.483	4.2842	6.4393e-06
SM 30:0;2O	31.065	4.9572	5.5662e-09
PC 31:0	1.2126	0.27814	0.037101
Cer 18:0;3O/14:0;(2OH)	41.25	5.3663	2.0951e-07
HexCer 18:0;3O/14:0;(2OH)	59.739	5.9006	4.4394e-09
LNAPE 32:0	10.776	3.4298	5.978e-08
PC 32:0	0.86569	-0.20807	0.23135
PC O-32:0	1.1171	0.15977	0.3457
PI 16:0_16:0	6.2782	2.6504	0.00036914
SM 32:0;2O	10.19	3.3492	4.4394e-09
TG 32:0	306.14	8.258	0.00035979
PC 33:0	1.1266	0.172	0.35238
Cer 18:0;2O/16:0	3.6105	1.8522	0.00018859
Cer 18:0;3O/16:0;(2OH)	4.2248	2.0789	7.6879e-07
Cer 18:0;3O/16:0	4.5019	2.1705	0.001277
HexCer 18:0;3O/16:0;(2OH)	4.392	2.1349	6.1753e-08
LNAPE 16:0/N-18:0	0.75822	-0.39931	0.0074371
PC 34:0	1.0379	0.053668	0.79854
PC O-34:0	1.2594	0.33275	0.037523
PE 34:0	1.2198	0.2866	0.18309
PE O-18:0_16:0	0.60298	-0.72983	0.0019743
SM 34:0;2O	1.4871	0.57254	0.0012191
TG 34:0	543.35	9.0857	6.8287e-05
TG 35:0	123.17	6.9445	0.00093283
LNAPE 36:0	1.1028	0.14121	0.40144
PC 36:0	1.2045	0.26849	0.28454
PC O-36:0	0.58903	-0.76358	0.0012061
TG 36:0	858.98	9.7465	2.7924e-05
LNAPE 18:0/N-20:0	1.0311	0.044183	0.82972
TG 37:0	161.35	7.334	8.7046e-05
Cer 18:0;3O/20:0	3.7962	1.9245	0.00012818
PC O-38:0	0.86013	-0.21737	0.34109
SM 38:0;2O	1.8511	0.88837	0.00021039
TG 38:0	756.61	9.5634	9.6951e-06
Cer 18:0;3O/21:0	3.8596	1.9484	0.00094718
PC 39:0	0.78844	-0.34292	0.31015
TG 39:0	237.38	7.8911	0.00047905
Cer 18:0;2O/22:0	2.5801	1.3674	0.016719
Cer 18:0;3O/22:0;(2OH)	2.4857	1.3137	1.317e-05
Cer 18:0;3O/22:0	1.9058	0.93041	0.0087659
HexCer 18:0;3O/22:0;(2OH)	2.6026	1.38	4.5018e-05
PC 40:0	1.2196	0.28638	0.20025
SM 40:0;2O	1.0568	0.079654	0.64941
SM 40:0;3O	0.67574	-0.56546	0.0031974
TG 40:0	379.65	8.5685	2.6103e-05
Cer 18:0;2O/23:0	12.437	3.6366	0.0012573
Cer 18:0;3O/23:0;(2OH)	5.4551	2.4476	8.0605e-08
HexCer 18:0;3O/23:0;(2OH)	4.6479	2.2166	1.3309e-08
SM 41:0;2O	1.9924	0.99451	0.0071894
SM 41:0;3O	1.3248	0.40576	0.022677
TG 41:0	44.961	5.4906	0.0095675
Cer 18:0;2O/24:0	5.3714	2.4253	0.0064943
Cer 18:0;3O/24:0;(2OH)	3.4535	1.7881	3.9454e-07
Cer 18:0;3O/24:0	3.4516	1.7873	0.0024385
HexCer 18:0;3O/24:0;(2OH)	3.1614	1.6606	1.1447e-06
SM 42:0;2O	1.1971	0.2596	0.30917
SM 42:0;3O	0.83218	-0.26503	0.23252
TG 42:0	168.35	7.3954	1.2464e-05
Cer 18:0;2O/25:0	8.5174	3.0904	0.0058785
Cer 18:0;3O/25:0	3.8327	1.9384	0.0051273
TG 43:0	40.517	5.3405	0.00041163
Cer 20:0;3O/24:0	2.2869	1.1934	0.0075454
TG 44:0	71.516	6.1602	7.3696e-06
TG 46:0	31.951	4.9978	1.5863e-05
TG O-46:0	102.54	6.6801	0.022747
TG 48:0	8.0329	3.0059	0.00014021
TG O-48:0	39.341	5.2979	0.02413
TG 50:0	4.6504	2.2173	0.0017843
TG O-50:0	11.228	3.489	0.020443
TG 52:0	3.1259	1.6443	0.0075649
TG O-52:0	4.3517	2.1216	0.02413
TG 54:0	1.9941	0.99576	0.022621
CAR 14:1	1.9913	0.99368	0.013159
LPC 14:1	13.551	3.7603	4.5775e-06
CAR 16:1	1.5981	0.67632	0.076722
LPC 16:1	4.4303	2.1474	1.123e-05
LPC O-16:1	0.94584	-0.080328	0.72739
LPE O-16:1	1.2738	0.34909	0.087346
LPC 17:1	5.0746	2.3433	2.8367e-06
CAR 18:1	0.7781	-0.36196	0.37213
FA 18:1	1.7927	0.84217	0.022203
LPC 18:1	1.6896	0.75671	0.001701
LPC O-18:1	1.4067	0.49232	0.078703
LPE 18:1	2.0363	1.026	0.00012042
LPE O-18:1	1.1424	0.19212	0.37213
LPI 18:1	7.8602	2.9746	1.2248e-06
LPC 19:1	2.6685	1.416	0.00015
CE 20:1	2.3429	1.2283	9.4646e-05
LPC 21:1	6.0847	2.6052	8.4904e-06
LPC 22:1	2.4015	1.2639	1.9029e-05
LPC O-22:1	2.3846	1.2538	0.00092011
CAR 24:1	2.2297	1.1569	2.535e-06
LPC 24:1	2.1261	1.0882	0.00082754
LPC O-24:1	1.8963	0.92318	0.00012854
PC O-25:1	1.3135	0.39346	0.019858
LPC 26:1	2.5091	1.3271	2.7004e-06
PC 26:1	53.401	5.7388	1.2444e-07
ST 27:1;O;S	1.454	0.53999	8.7046e-05
PC 28:1	80.697	6.3344	5.2501e-07
SM 28:1;2O	16.506	4.0449	2.2188e-07
ST 28:1;O;S	0.30469	-1.7146	6.0062e-08
PC 29:1	42.422	5.4068	8.747e-07
SM 29:1;2O	11.859	3.5679	2.8161e-08
ST 29:1;O;S	0.40968	-1.2874	4.1583e-05
PC 30:1	32.066	5.003	2.1314e-07
PE 30:1	9.8499	3.3001	3.3718e-06
PI 16:0_14:1	36.425	5.1869	8.851e-06
SM 30:1;2O	18.363	4.1987	2.1703e-08
PC 31:1	13.404	3.7446	4.5837e-09
SM 31:1;2O	5.5018	2.4599	2.7105e-08
Cer 18:1;2O/14:0	28.869	4.8514	2.56e-06
HexCer 18:1;2O/14:0	15.545	3.9584	4.0907e-10
PC 32:1	13.294	3.7327	4.0943e-09
PC O-32:1	2.1008	1.0709	1.8907e-05
PE 32:1	29.376	4.8766	0.00077392
PG 14:0_18:1	5.1324	2.3596	8.6263e-05
PI 32:1	33.641	5.0722	3.3318e-06
SM 32:1;2O	4.7516	2.2484	7.4367e-08
SM 32:1;3O	2.9134	1.5427	6.1909e-06
PC 33:1	5.5138	2.463	2.8364e-09
SL 17:0;O/16:1	6.4479	2.6888	0.0016351
SL 17:0;O/16:1;O	11.433	3.5151	0.00023117
SM 33:1;2O	1.1698	0.2262	0.070371
SM 33:1;3O	0.71852	-0.47691	0.035804
Cer 18:1;2O/16:0	2.3839	1.2533	0.00043597
HexCer 18:1;2O/16:0	3.0228	1.5959	0.00018887
LNAPE 16:1/N-18:0	10.262	3.3593	1.1546e-10
PC 34:1	2.6229	1.3911	1.1289e-09
PC O-34:1	1.0648	0.09058	0.63775
PE 34:1	4.2451	2.0858	2.8367e-06
PE O-18:1_16:0	0.95489	-0.066591	0.78007
PI 34:1	14.485	3.8565	1.6013e-05
SM 34:1;2O	1.1548	0.20763	0.086265
SM 34:1;3O	1.4423	0.52834	0.0052535
PC 35:1	4.2608	2.0911	4.9048e-09
PC O-35:1	1.5594	0.64096	0.014259
SM 35:1;2O	0.86876	-0.20298	0.17077
LNAPE 18:1/N-18:0	3.0887	1.627	3.4568e-08
PC 18:0_18:1	5.8497	2.5484	2.1292e-10
PC O-36:1	2.1809	1.1249	7.7176e-06
PE 18:0_18:1	1.6796	0.7481	0.0092224
PI 18:0_18:1	5.7984	2.5357	9.8466e-07
SM 36:1;2O	1.1125	0.15385	0.47577
PC 37:1	5.0902	2.3477	1.0254e-06
PC O-37:1	2.8497	1.5108	0.0030722
SM 37:1;2O	1.4017	0.48716	0.022698
Cer 18:1;2O/20:0	2.9799	1.5753	1.5357e-05
HexCer 18:1;2O/20:0	2.4805	1.3106	4.749e-06
LNAPE 18:1/N-20:0	5.4974	2.4588	4.0943e-09
PC 38:1	7.3543	2.8786	2.5243e-07
PC O-38:1	3.5989	1.8475	0.00063006
PE O-20:0_18:1	1.8679	0.90143	1.1313e-05
SM 38:1;2O	1.1787	0.23718	0.13168
TG 38:1	75.974	6.2474	1.9078e-05
LNAPE 18:1/N-21:0	4.8231	2.27	1.1077e-07
PC 39:1	7.4524	2.8977	6.2907e-07
SM 39:1;2O	1.1593	0.21321	0.17612
Cer 18:1;2O/22:0	1.3412	0.42355	0.19043
Cer 18:0;3O/22:1	6.5015	2.7008	7.2604e-07
HexCer 18:1;2O/22:0	1.9501	0.96351	0.0046127
LNAPE 20:1/N-20:0	7.5826	2.9227	6.8033e-08
PC 18:1_22:0	2.6098	1.3839	1.5266e-05
PC O-40:1	2.113	1.0793	7.6562e-05
SM 40:1;2O	0.94697	-0.078606	0.58612
HexCer 18:1;2O/23:0	4.5923	2.1992	1.317e-05
PC O-41:1	3.8247	1.9353	2.7956e-05
SM 41:1;2O	1.2047	0.2687	0.034858
TG 41:1	66.792	6.0616	0.00011773
Cer 18:0;2O/24:1	7.8514	2.973	0.0015119
Cer 18:1;2O/24:0	1.5679	0.64886	0.04002
Cer 18:0;3O/24:1;(2OH)	5.2859	2.4022	2.184e-07
HexCer 18:1;2O/24:0	1.8	0.84802	0.00026745
PC 24:0_18:1	2.4452	1.2899	2.9425e-05
SM 42:1;2O	0.94448	-0.082407	0.60981
SM 42:1;3O	1.7599	0.81551	5.8218e-05
TG 42:1	27.969	4.8057	1.2361e-06
SM 43:1;2O	1.5805	0.66039	0.055978
TG 43:1	21.421	4.4209	0.000766
SM 44:1;2O	2.1339	1.0935	1.7995e-05
TG 44:1	59.282	5.8895	3.4107e-05
TG 45:1	16.846	4.0743	0.0008291
TG 46:1	31.383	4.9719	4.4555e-05
TG 47:1	13.599	3.7655	0.00018219
TG 48:1	22.922	4.5187	3.5982e-05
TG O-48:1	49.875	5.6403	0.025619
TG 49:1	7.0786	2.8235	0.00028642
TG 50:1	0.79742	-0.32659	0.02733
TG O-50:1	10.023	3.3252	0.029677
TG 51:1	5.5804	2.4804	0.0014322
TG 16:0_17:0_18:1	5.5804	2.4804	0.0014322
TG 52:1	4.284	2.099	0.0016605
TG 53:1	3.2254	1.6895	0.005775
TG 54:1	2.2889	1.1947	0.030246
TG O-54:1	1.9132	0.936	0.15293
TG 55:1	2.1873	1.1291	0.033254
TG 56:1	1.0218	0.03109	0.94645
TG O-56:1	0.86494	-0.20932	0.73101
TG 57:1	1.7845	0.83553	0.047038
TG 58:1	1.2966	0.37475	0.41911
TG O-22:0_18:0_18:1	1.1856	0.24564	0.62951
TG 59:1	1.7877	0.83809	0.12612
TG 60:1	3.7324	1.9001	0.0060426
TG 61:1	3.2558	1.703	0.0054577
TG 64:1	7.7033	2.9455	0.0028805
TG 68:1	5.724	2.517	0.0029985
CAR 14:2	0.60179	-0.73267	0.0085993
CAR 16:2	0.48353	-1.0483	0.010293
LPC 17:2	4.2688	2.0938	9.8053e-06
FA 18:2	0.19425	-2.364	0.0017826
LPC 18:2	2.1485	1.1033	0.00055433
LPE 18:2	1.1732	0.23048	0.2459
LPI 18:2	0.93267	-0.10057	0.74147
LPC 20:2	3.7394	1.9028	0.00019092
LNAPE 22:2	15.688	3.9715	1.3992e-06
LPC 22:2	2.551	1.3511	0.00435
LPC O-24:2	0.36025	-1.4729	2.1772e-06
LPC 26:2	1.942	0.95757	0.0015684
PC 28:2	10.634	3.4106	3.9289e-05
ST 28:2;O;S	0.11971	-3.0624	9.1379e-10
PC 30:2	9.7841	3.2904	1.8249e-06
SM 30:2;2O	17.849	4.1578	2.4823e-08
PC 32:2	4.8281	2.2715	6.6737e-07
PC O-32:2	1.226	0.29401	0.03577
PE 32:2	13.11	3.7126	3.5982e-05
PI 14:0_18:2	8.6345	3.1101	6.2907e-07
SM 32:2;2O	5.1087	2.3529	1.3293e-06
PC 33:2	1.1124	0.15372	0.41736
LNAPE 34:2	5.0298	2.3305	2.139e-06
PC 34:2	1.1651	0.22048	0.066155
PC O-34:2	0.41467	-1.27	5.2778e-05
PE 34:2	1.2818	0.35812	0.11415
PE 16:1_18:1	13.932	3.8004	7.5462e-07
PE O-16:0_18:2	0.26398	-1.9215	0.00011492
PE O-16:1_18:1	1.8216	0.86524	2.7813e-05
PG 16:0_18:2	1.0767	0.10659	0.7238
PG 16:0_18:2.1	0.59476	-0.74963	0.0030765
PI 16:1_18:1	1.0399	0.056485	0.81413
SM 34:2;2O	1.25	0.32188	0.041852
SM 34:2;3O	1.4518	0.53787	0.0065812
PC 17:0_18:2	1.2422	0.31285	0.17141
PC O-35:2	0.33925	-1.5596	0.00013683
PE 17:0_18:2	0.58496	-0.77358	0.043895
SM 35:2;2O	0.98186	-0.026415	0.85826
PC 18:0_18:2	1.199	0.2618	0.0074072
PC 18:1_18:1	4.7435	2.2459	3.5825e-08
PC O-18:0_18:2	0.50295	-0.99151	9.8876e-05
PC O-18:1_18:1	1.5076	0.59222	0.015596
PE 18:0_18:2	1.0354	0.050168	0.84838
PE 18:1_18:1	1.2085	0.2732	0.15565
PG 18:0_18:2	0.60341	-0.72878	0.0046741
PG 18:1_18:1	3.2981	1.7216	0.0028296
PI 18:0_18:2	0.60108	-0.73437	0.012021
PI 18:1_18:1	6.5859	2.7194	4.0579e-08
PS 36:2	0.64998	-0.62152	0.26171
SM 36:2;2O	1.1923	0.25375	0.23597
PC 37:2	1.1794	0.23805	0.29676
PE O-19:0_18:2	0.35707	-1.4857	1.7014e-06
LNAPE 18:1/N-20:1	4.2798	2.0975	2.1703e-08
LNAPE 18:2/N-20:0	0.92558	-0.11157	0.24729
PC 38:2	6.3066	2.6569	4.7198e-06
PC O-38:2	0.69876	-0.51713	0.019858
PE O-20:1_18:1	2.7785	1.4743	3.0996e-05
PI 18:0_20:2	57.528	5.8462	9.6406e-07
LNAPE 18:2/N-21:0	1.1823	0.2416	0.30171
PC 39:2	3.3688	1.7522	1.7699e-07
Cer 18:2;2O/22:0	0.96187	-0.056082	0.82812
HexCer 18:1;2O/22:1	5.844	2.5469	4.0943e-09
LNAPE 20:2/N-20:0	5.3916	2.4307	4.2231e-05
PC 18:2_22:0	0.89962	-0.15262	0.46404
PC O-18:1_22:1	1.9642	0.97397	0.02413
PC O-18:2_22:0	1.0201	0.028727	0.91682
SM 40:2;2O	3.3359	1.7381	2.7105e-08
SM 40:2;2O.1	0.61907	-0.69182	0.00027522
TG 40:2	8.0507	3.0091	0.000766
PC 41:2	1.3809	0.46559	0.028761
SM 41:2;2O	1.1538	0.20634	0.16628
SM 41:2;2O.1	1.6269	0.70216	0.00056857
TG 41:2	7.2003	2.8481	0.000766
Cer 18:1;2O/24:1	4.3092	2.1074	0.00019468
HexCer 18:1;2O/24:1	3.6864	1.8822	1.8716e-06
PC 18:2_24:0	1.1299	0.17622	0.39029
PC 42:2	3.4466	1.7852	5.1564e-07
SM 42:2;2O	1.7677	0.82184	0.00012336
TG 42:2	11.478	3.5208	0.00022555
SM 43:2;2O	1.9956	0.99685	4.9746e-05
TG 43:2	5.7522	2.5241	0.0028024
SM 44:2;2O	2.9497	1.5606	5.2501e-07
TG 44:2	5.7937	2.5345	0.00063735
TG 45:2	3.4813	1.7996	0.0043328
SE 28:1/18:1	0.4633	-1.11	3.5982e-05
TG 47:2	4.782	2.2576	0.0030028
TG 50:2	4.7864	2.259	5.269e-07
TG O-50:2	1.8879	0.91679	0.11947
TG 51:2	4.4312	2.1477	0.00032188
TG 53:2	4.697	2.2317	0.00040732
TG O-18:0_16:0_18:2	0.54078	-0.88689	0.15674
TG 54:2	3.1696	1.6643	0.00048113
TG O-54:2	0.63309	-0.65952	0.25002
TG 55:2	1.8672	0.90084	0.033785
TG 56:2	2.1001	1.0705	0.030776
TG O-56:2	0.71692	-0.48011	0.41052
TG 57:2	0.92987	-0.10489	0.82972
TG 58:2	0.53815	-0.89393	0.11756
TG 59:2	0.72296	-0.46802	0.29613
TG 60:2	0.59292	-0.75409	0.14356
TG O-60:2	0.63255	-0.66074	0.21611
TG 61:2	1.4225	0.50845	0.27604
TG 62:2	2.7509	1.4599	0.0093214
TG 64:2	4.6915	2.2301	0.0032685
TG 66:2	7.9444	2.9899	0.0013865
TG 68:2	7.0196	2.8114	0.0020948
TG 70:2	6.3992	2.6779	0.0008291
CE 18:3	2.6127	1.3856	4.5777e-05
LPC 18:3	1.9459	0.96047	0.00029776
LPC 20:3	6.1552	2.6218	4.2675e-07
LPI 20:3	14.665	3.8743	1.7758e-05
LPC 22:3	8.3078	3.0545	8.6263e-05
CE 24:3	6.3024	2.6559	0.00011483
LPC 24:3	9.7244	3.2816	0.00050747
PC 32:3	7.4767	2.9024	5.9198e-05
PC O-32:3	0.58389	-0.77622	0.025059
PC 33:3	1.4984	0.58342	0.03676
PC 34:3	1.0569	0.079772	0.55299
PC 16:0_18:3	1.7257	0.78718	0.00012336
PC O-34:3	0.25188	-1.9892	3.0776e-05
PE O-16:1_18:2	0.40932	-1.2887	6.0617e-05
PC 17:1_18:2	0.81945	-0.28728	0.13509
DLCL 18:1_18:2	1.2455	0.31668	0.087928
PC 16:0_20:3	18.15	4.1819	8.4858e-05
PC 18:1_18:2	0.95692	-0.063533	0.61612
PC O-16:0_20:3	6.4971	2.6998	2.7835e-06
PC O-18:1_18:2	0.43728	-1.1934	0.00029404
PE 18:1_18:2	0.5954	-0.74806	0.0026989
PE O-18:1_18:2	0.44274	-1.1755	2.7835e-06
PE O-18:2_18:1	2.3694	1.2445	4.3584e-06
PG 18:1_18:2	0.51251	-0.96434	0.0097963
PI 16:0_20:3	80.93	6.3386	6.2907e-07
PI 18:1_18:2	0.29008	-1.7855	1.458e-05
SM 36:3;2O	0.53169	-0.91134	0.00045118
PC 38:3	3.3513	1.7447	3.8733e-09
PC O-16:0_22:3	3.0302	1.5994	1.1117e-05
PC O-18:0_20:3	6.4699	2.6937	3.4865e-06
PI 18:0_20:3	61.306	5.938	2.139e-06
PC 39:3	4.5137	2.1743	9.9335e-08
PC O-39:3	6.1889	2.6297	1.5357e-05
PC 18:0_22:3	7.8217	2.9675	3.7414e-08
PC 18:2_22:1	1.9392	0.95549	0.00063735
PC 20:0_20:3	16.694	4.0613	2.1141e-08
TG 40:3	23.667	4.5648	0.000259
SM 41:3;2O	0.48324	-1.0492	0.00013683
Cer 18:2;2O/24:1	1.282	0.35839	0.074934
HexCer 18:1;2O/24:2	4.5355	2.1813	1.317e-05
PC 42:3	1.8478	0.88579	0.00035203
PC O-42:3	0.89141	-0.16583	0.4914
SM 42:3;2O	0.74206	-0.43039	0.019648
SM 42:3;3O	0.89938	-0.153	0.52498
SM 43:3;2O	2.4559	1.2963	0.087595
SM 44:3;2O	1.7256	0.78708	0.0029163
TG 44:3	16.429	4.0382	5.3626e-05
TG 46:3	1.9072	0.93145	0.063498
SE 29:1/18:2	0.47103	-1.0861	4.624e-06
TG 47:3	1.532	0.6154	0.13168
TG 49:3	2.1967	1.1353	0.023422
TG 50:3	2.5683	1.3608	0.00058133
TG 51:3	1.0874	0.12086	0.72959
TG 53:3	1.577	0.65721	0.045051
TG 54:3	1.0916	0.12645	0.49712
TG 55:3	2.7307	1.4493	0.00035361
TG 56:3	3.1022	1.6333	7.305e-05
TG 57:3	0.68558	-0.54461	0.20156
TG 58:3	0.40815	-1.2928	0.013169
TG O-58:3	0.34239	-1.5463	0.032551
TG 18:1_18:2_23:0	0.33005	-1.5992	0.0095675
TG 60:3	0.12674	-2.98	0.001032
TG 61:3	0.3946	-1.3415	0.041236
TG 62:3	0.71076	-0.49257	0.35036
TG 64:3	1.683	0.75105	0.11558
TG 68:3	2.7863	1.4783	0.0097215
TG 70:3	3.2485	1.6998	0.0017191
FA 20:4	0.85422	-0.22732	0.61589
LPE 20:4	1.7527	0.80956	0.0017027
LPC 22:4	0.57295	-0.80353	0.00063735
CE 24:4	0.069829	-3.84	8.0605e-08
LPC 24:4	0.63807	-0.64822	0.033347
PC 32:4	20.177	4.3346	8.5796e-07
PC 34:4	4.2108	2.0741	7.2075e-06
PC O-34:4	1.889	0.91759	0.00077915
PE 14:0_20:4	19.31	4.2712	3.7526e-08
PI 14:0_20:4	13.99	3.8063	2.8367e-06
PC 35:4	0.76448	-0.38745	0.076659
DLCL 18:2_18:2	0.28544	-1.8087	9.4404e-05
PC 16:0_20:4	0.8037	-0.31527	0.13168
PC 18:2_18:2	0.75083	-0.41345	0.016617
PC O-36:4	0.73485	-0.44448	0.017662
PE 16:0_20:4	1.5241	0.60793	0.0048419
PE O-16:1_20:3	11.555	3.5305	5.269e-07
PE O-18:2_18:2	0.80458	-0.31369	0.013246
PG 18:2_18:2	0.21967	-2.1866	1.7195e-05
PI 16:0_20:4	1.2071	0.2716	0.20455
PI 18:2_18:2	0.13432	-2.8963	5.1204e-07
PC 17:0_20:4	0.73464	-0.4449	0.018736
PC 37:4	0.36767	-1.4435	4.876e-07
PI 17:0_20:4	0.58135	-0.78252	0.0007733
PC 16:0_22:4	1.9299	0.94851	0.00021913
PC 18:0_20:4	0.64046	-0.64283	0.0064943
PC 18:1_20:3	1.5476	0.63006	0.062049
PC O-38:4	0.90575	-0.14282	0.48479
PC O-18:0_20:4	1.1339	0.18124	0.61222
PE 38:4	1.0367	0.052022	0.73457
PE O-38:4	0.3367	-1.5705	8.0605e-08
PI 18:0_20:4	0.78689	-0.34577	0.055784
PI 18:1_20:3	27.942	4.8043	3.7514e-06
PS 38:4	0.65517	-0.61006	0.2156
PC 19:0_20:4	0.69669	-0.52141	0.082799
PC 18:0_22:4	0.89795	-0.15529	0.51404
PC 20:0_20:4	0.76555	-0.38542	0.021675
PC O-18:0_22:4	0.84714	-0.23933	0.32044
PC O-20:0_20:4	0.71355	-0.48691	0.01022
PE 40:4	0.20632	-2.277	2.126e-07
PE O-18:0_22:4	0.41508	-1.2685	1.1679e-05
LNAPE 22:4/N-20:0	0.70063	-0.51327	0.017532
PC 18:0_24:4	0.6767	-0.56342	0.078503
PC 22:0_20:4	0.68698	-0.54167	0.019858
PC O-22:0_20:4	0.45252	-1.1439	6.3089e-06
PC 24:0_20:4	0.79302	-0.33456	0.16123
PC O-44:4	0.47918	-1.0614	0.00050532
SE 28:1/20:3	1.1475	0.19856	0.42631
TG 51:4	0.41213	-1.2788	0.0019243
TG 53:4	0.61756	-0.69534	0.050484
TG 54:4	0.52531	-0.92875	0.0021938
Cer 21:0;2O/16:3;(3OH)(FA 18:1)	1.3413	0.42367	0.18472
TG 55:4	1.1364	0.18448	0.45433
TG O-56:4	0.12365	-3.0157	0.00034995
TG 57:4	0.87857	-0.18677	0.66301
TG 58:4	0.86802	-0.2042	0.59285
TG O-22:1_18:1_18:2	0.12699	-2.9773	0.0011838
TG 18:2_18:2_23:0	0.14963	-2.7405	0.001096
TG 60:4	0.18314	-2.449	0.0013562
TG 62:4	0.27853	-1.8441	0.0078543
TG 64:4	0.69285	-0.52938	0.3457
TG 66:4	0.50135	-0.99611	0.093726
TG 67:4	0.30475	-1.7143	0.0538
TG 68:4	0.59248	-0.75515	0.1704
TG 70:4	0.6163	-0.6983	0.098498
CE 20:5	5.72	2.516	2.7835e-06
LPC 22:5	1.0587	0.082309	0.72739
LPE 22:5	1.1273	0.17285	0.61947
CE 24:5	0.14979	-2.739	3.1966e-07
LPC 24:5	0.75343	-0.40845	0.2497
PC 34:5	3.342	1.7407	5.8366e-05
PC O-34:5	0.32896	-1.604	0.00021039
PC O-36:5	0.21377	-2.2259	1.0932e-05
PC O-18:1_20:4	0.70681	-0.50061	0.020418
PE 36:5	1.3795	0.46411	0.02811
PE O-16:1_20:4	0.40769	-1.2945	4.1983e-05
PE O-18:3_18:2	0.19029	-2.3937	2.7835e-06
PC 17:1_20:4	0.74122	-0.43203	0.041718
PC 16:0_22:5	0.68026	-0.55584	0.00023062
PC 38:5	0.95133	-0.071987	0.61222
PC O-16:0_22:5	0.75491	-0.40561	0.029677
PE 16:0_22:5	0.75692	-0.4018	0.034858
PE 18:1_20:4	1.0808	0.1121	0.35844
PE O-18:1_20:4	0.38413	-1.3803	1.0254e-06
PG 18:1_20:4	0.70044	-0.51367	0.12612
PI 18:0_22:5	3.3782	1.7563	8.229e-05
PI 18:1_20:4	0.69946	-0.51569	0.050129
PC 19:1_20:4	0.31251	-1.678	0.00010042
PC 39:5	1.2141	0.27987	0.27373
LNAPE 22:5/N-18:0	0.67756	-0.56158	0.019858
PC 40:5	0.93078	-0.10349	0.55408
PE 40:5	0.86112	-0.21571	0.23911
PE O-18:1_22:4	0.78428	-0.35056	0.066155
PE O-20:1_20:4	0.31738	-1.6557	9.9335e-08
PC 41:5	0.52533	-0.9287	0.0026423
LNAPE 42:5	0.80628	-0.31065	0.10094
PC O-20:0_22:5	0.93983	-0.089535	0.61754
PC O-22:1_20:4	0.97417	-0.037755	0.83817
SM 42:5;2O	0.059123	-4.0801	3.5007e-05
PC 20:4_24:1	1.3229	0.40367	0.028526
PC O-20:4_24:1	1.0011	0.0015176	0.99552
SM 44:5;2O	0.087602	-3.5129	3.1126e-06
TG 46:5	24.905	4.6384	7.6562e-05
TG 47:5	19.862	4.3119	0.0014649
SE 28:1/20:4	0.079046	-3.6612	7.5198e-11
SE 29:1/20:4	0.20254	-2.3037	4.749e-06
TG 50:5	1.0346	0.049025	0.91522
TG 51:5	0.5951	-0.74878	0.12211
TG 52:5	0.46757	-1.0967	0.0040336
TG 17:1_18:2_18:2	0.63784	-0.64872	0.059582
TG 53:5	0.60128	-0.73388	0.035876
TG 54:5	1.0429	0.060562	0.83817
TG 55:5	1.3439	0.42643	0.052273
TG 56:5	1.2468	0.31827	0.086207
TG 58:5	2.0372	1.0266	0.00035729
TG 59:5	1.0935	0.12897	0.76518
TG 60:5	1.3973	0.4826	0.18401
TG 66:5	0.42519	-1.2338	0.088724
TG 68:5	0.23889	-2.0656	0.019907
TG 70:5	0.29837	-1.7448	0.009936
TG 72:5	0.94187	-0.086399	0.83817
FA 22:6	2.5832	1.3692	0.0053771
LPC 22:6	1.9762	0.98273	0.00011373
LPE 22:6	2.5356	1.3423	0.00010202
LPI 22:6	4.7938	2.2612	0.00018219
PC 34:6	18.866	4.2378	6.2907e-07
PC O-36:6	8.1134	3.0203	1.0628e-07
PC 37:6	1.0413	0.058395	0.83564
PC 16:0_22:6	1.02	0.028558	0.85842
PC 18:2_20:4	0.49859	-1.0041	2.6791e-05
PC O-16:0_22:6	1.2316	0.30057	0.18289
PC O-16:1_22:5	0.26135	-1.9359	2.4632e-05
PC O-18:2_20:4	0.11911	-3.0696	3.053e-07
PE 38:6	1.5541	0.63606	0.0035418
PE O-16:1_22:5	0.72718	-0.45962	0.026296
PG 18:2_20:4	0.20326	-2.2986	7.2944e-06
PI 16:0_22:6	1.5534	0.63539	0.0078593
PI 18:0_22:6	4.3991	2.1372	0.00034761
PI 18:2_20:4	0.23773	-2.0726	0.00013523
PS 38:6	19.478	4.2838	2.4206e-06
PC 17:0_22:6	0.7202	-0.47353	0.040181
LNAPE 40:6	0.86862	-0.2032	0.44006
PC 18:0_22:6	1.2803	0.35644	0.062626
PC 18:1_22:5	1.0908	0.12533	0.48351
PC 20:2_20:4	0.36781	-1.443	4.2005e-05
PC O-18:0_22:6	1.1551	0.20799	0.27616
PC O-18:1_22:5	0.69216	-0.53083	0.037523
PC O-20:2_20:4	0.24267	-2.0429	3.5849e-07
PE 40:6	2.4756	1.3078	0.00032869
PE O-18:1_22:5	0.40062	-1.3197	9.2353e-05
PC 41:6	1.7267	0.788	0.0023211
SM 41:6;2O	0.12252	-3.0289	2.6273e-08
LNAPE 42:6	1.0464	0.065475	0.77407
PC 20:0_22:6	1.8681	0.90156	0.0015456
PC 20:1_22:5	1.6818	0.75002	1.5029e-05
PC O-22:2_20:4	0.24584	-2.0242	3.2729e-05
PC O-42:6	1.386	0.47093	0.032013
PC O-44:6	1.4611	0.54709	0.0026423
SM 46:6;2O	0.47314	-1.0797	0.0002816
TG 46:6	92.047	6.5243	1.1271e-06
SE 28:2/20:4	0.10248	-3.2866	1.0253e-06
TG 48:6	83.662	6.3865	2.0498e-06
TG 12:0_16:0_22:6	7.0222	2.8119	0.0011624
TG 12:0_18:2_20:4	0.93829	-0.09189	0.85842
TG 52:6	0.27363	-1.8697	0.00039437
TG 52:6.1	0.1997	-2.3241	4.9532e-05
TG 14:0_16:0_22:6	4.321	2.1114	0.0011944
TG 16:0_18:2_20:4	0.28049	-1.834	4.7265e-05
TG 55:6	0.63734	-0.64988	0.028526
TG 57:6	1.1732	0.23046	0.34124
TG 58:6	0.77956	-0.35928	0.25256
TG 60:6	1.1556	0.20861	0.55408
TG 68:6	0.59782	-0.74222	0.15974
TG 70:6	0.70658	-0.50108	0.32801
PE O-16:1_22:6	0.72101	-0.47191	0.027009
PC 39:7	1.4254	0.51136	0.055978
PC 40:7	1.3055	0.38458	0.047068
PC O-40:7	1.0156	0.022336	0.91933
PE O-18:1_22:6	0.5401	-0.8887	0.0021843
PC 41:7	2.3832	1.2529	0.00012654
PC 20:1_22:6	1.8751	0.907	5.0525e-06
PC 20:2_22:5	0.4701	-1.089	0.00053008
PE O-20:1_22:6	0.50691	-0.98019	4.2363e-05
PC O-46:7	1.1976	0.26013	0.29292
SE 28:1/22:6	0.18756	-2.4146	3.8036e-05
TG 52:7	1.1882	0.24878	0.66624
TG 54:7	0.40048	-1.3202	0.025934
TG 16:0_18:1_22:6	0.79157	-0.33722	0.39193
TG 57:7	0.66583	-0.58677	0.071153
TG 58:7	0.49988	-1.0003	0.00050236
TG 59:7	0.87617	-0.19072	0.46905
TG 60:7	0.43789	-1.1914	0.0031974
PC 40:8	0.64478	-0.63313	0.0072024
PG 20:4_20:4	0.52123	-0.94	0.005686
PC 20:4_22:4	0.52589	-0.92717	0.001054
PC O-42:8	0.19564	-2.3537	1.8061e-05
PC 20:4_24:4	0.1414	-2.8222	3.2281e-05
PC O-44:8	0.19291	-2.374	0.00015947
PE O-22:2_22:6	1.007	0.010058	0.96819
TG 18:2_18:3_18:3	0.088308	-3.5013	0.090303
TG 54:8	0.51144	-0.96737	0.014232
TG 57:8	0.43857	-1.1891	0.002266
TG 58:8	0.36353	-1.4599	0.00015764
TG 60:8	0.32897	-1.604	0.00068961
TG 62:8	0.22933	-2.1245	0.00022555
PC 40:9	1.2272	0.29532	0.39557
PC O-40:9	0.29532	-1.7596	0.00020225
PC 20:4_22:5	1.0005	0.00074366	0.99657
PG 20:4_22:5	0.45686	-1.1302	0.012685
TG 56:9	0.071521	-3.8055	1.8907e-05
TG 57:9	0.42786	-1.2248	0.002266
TG 60:9	0.45916	-1.1229	0.00031277
TG 62:9	0.64539	-0.63176	0.045403
PC 20:4_22:6	1.1211	0.16487	0.45914
TG 56:10	0.31353	-1.6733	0.035876
TG 58:10	0.012007	-6.38	2.5631e-07
TG 60:10	0.12581	-2.9907	1.6928e-06
TG 62:10	0.13137	-2.9283	2.3336e-06
TG 64:10	0.16035	-2.6407	0.00020225
PC 22:5_22:6	3.0837	1.6247	1.2248e-06
TG 62:11	0.084013	-3.5733	4.3657e-05
TG 64:11	0.091829	-3.4449	7.6691e-05
PC 44:12	5.372	2.4255	6.2183e-05
TG 58:12	0.16981	-2.558	7.6562e-05
TG 64:12	0.074268	-3.7511	8.4858e-05
TG 62:13	0.036303	-4.7837	8.0486e-07
TG 64:13	0.022967	-5.4443	9.9296e-06
TG 62:14	0.040299	-4.6331	0.00035729
TG 64:14	0.12808	-2.9649	0.00079692
TG 64:16	6.2372	2.6409	0.0032322
CoQ8	1.5058	0.59051	0.019188
CoQ9	1.2033	0.26695	0.33206
CoQ10	1.2899	0.36726	0.051861
CL 18:2_18:2_18:2_18:2	0.4201	-1.2512	0.076351
