# Supplementary material for: Diet modulates the therapeutic effects of dimethyl fumarate mediated by the immunometabolic neutrophil receptor HCAR2
Source: eLife. 2025 Apr 23;14:e98970. doi: 10.7554/eLife.98970 (PMC12113270; doi:10.7554/eLife.98970)
Supplement: Supplementary file 3. [file elife-98970-supp3.xlsx]

## Sheet: Supplementary File 3
	Diet rich in lauric acid			Normal chow diet			High-fiber diet				Quality control
Lipid species	Fold change (FC)	log2(FC)	p-value (raw)	Fold change (FC)	log2(FC)	p-value (raw)	Fold change (FC)	log2(FC)	p-value (raw)		CV%
CAR 12:0	0.93376	-0.098871	0.37038	0.55746	-0.84306	0.11275	0.65976	-0.59998	0.01469		0.0438999		Abbreviation	Lipid class
CAR 14:0	1.0149	0.021341	1	0.56337	-0.82784	0.034987	0.89761	-0.15584	0.43587		0.0489136		CAR	Acylcarnitines
CAR 14:1	0.98163	-0.026741	0.74299	0.51546	-0.95606	0.013272	0.86554	-0.20833	0.35268		0.0636072		CE	Cholesterylester
CAR 14:2	1.3032	0.38201	0.11394	0.517	-0.95176	0.022018	1.0462	0.0652	0.57874		0.0648062		Cer	Ceramides
CAR 16:0	1.1725	0.22965	0.19959	0.61485	-0.70168	0.0029877	1.0409	0.057895	0.79594		0.0397944		CL	Cardiolipin
CAR 16:1	1.2303	0.29898	0.37038	0.40352	-1.3093	0.0041352	1.032	0.045402	0.63053		0.0646002		CoQ	Coenzym Q
CAR 16:2	1.4011	0.48661	0.13879	0.44957	-1.1534	0.0076209	1.0826	0.11454	0.68421		0.0776205		DLCL	Dilysocardiolipin
CAR 18:0	1.0242	0.034435	0.74299	0.8156	-0.29406	0.35623	0.93985	-0.089497	0.68421		0.0591429		FA	(Free) Fatty acid
CAR 18:1	1.2919	0.36949	0.74299	0.4869	-1.0383	0.0041352	1.0546	0.076737	0.63053		0.0687143		HexCer	Hexosylceramide/Cerebroside
CAR 20:0	1.0391	0.055358	0.81481	0.98151	-0.026918	0.60378	1.0183	0.026105	0.97051		0.0474258		LNAPE	N-acyl lysophosphatidylethanolamine
CAR 22:0	0.95738	-0.062831	0.81481	0.8265	-0.27491	0.1333	0.93912	-0.09062	0.63053		0.0631715		LPC	Lysophosphatidylcholine
CAR 24:0	0.92983	-0.10496	0.37038	1.0214	0.030552	0.78019	0.94766	-0.077553	0.52885		0.195132		LPC O	Ether-linked lysophosphatidylcholine/plasmalogen LPC
CAR 24:1	1.0482	0.067917	0.60584	0.94712	-0.078381	0.7197	1.1765	0.23445	0.043257		0.0506499		LPE	Lysophosphatidylethanolamine
CE 14:0	0.91641	-0.12593	0.60584	0.94875	-0.075897	0.90483	1.0379	0.053634	0.73936		0.026516		LPE O	Ether-linked lysophosphatidylethanolamine/plasmalogen LPE
CE 17:0	1.3394	0.42155	0.007898	0.93731	-0.093405	0.44697	1.0192	0.027401	0.79594		0.140944		LPI	Lysophosphatidylinositol
CE 18:3	1.3856	0.47049	0.02065	0.78049	-0.35755	0.40018	1.263	0.33688	0.075256		0.0227189		LPS	Lysophosphatidylserine
CE 20:1	1.2687	0.34337	0.092719	0.9186	-0.12249	0.4967	0.88914	-0.16952	0.52885		0.0852327		PA	Phosphatidic acid
CE 20:5	1.7307	0.79137	8.2271e-05	0.85134	-0.2322	0.40018	1.0588	0.082443	0.35268		0.0302362		PC	Phosphatidylcholine
CE 24:3	1.1152	0.15732	0.48071	1.0027	0.0038287	0.96824	0.85312	-0.22917	0.052426		0.048717		PC O	Ether-linked phosphatidylcholine/Plasmalogen PC
CE 24:4	1.6079	0.6852	0.046401	0.73545	-0.4433	0.60378	0.92914	-0.10603	0.27986		0.0582348		PE	Phosphatidylethanolamine
CE 24:5	1.5697	0.65046	0.011107	0.76357	-0.38917	0.1333	0.87035	-0.20033	0.27986		0.032721		PE O	Ether-linked phosphatidylethanolamine/Plasmalogen PE
Cer 18:0;2O/16:0	0.56007	-0.83631	0.027396	1.3649	0.44882	0.11275	0.71308	-0.48787	0.08921		0.0987546		PG	Phosphatidylglycerol
Cer 18:0;2O/22:0	0.52588	-0.9272	0.092719	1.1111	0.15198	0.7197	0.69591	-0.52303	0.12301		0.0317988		PI	Phosphatidylinositol
Cer 18:0;2O/23:0	0.46606	-1.1014	0.02065	1.1748	0.23242	0.078893	0.84519	-0.24265	0.63053		0.0229002		PS	Phosphatidylserine
Cer 18:0;2O/24:0	0.44043	-1.183	0.074455	1.3744	0.45875	0.35623	0.7845	-0.35016	0.14314		0.0510679		SE	Steryl ester
Cer 18:0;2O/24:1	0.57098	-0.8085	0.27659	1.3244	0.40538	0.27751	1.2261	0.29403	0.36417		0.103558		SL	Sulfonolipid
Cer 18:0;2O/25:0	0.47161	-1.0843	0.092719	1.3652	0.44916	0.27751	0.91153	-0.13363	0.79594		0.067724		SM	Sphingomyelin
Cer 18:0;3O/14:0;(2OH)	0.93158	-0.10225	0.88836	1.0189	0.027045	0.84211	0.86543	-0.20851	0.38432		0.0252377		ST	Cholesterol sulfate
Cer 18:0;3O/16:0	0.72516	-0.46364	0.42345	1.0969	0.13341	0.18232	0.81888	-0.28828	0.43587		0.0317561		TG	Triacylglyceride
Cer 18:0;3O/16:0;(2OH)	0.98432	-0.022801	0.74299	0.81594	-0.29346	0.053476	0.8228	-0.28139	0.19032		0.0469008		TG O	Ether-linked triacylglyceride
Cer 18:0;3O/20:0	0.80199	-0.31834	0.32127	1.1186	0.1617	0.96824	0.9765	-0.034313	0.9118		0.0409479
Cer 18:0;3O/21:0	0.67878	-0.55899	0.035952	1.0134	0.019156	0.78019	1.1598	0.21393	0.79594		0.054557		Lipid species are represented either as sum composition (carbons and double bonds), or if possible/unambiguous with the composition of acyl chains.
Cer 18:0;3O/22:0	0.92807	-0.1077	0.74299	1.0939	0.12953	0.66072	0.9451	-0.08146	0.73936		0.0350938
Cer 18:0;3O/22:0;(2OH)	0.95778	-0.062232	0.60584	0.82169	-0.28333	0.022018	0.80777	-0.30798	0.12301		0.0495839
Cer 18:0;3O/22:1	1.0088	0.012653	1	1.0674	0.094098	0.90483	0.942	-0.086204	0.73936		0.0420019
Cer 18:0;3O/23:0;(2OH)	1.0352	0.0499	0.88836	0.83096	-0.26715	0.11275	0.91484	-0.1284	0.43587		0.0412419
Cer 18:0;3O/24:0	0.64234	-0.6386	0.19959	0.99562	-0.0063263	0.54896	0.83329	-0.26311	0.315		0.0353847
Cer 18:0;3O/24:0;(2OH)	1.036	0.051069	0.74299	0.73978	-0.43484	0.022018	0.80703	-0.3093	0.12301		0.0462097
Cer 18:0;3O/24:1;(2OH)	0.87529	-0.19217	0.42345	0.75868	-0.39843	0.11119	0.84805	-0.23777	0.27986		0.0399239
Cer 18:0;3O/25:0	0.72063	-0.47267	0.60584	0.98727	-0.018489	0.78019	0.91627	-0.12616	0.48125		0.0525267
Cer 18:1;2O/14:0	0.91826	-0.12302	0.81481	0.9794	-0.030023	0.43774	0.9444	-0.082532	0.47218		0.0477891
Cer 18:1;2O/16:0	0.78561	-0.34812	0.32127	1.0586	0.082132	0.90483	0.86154	-0.21501	0.315		0.0353802
Cer 18:1;2O/20:0	0.92515	-0.11224	0.81481	0.80579	-0.31152	0.1333	1.0194	0.027711	0.52885		0.0370956
Cer 18:1;2O/22:0	0.72812	-0.45775	0.23587	0.88207	-0.18104	0.11275	0.97343	-0.038846	0.79594		0.0596801
Cer 18:1;2O/24:0	0.7843	-0.35053	0.23587	1.0415	0.058723	0.60378	0.99578	-0.0060952	0.9118		0.0765462
Cer 18:1;2O/24:1	0.69343	-0.52817	0.37038	1.0338	0.047914	0.78019	0.97141	-0.04185	0.97051		0.065326
Cer 18:2;2O/22:0	0.99093	-0.013149	0.96257	0.93712	-0.093687	0.4967	0.82372	-0.27977	0.19032		0.0332986
Cer 18:2;2O/24:1	0.8365	-0.25757	0.16717	0.8695	-0.20173	0.21102	0.87461	-0.19329	0.52885		0.0319854
Cer 20:0;3O/24:0	0.71564	-0.48269	0.16717	1.0641	0.089661	1	0.7451	-0.4245	0.19032		0.0559302
Cer 21:0;2O/16:3;(3OH)(FA 18:1)	0.86998	-0.20095	0.88836	1.0399	0.056405	0.96824	1.0586	0.082109	0.63053		0.0773717
CL 18:2_18:2_18:2_18:2	1.5556	0.63748	0.81481	1.766	0.82045	0.60378	0.95518	-0.066156	0.73936		0.0188566
CoQ10	1.1033	0.14186	0.11394	0.69349	-0.52805	0.09472	0.92683	-0.10962	0.63053		0.0438429
CoQ8	0.76835	-0.38017	0.035952	0.65499	-0.61047	0.1333	1.0868	0.12006	0.73936		0.0393195
CoQ9	0.90765	-0.13979	0.27659	0.67846	-0.55966	0.24281	0.95203	-0.070918	0.85343		0.0401464
DLCL 18:1_18:2	1.1488	0.20015	0.23587	0.90504	-0.14394	0.44697	0.97905	-0.030542	0.68421		0.0405577
DLCL 18:2_18:2	0.98272	-0.025143	0.96257	0.85533	-0.22544	0.40018	0.932	-0.10159	0.68421		0.0536779
FA 18:1	0.80946	-0.30497	0.27659	0.54189	-0.88393	0.0041352	0.92397	-0.11409	0.63053		0.0227524
FA 18:2	0.8993	-0.15313	0.96257	0.52953	-0.91722	0.0076209	0.85954	-0.21836	0.68421		0.0530807
FA 20:0	0.98606	-0.02025	0.96257	1.0013	0.0018979	0.78019	1.2006	0.2637	0.16549		0.0524503
FA 20:4	0.97039	-0.043359	0.60584	0.72784	-0.45831	0.23624	1.0844	0.11694	0.315		0.0778584
FA 22:6	0.85144	-0.23202	0.13879	0.50077	-0.99779	0.017212	1.0913	0.12605	0.24745		0.0708725
HexCer 18:0;3O/12:0;(2OH)	0.77091	-0.37537	0.11394	1.0988	0.13587	0.80633	0.99433	-0.0082079	0.97051		0.0341872
HexCer 18:0;3O/14:0;(2OH)	0.98188	-0.026378	0.67297	0.95067	-0.072979	0.60378	0.89993	-0.15212	0.21756		0.0282182
HexCer 18:0;3O/16:0;(2OH)	1.0411	0.058099	0.67297	0.78759	-0.34448	0.022018	0.84875	-0.2366	0.21756		0.0458594
HexCer 18:0;3O/22:0;(2OH)	0.95636	-0.064368	0.81481	0.81609	-0.29321	0.053476	0.79847	-0.32469	0.315		0.0621927
HexCer 18:0;3O/23:0;(2OH)	0.99585	-0.0060058	0.81481	0.83809	-0.25482	0.078893	0.88123	-0.18241	0.43587		0.029507
HexCer 18:0;3O/24:0;(2OH)	1.1348	0.18245	0.96257	0.65642	-0.60732	0.022018	0.73592	-0.44238	0.043257		0.045638
HexCer 18:1;2O/14:0	0.85925	-0.21885	0.23587	1.0027	0.0038897	0.90483	1.0526	0.073977	0.48125		0.0460688
HexCer 18:1;2O/16:0	0.77413	-0.36935	0.074455	1.0126	0.01803	0.60378	0.94508	-0.081495	0.52885		0.0417477
HexCer 18:1;2O/20:0	1.0828	0.11481	0.54142	0.84855	-0.23693	0.078893	1.0013	0.0018122	0.73936		0.0391964
HexCer 18:1;2O/22:0	0.83278	-0.26399	0.67297	0.93173	-0.10202	0.96824	1.0141	0.020254	0.43587		0.0421524
HexCer 18:1;2O/22:1	0.97457	-0.037158	0.60584	0.98593	-0.020437	1	1.0703	0.097964	0.52885		0.042607
HexCer 18:1;2O/23:0	1.0432	0.061047	0.54142	0.97547	-0.035837	0.66072	1.0277	0.039426	0.85343		0.050208
HexCer 18:1;2O/24:0	1.0005	0.00071307	0.96257	0.9399	-0.089421	0.27751	0.95125	-0.072103	0.315		0.0356783
HexCer 18:1;2O/24:1	0.78937	-0.34122	0.092719	0.9704	-0.043356	0.96824	0.97235	-0.04045	0.79594		0.0550471
HexCer 18:1;2O/24:2	1.0121	0.017387	0.96257	0.8966	-0.15746	0.24281	1.0797	0.11061	0.43587		0.0393122
LNAPE 16:0/N-18:0	1.179	0.23754	0.23587	1.0002	0.00033838	0.48748	1.1203	0.16388	0.27986		0.0572375
LNAPE 16:1/N-18:0	0.92729	-0.1089	0.54142	1.1582	0.21193	0.7197	1.1272	0.17279	0.27986		0.0651746
LNAPE 18:0/N-20:0	1.1153	0.15744	0.81481	0.86325	-0.21215	0.21102	1.1222	0.16635	0.48125		0.0404949
LNAPE 18:1/N-18:0	1.0956	0.13171	0.96257	0.91641	-0.12593	0.60378	1.1457	0.19619	0.052426		0.02867
LNAPE 18:1/N-20:0	0.98596	-0.0204	0.54142	0.92846	-0.10709	0.78019	1.0298	0.042382	0.57874		0.0449975
LNAPE 18:1/N-20:1	1.0664	0.092814	0.74299	0.98342	-0.024127	0.7197	1.085	0.11764	0.43587		0.0148123
LNAPE 18:1/N-21:0	0.89992	-0.15213	0.32127	0.98573	-0.020731	0.7197	1.0553	0.077644	0.79594		0.0379707
LNAPE 18:2/N-20:0	1.0715	0.099615	0.67297	0.90943	-0.13696	0.40018	0.97142	-0.041826	0.79594		0.0534106
LNAPE 18:2/N-21:0	0.92775	-0.1082	0.81481	1.0082	0.011721	0.44697	1.0724	0.10089	0.85343		0.0398669
LNAPE 20:1/N-20:0	0.78227	-0.35426	0.092719	0.83577	-0.25881	0.12066	1.0899	0.12423	0.57874		0.0487732
LNAPE 20:2/N-20:0	0.87514	-0.19241	0.23587	0.8622	-0.21391	0.043474	1.0383	0.054254	0.315		0.0505096
LNAPE 22:2	0.68076	-0.55478	0.035952	0.99785	-0.0031032	0.40018	0.60498	-0.72504	0.315		0.0497851
LNAPE 22:4/N-20:0	1.0375	0.053175	0.96257	0.75544	-0.40462	0.09472	1.1031	0.14155	0.12301		0.0573368
LNAPE 22:5/N-18:0	1.2931	0.37085	0.13879	0.69432	-0.52633	0.44697	1.1797	0.23837	0.19032		0.0571362
LNAPE 28:0	0.70768	-0.49883	0.092719	0.95628	-0.064495	0.96742	0.94251	-0.08542	0.9118		0.0452235
LNAPE 32:0	0.84242	-0.24738	0.092719	0.88276	-0.17991	0.4967	1.0153	0.021894	0.79594		0.0464085
LNAPE 34:2	0.77308	-0.37131	0.074455	0.92961	-0.1053	0.78019	1.0057	0.0081427	1		0.0422721
LNAPE 36:0	1.1936	0.25526	0.27659	0.96569	-0.050364	0.4967	1.2076	0.27219	0.063013		0.0392135
LNAPE 40:6	1.4875	0.57288	0.13879	0.92475	-0.11287	0.78019	1.194	0.25578	0.052426		0.0363845
LNAPE 42:5	1.1726	0.22975	0.67297	0.52659	-0.92525	0.66072	1.1312	0.17786	0.12301		0.040991
LNAPE 42:6	1.3414	0.42377	0.02065	0.85831	-0.22043	0.21102	1.1835	0.24309	0.24745		0.0551192
LPC 10:0	0.67592	-0.56508	0.19959	0.89761	-0.15584	0.31538	1.1655	0.22096	0.9118		0.0709882
LPC 12:0	0.72709	-0.45979	0.27659	0.79608	-0.32902	0.44697	0.60542	-0.724	0.48125		0.229405
LPC 14:0	0.94888	-0.075707	1	1.1894	0.25028	0.60378	0.97346	-0.038807	1		0.0487605
LPC 14:1	0.81056	-0.30301	0.54142	1.4998	0.58474	0.78019	0.90284	-0.14746	0.63053		0.0740901
LPC 16:1	0.95009	-0.073858	0.48071	1.3056	0.38469	0.40018	1.0152	0.021754	0.97051		0.0320126
LPC 17:0	1.2433	0.31418	0.32127	1.1377	0.1861	0.60378	1.1786	0.23713	0.043257		0.0532447
LPC 17:1	1.1599	0.21394	0.48071	1.1062	0.14557	0.96824	1.2195	0.28628	0.27986		0.0450552
LPC 17:2	1.1096	0.15002	0.54142	1.0587	0.082357	0.96824	0.91447	-0.12899	0.57874		0.0466435
LPC 18:0	1.0492	0.069349	0.88836	1.0826	0.11446	0.31538	1.0916	0.1265	0.27986		0.0642433
LPC 18:1	1.1227	0.16694	0.60584	1.0244	0.034758	0.66072	0.99519	-0.0069518	0.48125		0.0761646
LPC 18:2	0.92859	-0.10689	0.67297	1.1001	0.13762	0.44697	1.0299	0.042448	0.97051		0.0476767
LPC 18:3	0.9837	-0.023705	0.96257	1.2213	0.28842	0.4967	1.2249	0.29262	0.10512		0.0489213
LPC 19:1	1.0456	0.064336	0.60584	1.3076	0.38692	0.31538	1.1731	0.23036	0.35268		0.0486431
LPC 20:0	1.0166	0.023723	0.81481	1.1108	0.15162	0.31538	1.0976	0.13434	0.27986		0.0563015
LPC 20:2	1.1169	0.15946	0.48071	1.2505	0.32255	0.18232	1.178	0.23637	0.21756		0.050918
LPC 20:3	1.0099	0.014281	0.88836	1.1564	0.20965	0.54896	1.1414	0.19081	0.9118		0.0458611
LPC 21:0	0.89432	-0.16113	0.37038	1.1265	0.17182	0.40018	1.0845	0.11704	0.48125		0.0737543
LPC 21:1	1.1677	0.22371	0.54142	0.99541	-0.0066397	0.96824	2.1146	1.0804	0.028806		0.0740183
LPC 22:0	1.1082	0.14816	0.42345	1.1436	0.19358	0.24281	0.94196	-0.086258	0.52885		0.0568389
LPC 22:1	0.97869	-0.031077	1	1.0873	0.1207	0.31538	1.0363	0.051492	0.68421		0.0480961
LPC 22:2	0.89472	-0.16049	0.96257	1.0669	0.093485	0.4967	1.2404	0.31078	0.52885		0.0614539
LPC 22:3	0.8816	-0.1818	0.54142	1.2439	0.31492	0.44697	1.1756	0.23342	0.39305		0.0658202
LPC 22:4	1.1371	0.18531	0.54142	1.0207	0.029502	0.35623	1.143	0.19288	0.10512		0.0309486
LPC 22:5	1.1197	0.16312	0.48071	1.1478	0.19888	0.60378	1.1151	0.15718	0.68421		0.0414799
LPC 22:6	1.1581	0.21176	0.48071	1.1034	0.14201	0.27751	1.1691	0.22542	0.19032		0.0317199
LPC 24:0	1.0961	0.13243	0.42345	1.2561	0.32896	0.053476	1.0995	0.13678	0.52885		0.0802636
LPC 24:1	1.0224	0.03192	0.74299	1.1908	0.2519	0.09472	1.0068	0.009708	0.85343		0.0707828
LPC 24:3	0.9254	-0.11185	0.88836	1.1328	0.17994	0.44697	1.2634	0.3373	0.73936		0.0558644
LPC 24:4	0.96988	-0.044121	1	1.2387	0.3088	0.1564	1.0765	0.10628	0.79594		0.063693
LPC 24:5	0.75391	-0.40753	0.16717	0.90983	-0.13633	0.96824	1.1299	0.17621	0.48125		0.0854246
LPC 26:1	1.0355	0.050287	0.67297	1.1331	0.18021	0.11275	1.1194	0.16266	0.27986		0.078851
LPC 26:2	0.97508	-0.036408	1	1.0822	0.11403	0.35623	1.0633	0.088547	0.48125		0.0579561
LPC O-16:0	1.3032	0.38206	0.19959	1.1558	0.20895	0.35623	1.0712	0.099241	0.43587		0.0603247
LPC O-16:1	1.2911	0.36859	0.23587	1.1757	0.23353	0.21102	1.1143	0.15618	0.27986		0.0499241
LPC O-18:0	1.0152	0.021786	1	1.0562	0.078909	0.78019	1.1207	0.16434	0.35268		0.0589795
LPC O-18:1	1.1385	0.18715	0.42345	1.3845	0.46942	0.21102	0.98385	-0.023492	0.73936		0.0512826
LPC O-19:0	0.95056	-0.073143	0.74299	1.0614	0.085909	0.66072	1.2854	0.36225	0.08921		0.0931948
LPC O-20:0	1.005	0.0071486	0.96257	1.0405	0.057343	0.54896	1.1207	0.1644	0.10512		0.0497908
LPC O-22:0	0.99471	-0.007646	0.96257	1.0637	0.089096	0.7197	1.1505	0.20231	0.14314		0.0717041
LPC O-22:1	1.1798	0.2385	0.67297	1.0044	0.0063572	0.90483	1.0893	0.12342	0.315		0.0517131
LPC O-24:1	1.0249	0.035553	0.96257	1.0545	0.076598	1	1.0447	0.063047	0.35268		0.0915717
LPC O-24:2	1.0581	0.081423	0.88836	1.0078	0.011227	0.54896	0.90363	-0.1462	0.21756		0.0590545
LPE 16:0	1.0248	0.035397	0.81481	1.0201	0.028682	0.90483	1.0835	0.11568	0.39305		0.037309
LPE 17:0	1.1122	0.15347	0.42345	1.1107	0.15147	0.54896	0.95152	-0.071687	0.9118		0.0631437
LPE 18:0	1.0818	0.11339	0.81481	0.94953	-0.074721	0.4967	1.0016	0.0023208	0.9118		0.0503856
LPE 18:1	0.96231	-0.055423	0.96257	1.136	0.18394	0.1564	1.0527	0.07409	0.79594		0.0231626
LPE 18:2	0.97349	-0.038764	0.96257	1.1762	0.23411	0.11275	0.92766	-0.10834	0.57874		0.0347761
LPE 20:4	1.0518	0.072872	0.32127	1.0317	0.045026	0.78019	1.2412	0.31178	0.043257		0.0393295
LPE 22:5	0.96186	-0.0561	0.60584	1.1082	0.14821	0.96824	1.4669	0.55276	0.018543		0.027442
LPE 22:6	0.94757	-0.077689	0.60584	0.98947	-0.015269	0.96824	1.574	0.6544	0.005196		0.0313829
LPE O-16:1	1.2153	0.28134	0.23587	1.2772	0.35297	0.1564	0.97884	-0.03085	0.79594		0.0427183
LPE O-18:1	1.0546	0.076692	0.81481	1.154	0.2067	0.7197	0.92953	-0.10542	0.48125		0.0491394
LPI 18:0	1.3235	0.40439	0.16717	1.0984	0.13543	0.90483	1.3135	0.39347	0.063013		0.129457
LPI 18:1	0.99538	-0.0066819	0.74299	1.2862	0.36312	0.4967	1.4433	0.52937	0.52885		0.10066
LPI 18:2	1.0146	0.020866	0.96257	1.0301	0.042743	0.96824	1.0426	0.060191	0.68421		0.0906322
LPI 20:3	1.3108	0.3905	0.27659	1.047	0.066262	0.71318	0.96799	-0.04694	0.87978		0.0852907
LPI 22:6	1.3926	0.47779	0.23587	1.0664	0.09273	0.7197	1.4515	0.53753	0.10512		0.097504
PC 12:0_12:0	0.77073	-0.37571	0.32127	0.95513	-0.066231	0.78019	0.30299	-1.7226	1		0.0465866
PC 16:0_18:3	0.93345	-0.099348	0.74299	1.1473	0.19819	0.35623	1.2784	0.35437	0.16181		0.0169993
PC 16:0_20:3	0.76584	-0.38489	0.37038	1.306	0.38516	0.21102	1.0689	0.096128	0.79126		0.0240523
PC 16:0_20:4	1.1735	0.23077	0.23587	1.0915	0.12629	0.1333	1.0129	0.018421	0.27986		0.0691157
PC 16:0_22:4	0.97499	-0.036547	0.74299	1.2223	0.28957	0.21102	1.2099	0.27487	0.27986		0.028475
PC 16:0_22:5	1.2116	0.27688	0.027396	1.0714	0.099535	0.4967	1.1478	0.19885	0.08921		0.0831281
PC 16:0_22:6	1.2338	0.30316	0.027396	1.0837	0.11601	0.1333	1.2774	0.35325	0.25666		0.0172411
PC 17:0_18:2	1.0547	0.076779	0.67297	1.001	0.0014161	1	0.98036	-0.028614	0.97051		0.187763
PC 17:0_20:4	1.3173	0.39755	0.059235	0.93831	-0.091867	0.60378	1.2111	0.27632	0.0089307		0.0200874
PC 17:0_22:6	1.4261	0.51206	0.0037022	0.87008	-0.20079	0.4967	1.2272	0.29536	0.12108		0.0209796
PC 17:1_18:2	0.93345	-0.099349	0.48071	1.1484	0.19965	0.66072	0.91752	-0.1242	0.315		0.0315612
PC 17:1_20:4	1.3878	0.47283	0.074455	0.91399	-0.12976	0.54896	1.1058	0.1451	0.39305		0.0400047
PC 18:0_18:1	0.86536	-0.20863	0.13879	1.1551	0.20798	0.40018	0.95589	-0.065086	0.57874		0.0501624
PC 18:0_18:2	0.96046	-0.058207	0.67297	0.99658	-0.0049464	0.60378	0.97087	-0.042646	0.96984		0.0641744
PC 18:0_20:4	1.1103	0.15093	0.42345	1.0184	0.026306	0.78019	0.98476	-0.022157	0.79594		0.027791
PC 18:0_22:3	0.87391	-0.19445	0.37038	1.1057	0.14491	0.27751	1.1884	0.24897	0.18571		0.031644
PC 18:0_22:4	0.8389	-0.25343	0.48071	0.96683	-0.048664	0.54896	1.1511	0.20307	0.85343		0.0309667
PC 18:0_22:6	1.0245	0.034874	0.60584	0.90839	-0.13862	0.96824	1.0547	0.076889	0.5452		0.0237569
PC 18:0_24:4	1.0061	0.0087058	0.88836	0.98224	-0.025854	0.84211	1.3086	0.38807	0.14314		0.0304301
PC 18:1_18:1	0.93086	-0.10336	0.74299	1.2469	0.31835	0.27751	1.0524	0.073749	0.79126		0.075603
PC 18:1_18:2	0.97419	-0.037723	0.81481	1.12	0.16346	0.54896	0.98418	-0.023006	1		0.0910784
PC 18:1_20:3	1.0428	0.060443	0.74299	1.1353	0.18303	0.54896	0.74498	-0.42473	0.315		0.116766
PC 18:1_22:0	0.81879	-0.28844	0.11394	1.297	0.37513	0.053476	1.0518	0.072918	0.79594		0.0307654
PC 18:1_22:5	1.0945	0.1303	0.54142	1.3243	0.4052	0.31538	1.2136	0.27924	0.34452		0.0224623
PC 18:2_18:2	0.85488	-0.22621	0.42345	1.1434	0.19329	0.24281	0.9655	-0.050653	1		0.0313155
PC 18:2_20:4	1.2556	0.32838	0.16717	1.1039	0.14264	0.40018	1.1137	0.1554	0.57874		0.0363216
PC 18:2_22:0	0.75852	-0.39874	0.035952	1.0373	0.052856	0.44697	0.90236	-0.14822	0.43587		0.0281811
PC 18:2_22:1	0.82705	-0.27395	0.11394	0.98384	-0.023508	0.96824	1.0856	0.1185	1		0.0521817
PC 18:2_24:0	0.73157	-0.45092	0.059235	0.99073	-0.013434	0.7197	0.91393	-0.12984	0.52037		0.0466984
PC 19:0_20:4	1.0186	0.026545	0.60584	1.0123	0.017597	0.96824	1.2633	0.33721	0.08921		0.0337008
PC 19:1_20:4	1.1197	0.16306	0.60584	1.0499	0.07023	0.44697	1.2431	0.31397	0.12301		0.0241793
PC 20:0_20:3	0.81046	-0.30319	0.16717	1.0404	0.057145	0.90483	0.90151	-0.14958	0.44952		0.0522976
PC 20:0_20:4	0.97966	-0.029646	0.67297	1.0155	0.022206	0.54896	1.0521	0.073249	0.76228		0.04362
PC 20:0_22:6	1.0805	0.11172	0.67297	0.94785	-0.077273	1	1.1484	0.19962	0.68421		0.0529031
PC 20:1_22:5	0.92819	-0.10752	0.42345	1.028	0.039847	0.7197	1.1738	0.23124	0.096179		0.0189312
PC 20:1_22:6	1.1065	0.14597	0.32127	1.1113	0.15225	0.27751	1.1559	0.20899	0.43587		0.0459183
PC 20:2_20:4	1.1663	0.22196	0.16717	0.80514	-0.31269	0.35623	1.2483	0.31996	0.08921		0.0173579
PC 20:2_22:5	0.98187	-0.026393	0.96257	0.97669	-0.034027	1	1.3167	0.39691	0.08921		0.0250258
PC 20:4_22:4	1.2957	0.37376	0.01522	1.0306	0.043545	0.84211	1.2756	0.35113	0.10512		0.0280064
PC 20:4_22:5	1.3124	0.3922	0.11394	0.97877	-0.03096	0.84211	1.1774	0.23563	0.21212		0.0219866
PC 20:4_22:6	1.6042	0.68184	0.007898	1.1746	0.23222	0.24281	1.0975	0.13427	0.48125		0.0239135
PC 20:4_24:1	0.93986	-0.089483	0.67297	1.1921	0.25345	0.56746	1.0805	0.11176	0.79594		0.0427024
PC 20:4_24:4	1.9319	0.95003	0.0037022	1.111	0.15182	0.54896	1.1192	0.16249	0.63053		0.0146573
PC 22:0	0.82177	-0.28319	0.48071	0.8588	-0.21961	0.84211	1.575	0.65532	0.39305		0.0300389
PC 22:0_20:4	1.048	0.067629	0.88836	1.1381	0.18669	0.31538	1.0531	0.074662	0.63053		0.0320572
PC 22:5_22:6	1.5712	0.65186	0.02065	1.0912	0.12596	0.4967	1.4769	0.5626	0.075552		0.0292302
PC 24:0_18:1	0.87611	-0.19082	0.37038	1.2294	0.29792	0.18232	1.0889	0.12284	1		0.028955
PC 24:0_20:4	1.1472	0.19809	0.19959	1.1372	0.18553	0.66072	1.0441	0.062259	0.79594		0.0290396
PC 26:0	0.71736	-0.47922	0.16717	1.0556	0.07804	0.32697	0.54733	-0.86951	0.30713		0.0425197
PC 26:1	0.78443	-0.35028	0.32127	1.0453	0.063882	0.34753	1.1228	0.16705	0.48125		0.041798
PC 27:0	0.72259	-0.46875	0.19959	1.1462	0.19692	0.31538	0.78437	-0.3504	0.4055		0.0645448
PC 28:0	0.77886	-0.36056	0.19959	1.1159	0.15823	0.54896	0.74346	-0.42767	0.54505		0.0320107
PC 28:1	0.69842	-0.51783	0.23587	1.4506	0.53668	0.015965	0.6909	-0.53344	0.24114		0.0336066
PC 28:2	0.72286	-0.4682	0.27659	1.1547	0.20757	0.13057	0.45594	-1.1331	0.59656		0.0433738
PC 29:0	0.78017	-0.35815	0.16717	0.93654	-0.094586	0.60378	1.026	0.036983	1		0.0215073
PC 29:1	0.61731	-0.69593	0.059235	1.0141	0.020196	0.7197	0.92237	-0.11658	0.52885		0.0301099
PC 30:0	0.7903	-0.33952	0.11394	1.1145	0.15636	0.66072	0.91715	-0.12476	0.85005		0.0260082
PC 30:1	0.80084	-0.32041	0.37038	1.4904	0.57568	0.35623	0.85132	-0.23222	0.85005		0.0356993
PC 30:2	0.67802	-0.56061	0.059235	1.1279	0.17369	0.60378	0.62516	-0.67771	0.57061		0.0333358
PC 31:0	1.031	0.044062	0.96257	0.96964	-0.044484	0.66072	1.0902	0.12465	0.39305		0.0274481
PC 31:1	0.89333	-0.16273	0.37038	1.3796	0.46421	0.40018	1.0391	0.055289	0.93972		0.0369949
PC 32:0	1.0307	0.043636	0.96257	1.1519	0.20401	0.09472	1.0928	0.12802	0.4055		0.0189806
PC 32:1	0.83031	-0.26828	0.11394	1.325	0.406	0.40018	1.0647	0.090498	0.70535		0.0411367
PC 32:2	0.75901	-0.39781	0.11394	1.2456	0.31683	0.54896	0.99134	-0.012545	0.93972		0.0260352
PC 32:3	0.55394	-0.8522	0.035952	1.2655	0.33967	0.90483	1.0205	0.029277	1		0.0730199
PC 32:4	0.73401	-0.44613	0.13879	1.1759	0.23372	0.80633	0.80452	-0.31381	0.49613		0.0280669
PC 33:0	0.9925	-0.010868	0.60584	1.1049	0.14392	0.44697	1.1631	0.218	0.27986		0.0207775
PC 33:1	0.99771	-0.0033071	0.88836	1.1912	0.25238	0.44697	1.1263	0.17157	0.08921		0.0174604
PC 33:2	0.95091	-0.072621	0.81481	1.0785	0.10905	0.96824	0.9714	-0.041864	0.79594		0.0180708
PC 33:3	0.96366	-0.053402	0.96257	1.0706	0.098388	0.90483	1.122	0.16604	0.57874		0.0727402
PC 34:0	1.2489	0.3206	0.13879	1.1065	0.14599	0.18232	1.1186	0.16173	0.4055		0.0508787
PC 34:1	0.94672	-0.078997	0.54142	1.0983	0.13529	0.35623	1.1016	0.13957	0.4055		0.0161058
PC 34:2	1.0563	0.078986	0.48071	1.1327	0.17981	0.027929	1.0511	0.071901	1		0.017727
PC 34:3	0.96211	-0.055727	0.88836	1.0071	0.010184	0.84211	1.0761	0.10579	0.63053		0.0280719
PC 34:4	0.98918	-0.015699	1	1.2321	0.30108	0.40018	1.08	0.11103	0.65002		0.0457377
PC 34:5	0.88238	-0.18053	0.37038	1.3283	0.40953	0.66072	1.044	0.062095	0.73363		0.0399394
PC 34:6	0.90161	-0.14943	0.74299	1.1211	0.16488	0.3689	0.75949	-0.3969	0.40533		0.0929866
PC 35:1	1.0205	0.029212	0.96257	1.1669	0.22262	0.96824	1.1382	0.1868	0.12301		0.025566
PC 35:4	1.427	0.51301	0.092719	1.11	0.15056	0.7197	1.1367	0.18486	0.35268		0.026282
PC 36:0	1.0665	0.092873	0.60584	1.0248	0.035285	0.60378	1.1257	0.17077	0.49613		0.0373309
PC 37:1	0.86205	-0.21416	0.42345	1.1481	0.19929	0.54896	1.0758	0.10543	0.73363		0.0674917
PC 37:2	0.95947	-0.059688	0.48071	1.0636	0.08895	0.66072	1.009	0.012986	0.79126		0.029091
PC 37:4	1.315	0.39511	0.13879	1.06	0.084057	0.84211	1.1899	0.25081	0.11228		0.0218263
PC 37:6	1.3787	0.46332	0.046401	1.0495	0.069647	0.78019	1.2812	0.3575	0.14032		0.0270743
PC 38:1	0.75662	-0.40237	0.046401	1.1122	0.15345	0.40018	1.1809	0.23994	0.28974		0.0474551
PC 38:2	0.77326	-0.37098	0.16717	1.0206	0.02937	0.78019	1.1104	0.15111	0.57874		0.0394332
PC 38:3	0.98479	-0.022112	0.88516	1.0233	0.033234	0.96824	1.0939	0.12951	0.42718		0.0189511
PC 38:5	1.1752	0.23286	0.23587	1.1343	0.1818	0.27751	1.1585	0.21222	0.2263		0.0322374
PC 39:0	1.2764	0.35206	0.092719	1.333	0.41473	0.11275	1.1562	0.20942	0.52885		0.0573094
PC 39:1	0.74636	-0.42205	0.074455	0.96962	-0.044507	0.96824	1.414	0.49976	0.081984		0.0660068
PC 39:2	0.80139	-0.31943	0.035952	1.0649	0.090773	0.78019	1.1002	0.13771	0.68421		0.0686871
PC 39:3	0.95533	-0.065928	0.74299	1.1916	0.25284	0.31538	1.1622	0.21688	0.315		0.0267281
PC 39:5	1.2034	0.26711	0.32127	1.1633	0.21819	0.35623	1.2377	0.3076	0.096179		0.018565
PC 39:7	1.4366	0.52268	0.011107	1.0248	0.035369	0.78019	1.3215	0.40213	0.10512		0.0298745
PC 40:0	1.2943	0.37213	0.19959	1.336	0.41787	0.24281	1.0298	0.042313	0.93972		0.0244171
PC 40:5	1.0394	0.055781	0.88836	1.1146	0.15648	0.27751	1.1117	0.15282	0.73936		0.0248997
PC 40:7	1.1892	0.25004	0.092719	1.0003	0.00045736	0.90483	1.1011	0.13899	0.47251		0.0247183
PC 40:8	1.2927	0.37034	0.19959	1.0807	0.11202	0.60378	1.1602	0.21436	0.34452		0.0384522
PC 40:9	1.3087	0.38815	0.16717	0.98668	-0.019342	0.84211	1.0174	0.024894	0.48125		0.0348446
PC 41:2	0.75218	-0.41086	0.092719	1.1394	0.18822	0.54896	0.70863	-0.49689	0.075256		0.0293611
PC 41:5	0.91816	-0.12318	0.60584	1.2264	0.29443	0.31538	1.2747	0.35016	0.16549		0.0225966
PC 41:6	0.90283	-0.14748	0.27659	1.012	0.017206	0.66072	1.3052	0.38425	0.14314		0.0451582
PC 41:7	1.0445	0.062874	0.60584	0.94641	-0.079461	0.66072	1.2589	0.33213	0.19032		0.0345978
PC 42:2	0.84845	-0.2371	0.16717	1.1677	0.22363	0.24281	1.14	0.18909	0.4055		0.0353318
PC 42:3	0.83097	-0.26713	0.27659	1.1635	0.21853	0.24281	1.0503	0.07081	0.73936		0.0352815
PC 44:12	1.8229	0.86625	0.074455	1.1715	0.22836	0.54896	1.0386	0.054707	0.57874		0.0330734
PC O-16:0_20:3	0.91334	-0.13078	0.37038	1.0409	0.057862	0.96824	1.0593	0.083045	0.4055		0.0121858
PC O-16:0_22:3	0.94093	-0.087846	0.48071	0.88265	-0.18009	0.27751	1.0843	0.11681	0.57874		0.0513402
PC O-16:0_22:5	1.209	0.27385	0.16717	0.9127	-0.13178	0.84211	1.031	0.043982	0.59656		0.015991
PC O-16:0_22:6	1.39	0.47508	0.011107	0.9489	-0.075677	0.7197	0.90076	-0.15078	0.79594		0.0545501
PC O-16:1_22:5	1.2632	0.33713	0.074455	1.0206	0.02945	1	1.0624	0.087385	1		0.0116642
PC O-18:0_18:2	0.87356	-0.19502	0.13879	0.87149	-0.19844	0.60378	1.0634	0.0887	0.52885		0.0377274
PC O-18:0_20:3	0.9018	-0.14912	0.48071	0.80326	-0.31607	0.21102	1.0632	0.088386	0.63053		0.0411188
PC O-18:0_20:4	0.94016	-0.089024	0.96257	0.82283	-0.28134	0.54896	0.96123	-0.057052	0.79594		0.0388464
PC O-18:0_22:4	1.1419	0.19149	0.37038	0.80691	-0.30951	0.31538	0.98235	-0.025694	0.90969		0.0471173
PC O-18:0_22:6	1.189	0.24974	0.046401	0.85838	-0.2203	0.66072	1.0901	0.12446	0.57874		0.0182667
PC O-18:1_18:1	0.93186	-0.10182	0.74299	0.82478	-0.27791	0.1564	0.84163	-0.24874	0.19032		0.0198633
PC O-18:1_18:2	1.0162	0.023141	0.81481	0.90704	-0.14077	0.66072	0.9809	-0.02782	0.85343		0.0178863
PC O-18:1_20:4	1.2423	0.31302	0.13879	0.97363	-0.038555	0.84211	0.99346	-0.0094607	0.76228		0.0307699
PC O-18:1_22:1	1.3426	0.42507	0.19959	0.55626	-0.84618	0.078893	0.93624	-0.095056	0.87978		0.0435707
PC O-18:1_22:5	1.1602	0.21442	0.54142	0.7521	-0.411	0.11275	0.9694	-0.044842	0.73936		0.056522
PC O-18:2_20:4	1.0681	0.094995	0.74299	0.84559	-0.24197	0.1564	0.99731	-0.003885	0.9118		0.0577272
PC O-18:2_22:0	0.83978	-0.25191	0.67297	0.97787	-0.032281	0.96824	1.1687	0.22491	0.57874		0.0529078
PC O-20:0_20:4	1.1234	0.1679	0.27659	0.90012	-0.15181	0.27751	1.1411	0.1904	0.34452		0.0183755
PC O-20:0_22:5	1.0431	0.060819	0.74299	1.0232	0.033146	1	1.1599	0.21402	0.315		0.022738
PC O-20:2_20:4	1.271	0.34602	0.092719	0.91728	-0.12457	0.60378	1.0411	0.058085	0.79126		0.0231497
PC O-20:4_24:1	1.1351	0.18284	0.54142	1.0005	0.00079316	0.84211	0.99712	-0.0041575	1		0.0266218
PC O-22:0_20:4	1.0241	0.034339	0.42345	0.92544	-0.11178	0.54896	1.008	0.011481	1		0.0238661
PC O-22:1_20:4	1.3566	0.43998	0.074455	0.86468	-0.20976	0.23624	1.0226	0.032287	0.93972		0.0176727
PC O-22:2_20:4	1.2452	0.31642	0.60584	0.9881	-0.017277	0.68296	0.91574	-0.127	0.52885		0.0488757
PC O-25:1	1.1551	0.20803	0.54142	1.1245	0.16925	0.44697	1.0454	0.063994	0.85343		0.0450142
PC O-26:0	0.73555	-0.4431	0.027396	1.0513	0.072205	0.78019	0.99973	-0.00039184	0.47184		0.038849
PC O-28:0	0.85494	-0.22611	0.074455	1.059	0.082672	0.24281	0.9743	-0.03756	0.93972		0.0336087
PC O-30:0	0.99725	-0.0039729	0.88836	0.8822	-0.18083	0.18232	0.91124	-0.1341	0.36417		0.0288893
PC O-32:0	1.0122	0.01755	0.88836	0.84761	-0.23853	0.18232	0.8626	-0.21324	0.14314		0.0232046
PC O-32:1	1.0568	0.079696	0.60584	0.83716	-0.25642	0.1333	0.83049	-0.26796	0.096179		0.0179156
PC O-32:2	1.0831	0.1151	0.23587	0.89451	-0.16083	0.84211	0.8989	-0.15376	0.62305		0.0304297
PC O-32:3	1.2685	0.34316	0.19959	0.98834	-0.016923	0.84211	0.86233	-0.2137	0.73936		0.0473192
PC O-34:0	1.02	0.028572	0.67297	0.97262	-0.040044	0.78019	1.0167	0.023962	0.90969		0.0216787
PC O-34:1	1.0843	0.1167	0.42345	1.023	0.032746	0.96824	0.94887	-0.075722	0.52037		0.023049
PC O-34:2	0.95043	-0.073355	0.42345	0.89738	-0.1562	0.7197	1.0289	0.04109	0.63053		0.0359124
PC O-34:3	1.146	0.19665	0.13879	1.1379	0.18642	0.1333	0.95317	-0.069202	0.85343		0.0144831
PC O-34:4	1.4258	0.51175	0.007898	1.1474	0.19834	0.40018	0.99243	-0.010961	1		0.0374848
PC O-34:5	1.6546	0.7265	0.0015631	0.9561	-0.064767	0.96824	0.90916	-0.13739	0.70535		0.0645411
PC O-35:1	0.79747	-0.3265	0.32127	0.857	-0.22264	0.18232	0.8136	-0.2976	0.24745		0.0338543
PC O-35:2	0.99886	-0.0016434	1	0.92996	-0.10475	0.66072	1.1891	0.24993	0.35268		0.0334632
PC O-36:0	1.2048	0.26877	0.74299	0.93876	-0.091167	0.44697	1.1007	0.13842	0.5452		0.0866201
PC O-36:1	0.90017	-0.15173	0.37038	0.94971	-0.074439	0.84211	1.0993	0.13664	0.68421		0.0261485
PC O-36:4	1.2544	0.32698	0.046401	0.91276	-0.1317	0.4967	1.0477	0.067178	0.85343		0.0209817
PC O-36:5	1.3059	0.3851	0.027396	1.0931	0.12842	0.27751	1.0182	0.026012	0.9118		0.0235905
PC O-36:6	2.229	1.1564	8.2271e-05	0.88455	-0.17698	0.40018	1.5954	0.67394	0.019065		0.0482124
PC O-37:1	0.65489	-0.61068	0.092719	0.97825	-0.031729	0.78019	0.97141	-0.041841	0.96984		0.101056
PC O-38:0	1.0134	0.019231	0.96257	0.92217	-0.11689	0.4967	1.0489	0.06882	1		0.265518
PC O-38:1	0.98761	-0.01799	0.54142	1.0751	0.10449	1	0.98811	-0.017254	0.43587		0.0378464
PC O-38:2	0.99072	-0.013449	0.88836	0.90695	-0.1409	1	1.2265	0.29456	0.19032		0.0395368
PC O-38:4	1.0861	0.11917	0.42345	0.83919	-0.25293	0.66072	0.85967	-0.21815	0.19032		0.0250109
PC O-39:3	0.63265	-0.66051	0.059235	0.70077	-0.51299	0.017212	0.95976	-0.059247	0.90965		0.0998529
PC O-40:1	0.90527	-0.14358	0.54142	0.98806	-0.017329	1	1.0889	0.12287	0.43587		0.0354104
PC O-40:7	1.3193	0.39978	0.046401	0.87525	-0.19224	0.84211	0.99149	-0.012331	1		0.0212433
PC O-40:9	1.0869	0.12016	0.74299	1.1172	0.15986	0.84211	1.0452	0.063746	0.87978		0.0319198
PC O-41:1	1.0769	0.10684	0.19338	1.1929	0.25446	0.13057	0.84746	-0.23878	0.32539		0.0217994
PC O-42:3	0.79323	-0.33419	0.11394	0.91623	-0.12622	1	1.151	0.20288	0.35268		0.0259822
PC O-42:6	1.0202	0.028805	0.96257	0.88649	-0.17382	0.35623	1.3187	0.39907	0.14314		0.0201631
PC O-42:8	1.3013	0.37994	0.19959	0.87825	-0.1873	0.54896	0.94686	-0.078782	0.87978		0.0974924
PC O-44:4	1.0756	0.10509	0.96257	0.90918	-0.13737	0.7197	1.0383	0.05419	0.79594		0.141607
PC O-44:6	1.1567	0.21004	0.16717	1.3065	0.38572	0.053476	1.1401	0.18919	0.17346		0.0964587
PC O-44:8	1.0596	0.083495	1	0.78311	-0.35271	0.1564	0.91247	-0.13215	1		0.0356299
PC O-46:7	1.1032	0.14163	0.54142	0.90703	-0.14077	0.84211	1.1367	0.18484	0.27286		0.0443684
PE 14:0_20:4	0.9361	-0.095263	0.60584	0.87349	-0.19513	0.44697	0.89419	-0.16135	0.73936		0.116011
PE 16:0_20:4	0.96624	-0.049542	0.88836	0.95979	-0.059214	0.54896	1.2573	0.33032	0.028806		0.0638404
PE 16:0_22:5	1.2451	0.31626	0.27659	0.72521	-0.46353	0.90483	1.3022	0.38099	0.011496		0.0471665
PE 16:1_18:1	0.91837	-0.12286	0.60584	1.0438	0.061865	0.90248	1.2291	0.29758	0.08921		0.0520795
PE 17:0_18:2	1.1136	0.15529	0.60584	1.0781	0.10849	0.60378	1.0972	0.13378	0.9118		0.0554871
PE 18:0_18:1	0.82724	-0.27361	0.32127	1.0881	0.12185	0.84211	0.90675	-0.14122	0.48125		0.0569935
PE 18:0_18:2	0.92189	-0.11733	0.60584	0.91478	-0.12851	0.27751	0.91099	-0.13449	0.63053		0.0607817
PE 18:1_18:1	1.1074	0.14718	0.60584	1.1779	0.23617	0.27751	1.0344	0.048859	0.97051		0.0328708
PE 18:1_18:2	0.93458	-0.097612	0.60584	1.044	0.062093	0.83819	0.98601	-0.020321	1		0.0529033
PE 18:1_20:4	1.2164	0.28262	0.37038	0.77847	-0.36129	0.09472	1.2692	0.34393	0.0038862		0.0545939
PE 30:0	0.75377	-0.40781	0.11394	0.68455	-0.54676	0.78019	0.7392	-0.43597	0.19032		0.0440168
PE 30:1	0.62917	-0.66849	0.035952	0.90116	-0.15015	0.7197	1.0144	0.020634	0.79594		0.0339427
PE 32:1	0.71663	-0.48071	0.42345	1.4477	0.53376	0.74386	1.0575	0.080725	0.48125		0.0606386
PE 32:2	0.67938	-0.55771	0.16717	0.81799	-0.28985	0.35623	0.92458	-0.11313	1		0.0850288
PE 34:0	0.94867	-0.076025	0.74299	1.0036	0.005229	1	0.96433	-0.052406	0.73936		0.0520895
PE 34:1	0.82412	-0.27907	0.23587	1.2012	0.26446	0.65324	0.97115	-0.042233	0.97051		0.0655261
PE 34:2	0.90144	-0.1497	0.60584	0.96498	-0.051431	0.7197	1.1042	0.14306	0.57874		0.0503099
PE 36:5	1.3228	0.40361	0.13879	1.0644	0.090089	1	1.4465	0.53259	0.011496		0.054367
PE 38:4	1.1593	0.21319	0.19959	0.95355	-0.068616	0.65324	1.0842	0.11669	0.48125		0.0340524
PE 38:6	1.1312	0.17781	0.67297	0.84773	-0.23833	0.27751	1.3876	0.47259	0.01469		0.0766303
PE 40:4	1.459	0.54499	1	1.0678	0.094583	0.25279	1.1391	0.18789	0.10512		0.0782421
PE 40:5	1.069	0.09632	0.81481	0.58304	-0.77833	0.4967	1.2474	0.3189	0.035463		0.0592893
PE 40:6	0.98039	-0.028576	0.81481	0.76999	-0.37708	0.017212	1.2746	0.35009	0.27986		0.067355
PE O-16:0_18:2	0.78662	-0.34626	0.67297	0.95171	-0.071411	0.51344	1.2035	0.26721	0.43587		0.0429133
PE O-16:1_18:1	0.86092	-0.21604	0.27659	1.0924	0.12745	0.41401	1.0489	0.068815	0.85343		0.0725561
PE O-16:1_18:2	0.83107	-0.26697	0.27659	1.0267	0.038076	0.56746	0.98589	-0.020502	0.63053		0.0550613
PE O-16:1_20:3	0.99873	-0.0018386	0.74299	1.1729	0.23014	0.71318	1.2774	0.35318	0.68421		0.0465481
PE O-16:1_20:4	1.3602	0.44383	0.074455	1.281	0.3573	0.46224	0.96861	-0.046009	0.79594		0.0712487
PE O-16:1_22:5	1.2432	0.31401	0.16717	0.87094	-0.19935	0.1333	1.03	0.042636	0.85343		0.0658989
PE O-16:1_22:6	1.2718	0.34683	0.074455	1.0051	0.0073898	0.84211	0.95979	-0.059204	0.68421		0.0746354
PE O-18:0_16:0	0.94769	-0.077514	0.54142	0.81193	-0.30057	0.1333	0.90845	-0.13851	0.35268		0.0517506
PE O-18:0_22:4	0.95282	-0.069722	0.81481	0.75637	-0.40284	0.017212	0.99598	-0.0058071	0.79594		0.0615449
PE O-18:1_16:0	0.76621	-0.38418	0.23587	0.8973	-0.15634	0.84211	1.0527	0.07416	0.9118		0.0559007
PE O-18:1_18:2	0.89426	-0.16123	0.48071	1.1037	0.14237	0.28828	1.1323	0.17932	0.73936		0.0529627
PE O-18:1_20:4	1.3642	0.44809	0.027396	1.0046	0.0066462	0.90483	1.039	0.055249	0.9118		0.0654016
PE O-18:1_22:4	0.94223	-0.085855	0.60584	0.85053	-0.23356	0.065254	0.90736	-0.14026	0.52885		0.0640636
PE O-18:1_22:5	1.2127	0.27825	0.23587	0.96977	-0.04429	0.78019	1.0081	0.011606	0.97051		0.0638431
PE O-18:1_22:6	1.3634	0.44723	0.007898	0.99266	-0.010633	0.90483	1.045	0.063517	0.73936		0.0620232
PE O-18:2_18:1	0.88623	-0.17425	0.37038	1.0852	0.1179	0.48748	1.1033	0.14181	0.85343		0.0654168
PE O-18:2_18:2	1.0519	0.07302	0.74299	1.0674	0.094107	0.7197	1.0798	0.11083	0.85343		0.0703214
PE O-18:3_18:2	0.87411	-0.19412	0.60584	0.90862	-0.13825	0.78019	1.244	0.31502	0.73936		0.0558507
PE O-19:0_18:2	0.87996	-0.18448	0.059235	0.9686	-0.046022	0.41401	1.2276	0.2958	0.063013		0.0662566
PE O-20:0_18:1	0.96616	-0.049669	0.74299	0.86999	-0.20093	0.034987	1.2698	0.34464	0.028806		0.0511761
PE O-20:1_18:1	1.0179	0.025652	0.60584	1.076	0.10562	0.90248	1.2895	0.36681	0.27986		0.0502977
PE O-20:1_20:4	1.4727	0.55847	0.035952	1.0909	0.12556	0.1333	1.1199	0.16335	0.43587		0.0491129
PE O-20:1_22:6	1.4551	0.54109	0.0015631	0.89011	-0.16794	0.25279	1.1423	0.19199	0.24745		0.0818236
PE O-22:2_22:6	1.3648	0.44864	0.13879	0.89378	-0.162	0.66072	1.1775	0.23571	0.21756		0.0634637
PE O-38:4	1.2826	0.35911	0.092719	0.90815	-0.139	0.77496	0.99139	-0.012482	1		0.0518012
PG 14:0_16:0	0.79099	-0.33826	0.60584	0.86666	-0.20646	0.44697	0.96926	-0.045045	0.68421		0.051781
PG 14:0_18:1	0.69923	-0.51616	0.19959	0.92847	-0.10707	0.84211	1.058	0.08133	0.39305		0.0520272
PG 16:0_18:2	1.1002	0.13773	0.67297	0.87708	-0.18923	0.35623	0.93214	-0.10139	0.97051		0.104153
PG 16:0_18:2.1	0.89648	-0.15765	0.60584	1.0187	0.026729	0.7197	0.73819	-0.43793	0.028806		0.0587393
PG 18:0_18:2	0.82418	-0.27897	0.37038	0.78403	-0.35102	0.18232	0.84225	-0.24767	0.21756		0.03647
PG 18:1_18:1	1.2154	0.2814	0.074455	0.92399	-0.11405	0.90483	0.87001	-0.20089	0.63053		0.0753683
PG 18:1_18:2	1.169	0.22528	0.27659	1.0686	0.09575	0.60378	0.87878	-0.18643	0.48125		0.125588
PG 18:1_20:4	1.4697	0.55549	0.007898	1.0235	0.033483	0.84211	0.90002	-0.15197	0.97051		0.067733
PG 18:2_18:2	1.0302	0.042972	0.96257	0.83452	-0.26098	0.54896	0.97317	-0.03924	1		0.102916
PG 18:2_20:4	1.275	0.35052	0.074455	0.89983	-0.15228	0.60378	0.94662	-0.079145	0.79594		0.0610273
PG 20:4_20:4	1.378	0.46256	0.046401	0.7758	-0.36624	0.35623	0.94151	-0.086958	0.9118		0.0465823
PG 20:4_22:5	1.6064	0.68379	0.074455	0.88407	-0.17777	0.84211	1.0939	0.12946	0.68421		0.183822
PI 12:0_16:0	0.62824	-0.67062	0.046401	1.1951	0.25718	0.27751	0.66678	-0.58472	0.9118		0.0565679
PI 14:0_16:0	0.67928	-0.55793	0.046401	0.90672	-0.14126	0.4967	1.0069	0.0098771	1		0.066669
PI 14:0_18:2	0.8312	-0.26673	0.19959	1.1322	0.17909	0.78019	0.96896	-0.045489	0.97051		0.0625815
PI 14:0_20:4	1.0271	0.038592	0.67297	1.05	0.070376	0.90483	1.1491	0.20049	0.315		0.0460531
PI 16:0_14:1	0.66476	-0.58911	0.13879	1.0298	0.042304	0.60378	0.8184	-0.28912	0.68421		0.0392774
PI 16:0_16:0	0.63126	-0.66369	0.074455	0.96027	-0.058488	0.90483	0.68888	-0.53768	0.43587		0.0629802
PI 16:0_20:3	1.05	0.070389	0.60584	1.2879	0.36507	0.96824	1.4501	0.53619	0.14314		0.0893873
PI 16:0_20:4	1.2242	0.29187	0.13879	0.96069	-0.057864	1	1.111	0.15187	0.35268		0.0423757
PI 16:0_22:6	1.3842	0.46907	0.046401	0.90349	-0.14643	0.35623	1.1756	0.23338	0.43587		0.0460278
PI 16:1_18:1	0.97494	-0.036622	0.96257	1.1216	0.1655	0.60378	0.92115	-0.11849	0.73936		0.0199945
PI 17:0_20:4	1.3296	0.41101	0.02065	0.96283	-0.054646	0.90483	1.3247	0.40567	0.023231		0.0303351
PI 18:0_18:1	0.93045	-0.10399	0.81481	1.2173	0.28363	0.54896	0.9363	-0.094958	0.68421		0.111056
PI 18:0_18:2	1.0084	0.012061	0.88836	1.1546	0.20744	0.4967	0.87653	-0.19012	0.79594		0.061033
PI 18:0_20:2	0.84519	-0.24266	0.48071	1.1809	0.23993	0.90483	1.2403	0.31065	0.35268		0.0630806
PI 18:0_20:3	1.1756	0.23343	0.37038	1.1194	0.16268	1	1.6864	0.75397	0.043257		0.0511689
PI 18:0_20:4	1.3391	0.42126	0.02065	0.9239	-0.1142	0.40018	1.1544	0.20717	0.19032		0.0588558
PI 18:0_22:5	1.416	0.50186	0.035952	1.1612	0.21559	0.78019	1.221	0.28811	0.16549		0.0269702
PI 18:0_22:6	1.4048	0.49042	0.19959	0.93501	-0.096948	0.54896	1.167	0.22281	0.35268		0.0561786
PI 18:1_18:1	1.0623	0.087252	0.67297	0.96559	-0.05051	0.4967	1.1989	0.26169	0.39305		0.0476994
PI 18:1_18:2	1.0468	0.065932	0.37038	1.0292	0.041515	0.84211	0.9768	-0.033869	0.85343		0.0540702
PI 18:1_20:3	1.1779	0.23619	0.19959	1.2194	0.28622	0.66072	1.4269	0.51291	0.16549		0.0583423
PI 18:1_20:4	1.342	0.42435	0.027396	0.95657	-0.064053	0.84211	1.1609	0.21525	0.12301		0.0493272
PI 18:2_18:2	1.1465	0.19728	0.67297	1.058	0.081328	0.96824	1.0974	0.13406	0.63053		0.147192
PI 18:2_20:4	1.39	0.47507	0.13879	0.9433	-0.084205	0.66072	1.0621	0.086903	0.63053		0.0940839
PI 32:1	0.86684	-0.20617	0.60584	1.3153	0.39537	0.60378	1.01	0.014388	0.97051		0.0502988
PI 34:1	0.8023	-0.31779	0.54142	1.0661	0.09234	0.96824	0.96886	-0.045637	0.9118		0.0496108
PS 36:2	1.695	0.76131	0.32127	2.4691	1.304	0.90483	0.68583	-0.54409	0.63053		0.128588
PS 38:4	1.843	0.88209	0.54142	2.1802	1.1245	0.90483	0.68555	-0.54467	0.19032		0.0990862
PS 38:6	0.94094	-0.087832	0.81481	1.7724	0.82567	0.1333	0.70499	-0.50432	0.16549		0.0583442
SE 28:1/18:1	1.3613	0.44503	0.13879	1.1126	0.15396	1	0.98882	-0.016222	0.68421		0.0290751
SE 28:1/20:3	1.3527	0.43588	0.027396	1.2183	0.28483	0.027929	1.1631	0.218	0.35268		0.0202102
SE 28:1/20:4	1.987	0.99059	0.00016454	1.0771	0.10709	0.40018	1.0351	0.049829	0.9118		0.0248809
SE 28:1/22:6	1.1548	0.2077	0.035952	1.0753	0.10476	0.54896	1.1443	0.19452	0.21756		0.0235393
SE 28:2/20:4	1.2395	0.30975	0.074455	1.0516	0.072572	0.66072	1.0849	0.1176	0.52885		0.0329684
SE 29:1/18:2	1.1368	0.18497	0.32127	1.0005	0.00071189	1	1.0461	0.064968	0.97051		0.0308363
SE 29:1/20:4	1.5483	0.63071	0.0015631	1.0095	0.013581	0.96824	1.0166	0.023701	0.9118		0.0600816
SL 17:0;O/16:1	1.5473	0.62973	0.074455	1.1255	0.17059	1	1.6729	0.74231	0.063013		0.031121
SL 17:0;O/16:1;O	1.5076	0.59222	0.046401	1.0668	0.093228	0.84211	1.3639	0.44776	0.35268		0.0531167
SM 28:0;2O	0.90736	-0.14026	0.54142	1.0756	0.10509	0.46204	0.8067	-0.3099	0.62305		0.0634133
SM 28:1;2O	0.90487	-0.14422	0.67297	0.91031	-0.13557	0.48748	0.78711	-0.34536	0.075256		0.0529077
SM 29:1;2O	1.1917	0.253	0.42345	1.0788	0.10946	0.31538	1.0055	0.00791	0.97051		0.0626808
SM 30:0;2O	1.0758	0.10544	0.48071	1.0639	0.089301	0.4967	0.88359	-0.17854	0.68421		0.0501791
SM 30:1;2O	1.1937	0.2554	0.42345	1.1544	0.2071	0.21102	0.94526	-0.081223	0.79594		0.054541
SM 30:2;2O	1.2362	0.30592	0.54142	0.94856	-0.076194	1	0.97396	-0.038064	0.97051		0.0516598
SM 31:1;2O	1.2878	0.36492	0.059235	1.2799	0.35606	0.1564	0.98892	-0.016081	1		0.0425058
SM 32:0;2O	1.1101	0.15066	0.37038	0.9552	-0.066119	0.90483	0.91973	-0.12072	0.68421		0.0389039
SM 32:1;2O	1.2116	0.27694	0.27659	1.0619	0.086705	0.84211	0.97205	-0.040905	0.97051		0.0471011
SM 32:1;3O	1.1038	0.14253	0.37038	1.0794	0.11021	0.66072	1.0003	0.00047401	0.97051		0.0351833
SM 32:2;2O	1.3437	0.42618	0.059235	1.1841	0.2438	0.21102	1.0502	0.070705	0.52885		0.0507466
SM 33:1;2O	1.3224	0.40315	0.01522	1.0614	0.085988	0.44697	1.0454	0.064004	0.79594		0.0430119
SM 33:1;3O	1.9537	0.96622	0.0024681	1.1876	0.24811	0.1333	1.0339	0.048043	0.68421		0.0517233
SM 34:0;2O	1.2114	0.27663	0.046401	1.0135	0.019388	0.84211	0.99279	-0.010441	0.85343		0.0538064
SM 34:1;2O	1.1112	0.15207	0.42345	1.0194	0.027746	0.60378	0.9822	-0.025906	0.48125		0.0437845
SM 34:1;3O	1.0556	0.078102	0.74299	0.95309	-0.069314	0.84211	0.9829	-0.024888	0.79594		0.0525759
SM 34:2;2O	1.325	0.40594	0.027396	0.97881	-0.0309	0.96824	1.0048	0.0069352	0.97051		0.0449524
SM 34:2;3O	0.9839	-0.023414	0.74299	0.9301	-0.10454	0.40018	0.98925	-0.015586	0.85343		0.0737684
SM 35:1;2O	1.4402	0.52627	0.0015631	0.92151	-0.11793	0.84211	1.0489	0.06887	0.57874		0.0385282
SM 35:2;2O	1.4205	0.50637	0.0037022	0.95964	-0.059436	0.96824	1.0555	0.077881	0.9118		0.054643
SM 36:1;2O	1.6728	0.74226	0.0037022	0.9059	-0.14258	0.7197	0.92711	-0.10919	0.9118		0.0345299
SM 36:2;2O	1.4373	0.52341	0.027396	0.79627	-0.32866	0.21102	1.0742	0.10327	0.68421		0.0230579
SM 36:3;2O	1.354	0.43727	0.16717	0.99732	-0.00387	0.78019	1.1395	0.18837	0.19032		0.0565669
SM 37:1;2O	1.4384	0.5245	0.0055121	0.93491	-0.097095	0.78019	1.0978	0.13461	0.68421		0.0397855
SM 38:0;2O	1.5527	0.63481	0.059235	1.1891	0.2499	0.40018	1.0027	0.0039537	1		0.0380485
SM 38:1;2O	1.3816	0.46633	0.0055121	0.91523	-0.12779	0.24281	1.0128	0.018411	0.79594		0.0528615
SM 39:1;2O	1.0267	0.037999	0.81481	0.98393	-0.023367	0.84211	1.0263	0.037386	0.52885		0.0518566
SM 40:0;2O	1.2118	0.27718	0.54142	1.1238	0.16837	0.66072	1.03	0.04258	0.9118		0.04216
SM 40:0;3O	1.4575	0.54353	0.046401	1.1315	0.17829	0.54896	0.96921	-0.045113	0.52885		0.0540494
SM 40:1;2O	1.1198	0.16329	0.42345	0.92209	-0.11702	0.27751	0.96308	-0.054279	0.57874		0.042282
SM 40:2;2O	1.3698	0.45394	0.059235	1.0712	0.099264	0.4967	1.1071	0.14672	0.48125		0.0406811
SM 40:2;2O.1	1.2144	0.28029	0.027396	1.0094	0.013551	0.96824	0.95954	-0.059584	0.68421		0.0379684
SM 41:0;2O	1.3441	0.42666	0.23587	1.0885	0.12229	0.44697	1.1727	0.22986	0.48125		0.0573841
SM 41:0;3O	1.5145	0.59884	8.2271e-05	1.1243	0.16896	0.7197	1.106	0.14534	0.43587		0.0563925
SM 41:1;2O	1.2394	0.30959	0.092719	0.93008	-0.10457	0.7197	1.0161	0.023098	0.85343		0.0417422
SM 41:2;2O	1.2166	0.2829	0.074455	1.0922	0.12728	0.31538	1.0978	0.1346	0.48125		0.0477091
SM 41:2;2O.1	1.1557	0.20882	0.27659	0.97786	-0.032296	0.96824	1.0849	0.11752	0.35268		0.0479952
SM 41:3;2O	1.5108	0.59532	0.01522	1.0498	0.070169	0.60378	1.0389	0.055025	0.73936		0.041514
SM 41:6;2O	1.5346	0.61784	0.059235	0.86377	-0.21128	0.44697	1.0599	0.083987	0.27986		0.0585424
SM 42:0;2O	1.0271	0.038519	0.67297	1.1191	0.16236	0.78019	1.0082	0.011851	0.73936		0.0889516
SM 42:0;3O	1.4772	0.56287	0.035952	0.93661	-0.094487	0.24281	0.95953	-0.059595	0.73936		0.0492112
SM 42:1;2O	1.1404	0.18951	0.32127	0.99462	-0.0077831	0.96824	1.0286	0.040749	0.85343		0.048242
SM 42:1;3O	1.4305	0.51655	0.00098725	1.0557	0.078143	0.7197	1.1404	0.18959	0.14314		0.0453664
SM 42:2;2O	1.072	0.10032	0.60584	1.0516	0.072534	0.44697	1.0534	0.075039	0.63053		0.0376917
SM 42:3;2O	1.1111	0.15204	0.16717	1.0094	0.013529	0.7197	0.9693	-0.044977	0.63053		0.0370415
SM 42:3;3O	1.4369	0.52293	0.059235	1.2409	0.31137	0.078893	0.82929	-0.27006	0.39305		0.0427352
SM 42:5;2O	2.4771	1.3086	0.035952	0.99383	-0.0089281	0.96824	1.1911	0.25234	0.19032		0.0394967
SM 43:1;2O	0.87832	-0.18718	0.88836	1.0089	0.012784	1	1.0177	0.025266	0.68421		0.0638773
SM 43:2;2O	1.1197	0.16312	0.27659	0.93638	-0.094829	0.4967	1.2125	0.27797	0.063013		0.0421132
SM 43:3;2O	1.6165	0.69286	0.027396	0.87581	-0.19131	0.35623	1.2705	0.34545	0.12301		0.0614438
SM 44:1;2O	1.1868	0.24707	0.48071	1.175	0.23267	0.44697	1.0045	0.0064464	1		0.0370599
SM 44:2;2O	1.0963	0.13265	0.48071	1.2159	0.28201	0.21102	1.1138	0.15554	0.73936		0.0505005
SM 44:3;2O	1.09	0.1243	0.67297	0.98793	-0.017515	0.96824	1.045	0.063495	0.57874		0.0460383
SM 44:5;2O	1.5555	0.63736	0.67297	0.96023	-0.058547	0.84211	0.96799	-0.046937	0.97051		0.0745761
SM 46:6;2O	1.6152	0.69168	0.074455	0.99434	-0.0081903	0.96824	0.89176	-0.16527	0.16549		0.0409074
ST 27:1;O;S	1.1587	0.21256	0.23587	0.89887	-0.15381	1	0.92492	-0.11259	0.43587		0.0889453
ST 28:1;O;S	1.4549	0.54088	0.01522	1.0646	0.090379	0.27751	1.0224	0.031901	0.97051		0.0247802
ST 28:2;O;S	1.4994	0.58443	0.0055121	1.0688	0.095981	0.18232	1.0009	0.0013453	0.97051		0.0237553
ST 29:1;O;S	1.5537	0.63575	0.059235	0.94013	-0.089074	0.90483	1.0425	0.060094	0.79594		0.0259158
TG 12:0_16:0_22:6	0.79482	-0.33131	0.37038	0.9074	-0.14019	1	0.87817	-0.18742	0.73936		0.0213417
TG 12:0_18:2_20:4	0.41015	-1.2858	0.11394	1.0635	0.088847	0.7197	0.99602	-0.0057509	0.9118		0.0248319
TG 14:0_16:0_22:6	0.72282	-0.4683	0.32127	1.0234	0.03337	0.84211	0.95955	-0.059565	0.68421		0.0212039
TG 16:0_17:0_18:1	0.5222	-0.93733	0.074455	1.1252	0.17023	0.96824	0.82382	-0.2796	0.21756		0.0153456
TG 16:0_18:1_22:6	0.70256	-0.50931	0.23587	0.85464	-0.22662	1	1.2497	0.32158	0.52885		0.023644
TG 16:0_18:2_20:4	0.59047	-0.76007	0.11394	0.99857	-0.0020593	0.60378	1.0493	0.069456	0.85343		0.0225874
TG 17:1_18:2_18:2	0.58458	-0.77452	0.035952	0.87331	-0.19543	0.84211	0.97992	-0.029266	0.43587		0.0239756
TG 18:1_18:2_23:0	0.64567	-0.63113	0.27659	1.1637	0.21868	0.54896	0.9767	-0.034017	0.73936		0.044084
TG 18:2_18:2_23:0	0.42189	-1.245	0.059235	1.1652	0.22062	0.54896	0.99266	-0.010627	0.52885		0.0275153
TG 18:2_18:3_18:3	0.66122	-0.5968	0.13879	1.1132	0.15477	0.44697	1.752	0.80897	0.075256		0.0478363
TG 32:0	0.64924	-0.62317	0.23587	0.58759	-0.76712	1	0.60408	-0.72718	0.87969		0.258469
TG 34:0	0.6961	-0.52264	0.32127	0.65332	-0.61413	0.60378	0.36012	-1.4734	0.79594		0.0242842
TG 35:0	0.60399	-0.72741	0.16717	1.0662	0.092445	0.71306	0.99797	-0.0029303	0.96984		0.0525344
TG 36:0	0.73005	-0.45393	0.37038	0.49001	-1.0291	0.7197	0.39668	-1.3339	0.93972		0.049249
TG 37:0	0.65723	-0.60553	0.27659	1.3598	0.4434	0.90483	0.63945	-0.64509	0.15077		0.0260311
TG 38:0	0.73365	-0.44683	0.27659	0.42751	-1.226	0.84211	0.48896	-1.0322	0.9118		0.0324101
TG 38:1	0.61711	-0.6964	0.059235	0.39246	-1.3494	0.31538	0.52171	-0.93868	0.4055		0.0247119
TG 39:0	0.70308	-0.50824	0.32127	1.151	0.20295	0.96824	0.52083	-0.94112	0.38449		0.0415533
TG 40:0	0.73835	-0.43762	0.42345	0.75159	-0.41197	0.84211	0.66283	-0.59328	0.85343		0.0214683
TG 40:2	0.71745	-0.47905	0.42345	0.86745	-0.20514	0.60378	0.6296	-0.6675	0.59656		0.0224573
TG 40:3	0.62675	-0.67405	0.23587	2.0998	1.0703	0.60378	1.5177	0.60187	0.52037		0.0726768
TG 41:0	0.79629	-0.32864	1	1.0601	0.084173	0.80641	0.76484	-0.38677	0.49613		0.0540371
TG 41:1	0.69127	-0.53267	0.37038	0.724	-0.46593	0.7197	0.66503	-0.5885	0.68421		0.0293239
TG 41:2	0.68205	-0.55205	0.42345	0.98273	-0.025135	0.96824	0.78333	-0.3523	0.57046		0.0386902
TG 42:0	0.81359	-0.29762	0.67297	0.93937	-0.090241	0.7197	0.89613	-0.15822	0.9118		0.0357009
TG 42:1	0.67775	-0.56117	0.11394	0.59456	-0.75011	0.84211	0.80384	-0.31502	0.90969		0.0887957
TG 42:2	0.76866	-0.37959	0.42345	0.71825	-0.47744	0.66072	0.63752	-0.64945	0.57061		0.0178092
TG 43:0	0.5461	-0.87275	0.092719	0.67773	-0.56123	0.40018	0.6922	-0.53073	0.52885		0.0200081
TG 43:1	0.61574	-0.6996	0.23587	0.63494	-0.65531	0.54896	0.82225	-0.28236	0.93972		0.0190494
TG 43:2	0.61458	-0.70233	0.23587	1.0546	0.076763	0.96824	0.78363	-0.35176	0.48125		0.0474981
TG 44:0	0.85136	-0.23215	0.74299	0.82492	-0.27768	0.54896	0.75461	-0.40619	0.79126		0.0150161
TG 44:1	0.71359	-0.48683	0.37038	1.0166	0.023701	0.96824	0.84831	-0.23734	0.57061		0.0291307
TG 44:2	0.64368	-0.63559	0.16717	1.0054	0.0077562	0.60378	0.84545	-0.2422	0.85005		0.0118497
TG 44:3	1.081	0.11232	0.42345	1.0819	0.11356	0.44697	0.63281	-0.66015	0.053812		0.0270896
TG 45:1	0.64144	-0.6406	0.13879	0.85626	-0.22387	0.21102	0.96333	-0.053894	0.93972		0.0177589
TG 45:2	0.59184	-0.75672	0.092719	0.82577	-0.27619	0.66072	0.99403	-0.0086452	0.93972		0.0187345
TG 46:0	0.86402	-0.21087	0.81481	1.1092	0.14953	0.84211	0.84611	-0.24108	1		0.0112227
TG 46:1	0.64235	-0.63857	0.19959	1.6134	0.69014	0.84211	0.75264	-0.40997	0.49613		0.0199349
TG 46:3	0.73236	-0.44938	0.42345	1.0399	0.056505	0.44697	0.83294	-0.26372	0.44952		0.0320089
TG 46:5	0.79023	-0.33965	0.37038	1.1886	0.24923	0.66072	0.55258	-0.85576	0.18571		0.0360924
TG 46:6	1.1678	0.22383	1	0.84373	-0.24515	0.83819	0.53848	-0.89304	0.38449		0.0211418
TG 47:1	0.61783	-0.69472	0.13879	1.1569	0.21024	0.78019	0.83091	-0.26724	0.57874		0.0203222
TG 47:2	0.576	-0.79585	0.19959	0.93611	-0.095256	0.31538	0.88195	-0.18124	0.57874		0.0210446
TG 47:3	0.54332	-0.88013	0.074455	0.95925	-0.060022	0.7197	0.82702	-0.27401	0.315		0.0618975
TG 47:5	0.54609	-0.87278	0.19959	1.09	0.12432	0.48729	0.95065	-0.073014	0.67713		0.0627058
TG 48:0	0.72191	-0.4701	0.37038	1.1981	0.26075	0.34753	0.88478	-0.17662	0.68421		0.015676
TG 48:1	0.61291	-0.70626	0.074455	1.469	0.5548	0.78019	0.75619	-0.40318	0.19032		0.0120374
TG 48:6	1.0292	0.041554	0.81481	1.0307	0.043656	0.62405	0.70621	-0.50182	0.24114		0.0233909
TG 49:1	0.63602	-0.65286	0.13879	1.152	0.20413	0.90483	0.88787	-0.17158	0.48125		0.012851
TG 49:3	0.54616	-0.87261	0.13879	1.0782	0.10862	0.90483	0.87255	-0.19669	0.24745		0.0202624
TG 50:0	0.63877	-0.64663	0.19959	1.0011	0.0016145	0.54896	0.98604	-0.02028	0.97051		0.0145506
TG 50:1	0.73646	-0.44133	0.046401	1.0567	0.079533	0.4967	1.0814	0.11288	0.17346		0.0173038
TG 50:2	0.7313	-0.45147	0.035952	1.146	0.19659	0.78019	0.84412	-0.24447	0.14032		0.00838003
TG 50:3	0.7428	-0.42896	0.37038	1.1955	0.25758	0.7197	0.83082	-0.2674	0.12301		0.0138201
TG 50:5	0.47359	-1.0783	0.074455	1.0791	0.10978	0.54896	1.0577	0.080917	0.76228		0.0282319
TG 51:1	0.5222	-0.93733	0.074455	1.1252	0.17023	0.96824	0.82382	-0.2796	0.21756		0.0153456
TG 51:2	0.63691	-0.65085	0.092719	1.0682	0.095247	0.84211	0.87158	-0.1983	0.43587		0.0126052
TG 51:3	0.55824	-0.84105	0.059235	0.97652	-0.034283	0.78019	0.89456	-0.16076	0.39305		0.0149329
TG 51:4	0.4286	-1.2223	0.01522	0.86607	-0.20745	0.90483	0.9881	-0.017277	0.57874		0.0258216
TG 51:5	0.45085	-1.1493	0.16717	1.0208	0.029656	0.78019	0.91785	-0.12366	0.43587		0.098851
TG 52:0	0.66522	-0.58809	0.32127	0.98154	-0.026875	0.44697	0.99208	-0.011476	0.9118		0.0090176
TG 52:1	0.52846	-0.92014	0.092719	1.1478	0.19887	0.78019	0.74542	-0.42388	0.21756		0.0219746
TG 52:5	0.53285	-0.90819	0.11394	1.049	0.068965	0.78019	1.1434	0.19339	0.35268		0.0926295
TG 52:6	0.60913	-0.71517	0.27659	1.182	0.24124	0.66072	0.90431	-0.14512	0.68421		0.0128145
TG 52:6.1	0.6631	-0.59271	0.48071	0.84289	-0.24659	0.78019	1.1488	0.20013	0.39305		0.0207419
TG 52:7	0.47645	-1.0696	0.32127	0.8651	-0.20906	0.84211	1.2247	0.29245	0.35268		0.128877
TG 53:1	0.55334	-0.85377	0.11394	0.94083	-0.087994	0.96824	0.90654	-0.14155	0.97051		0.0163633
TG 53:2	0.51255	-0.96423	0.02065	1.0294	0.041824	0.96824	0.8005	-0.32103	0.25666		0.0240109
TG 53:3	0.68421	-0.54748	0.16717	0.95347	-0.068744	0.78019	0.85436	-0.22709	0.15077		0.0138327
TG 53:4	0.6312	-0.66384	0.011107	0.86695	-0.20597	0.84211	0.93161	-0.1022	0.39305		0.0155073
TG 53:5	0.59168	-0.75712	0.035952	0.87343	-0.19523	0.84211	0.62286	-0.68302	0.028806		0.0246183
TG 54:0	0.67211	-0.57324	0.19959	1.0255	0.036384	0.54896	0.88599	-0.17464	0.315		0.0301287
TG 54:1	0.55923	-0.83848	0.13879	1.0921	0.12713	0.4967	0.72031	-0.47331	0.21212		0.0308033
TG 54:2	0.54175	-0.8843	0.027396	1.0139	0.01985	0.78019	0.7144	-0.48519	0.12301		0.0148324
TG 54:3	0.90453	-0.14477	0.23587	0.95595	-0.064997	0.96824	0.84232	-0.24756	0.075256		0.0416189
TG 54:4	0.66471	-0.58921	0.02065	0.94851	-0.076269	0.90483	0.76762	-0.38153	0.063013		0.0115471
TG 54:5	0.60366	-0.72818	0.059235	1.1095	0.14993	0.60378	0.93704	-0.093812	0.24114		0.0261417
TG 54:7	0.40893	-1.2901	0.059235	0.89046	-0.16737	1	0.82665	-0.27465	0.39305		0.0237034
TG 54:8	0.40359	-1.309	0.074455	0.6545	-0.61155	0.96824	1.2029	0.26655	0.28974		0.0281151
TG 55:1	0.67121	-0.57515	0.23587	0.94276	-0.085036	1	0.92319	-0.1153	0.65002		0.0177209
TG 55:2	0.53857	-0.89279	0.02065	0.9668	-0.048709	0.66072	0.83376	-0.26229	0.52885		0.0167046
TG 55:3	0.56024	-0.83588	0.01522	0.97008	-0.043832	0.90483	0.98348	-0.024031	0.70535		0.0153222
TG 55:4	0.65871	-0.60227	0.027396	0.94698	-0.07859	0.66072	0.86274	-0.213	0.19032		0.0145081
TG 55:5	0.70899	-0.49615	0.02065	1.029	0.041273	0.66072	0.94769	-0.077519	0.57874		0.0195258
TG 55:6	0.67274	-0.57188	0.13879	1.1042	0.143	0.60378	1.0468	0.065946	0.49613		0.0523231
TG 56:1	0.70035	-0.51385	0.32127	0.98683	-0.019121	0.78019	0.6404	-0.64296	0.063013		0.0120326
TG 56:10	0.52525	-0.92892	0.27659	0.99918	-0.0011816	0.84211	1.1244	0.16916	0.59656		0.0311529
TG 56:2	0.48889	-1.0324	0.035952	1.1897	0.25058	0.31538	0.66645	-0.58542	0.13043		0.262732
TG 56:3	0.5447	-0.87647	0.0037022	1.0379	0.053681	0.60378	0.70891	-0.49632	0.15077		0.0209782
TG 56:5	1.0235	0.033463	0.67297	0.9867	-0.019312	0.84211	0.87902	-0.18603	0.65002		0.0284075
TG 56:9	0.48629	-1.0401	0.23587	0.8397	-0.25205	0.78019	1.1784	0.23685	0.25666		0.0229548
TG 57:1	0.72695	-0.46008	0.11394	0.91303	-0.13126	0.90483	0.79895	-0.32383	0.35268		0.101669
TG 57:2	0.53763	-0.89533	0.059235	1.032	0.04544	0.66072	0.83864	-0.25388	0.73363		0.0177069
TG 57:3	0.67746	-0.5618	0.092719	0.93234	-0.10108	0.90483	0.81597	-0.29341	0.52885		0.0647622
TG 57:4	0.61199	-0.70842	0.074455	1.0602	0.084302	0.7197	0.72811	-0.45777	0.30731		0.073786
TG 57:6	0.67617	-0.56453	0.046401	1.0759	0.10552	0.7197	0.98153	-0.026889	0.63053		0.0201014
TG 57:7	0.81056	-0.30301	0.32127	0.95051	-0.073229	0.96824	0.94313	-0.084467	0.70535		0.0334799
TG 57:8	0.69992	-0.51474	0.23587	0.79475	-0.33143	0.96824	1.0983	0.13531	0.59656		0.0334027
TG 57:9	0.90927	-0.13722	0.81481	0.87289	-0.19612	0.78019	0.88489	-0.17643	0.44952		0.0292734
TG 58:1	0.73472	-0.44474	0.32127	1.1612	0.21565	0.44697	0.66548	-0.58753	0.16549		0.177764
TG 58:10	0.42269	-1.2423	0.11394	0.83715	-0.25645	0.84211	1.2038	0.2676	0.39305		0.0242886
TG 58:12	0.7695	-0.37801	0.23587	0.99851	-0.0021445	0.78019	1.2407	0.31119	0.49613		0.0288523
TG 58:2	0.46174	-1.1149	0.059235	1.2347	0.30421	0.35623	0.65956	-0.60043	0.21212		0.265928
TG 58:3	0.43286	-1.208	0.01522	1.5054	0.59019	0.1333	0.54854	-0.86633	0.043257		0.0400411
TG 58:4	0.46564	-1.1027	0.011107	1.2913	0.36877	0.24281	0.61226	-0.70779	0.063922		0.0596353
TG 58:5	0.55953	-0.83772	0.00098725	1.2313	0.30013	0.40018	0.66354	-0.59175	0.028306		0.0329906
TG 58:6	0.71023	-0.49364	0.13879	1.0366	0.051879	0.66072	0.78103	-0.35656	0.14314		0.0430745
TG 58:7	0.78912	-0.34169	0.074455	1.0405	0.057331	0.4967	0.86036	-0.21699	0.47251		0.0575167
TG 58:8	0.72179	-0.47034	0.54142	0.93384	-0.098749	0.78019	0.96166	-0.056403	0.62305		0.0207856
TG 59:1	0.81923	-0.28765	0.67297	0.8701	-0.20075	0.84211	0.78491	-0.3494	0.57874		0.0143382
TG 59:2	0.69661	-0.52157	0.16717	0.87058	-0.19995	0.78019	0.75386	-0.40763	0.36417		0.0187915
TG 59:5	0.46529	-1.1038	0.0037022	1.0641	0.089683	0.4967	0.75898	-0.39788	0.59656		0.0442809
TG 59:7	0.74293	-0.4287	0.11394	1.0083	0.011897	0.96824	1.0132	0.018871	0.97051		0.0662214
TG 60:1	0.57182	-0.80637	0.19959	1.0332	0.047075	0.66072	0.68081	-0.55467	0.35268		0.121529
TG 60:10	0.78751	-0.34462	0.60584	1.0869	0.12016	0.35623	0.99622	-0.0054622	0.93972		0.0421401
TG 60:2	0.57905	-0.78825	0.16717	1.1504	0.2022	0.44697	0.62672	-0.67411	0.16181		0.0195336
TG 60:3	0.62637	-0.67491	0.19959	1.1643	0.21948	0.7197	0.44125	-1.1803	0.035463		0.0268231
TG 60:4	0.4064	-1.299	0.01522	1.362	0.44567	0.1564	0.60496	-0.72508	0.075256		0.0205037
TG 60:5	0.4813	-1.055	0.00057589	1.5108	0.59528	0.21102	0.57948	-0.78716	0.096179		0.0219009
TG 60:6	0.45236	-1.1444	0.00098725	0.96385	-0.053114	0.84211	0.54656	-0.87156	0.16181		0.0276023
TG 60:7	0.66838	-0.58125	0.059235	0.84448	-0.24387	0.96824	0.67955	-0.55735	0.08921		0.0140414
TG 60:8	0.71454	-0.48492	0.11394	0.88962	-0.16873	1	0.74596	-0.42282	0.18571		0.0384848
TG 60:9	0.73455	-0.44507	0.19959	1.0351	0.049778	0.60378	0.92982	-0.10498	0.39305		0.019259
TG 61:1	0.74752	-0.41981	0.37038	0.84485	-0.24324	0.84211	0.8269	-0.27421	0.73936		0.0169535
TG 61:2	0.55998	-0.83654	0.092719	1.0807	0.11201	0.84211	0.85604	-0.22425	0.73363		0.0108842
TG 61:3	0.66653	-0.58526	0.19959	1.1508	0.20265	0.40018	0.71358	-0.48686	0.48125		0.0784273
TG 62:10	0.60301	-0.72976	0.11394	1.1783	0.23665	0.35623	0.77577	-0.3663	0.14032		0.0326415
TG 62:11	0.7735	-0.37053	0.42345	1.0846	0.11715	0.66072	0.88797	-0.17142	0.73936		0.0138922
TG 62:13	0.78271	-0.35345	0.54142	0.77821	-0.36176	0.60378	1.0566	0.079461	0.85005		0.0310373
TG 62:14	0.79548	-0.3301	0.23587	0.74785	-0.41917	0.24281	1.7691	0.82301	0.028306		0.0194057
TG 62:2	0.60636	-0.72176	0.19959	1.1125	0.15378	0.60378	0.92366	-0.11457	0.70535		0.0316477
TG 62:3	0.54663	-0.87137	0.092719	1.2864	0.36334	0.31538	0.69278	-0.52953	0.44952		0.0755859
TG 62:4	0.36417	-1.4573	0.046401	1.6621	0.73298	0.043474	0.64842	-0.625	0.25666		0.0491833
TG 62:8	0.64968	-0.6222	0.092719	0.89725	-0.15641	0.96824	0.58605	-0.77092	0.041174		0.0200232
TG 62:9	0.68119	-0.55387	0.059235	1.1607	0.21504	0.21102	0.72584	-0.46227	0.08921		0.0155849
TG 64:1	0.6147	-0.70205	0.19959	1.0344	0.0488	0.60378	0.8383	-0.25446	0.70535		0.228628
TG 64:10	0.70507	-0.50416	0.13879	1.1258	0.17099	0.35623	0.71746	-0.47903	0.19032		0.0364282
TG 64:11	0.81596	-0.29343	0.092719	1.0496	0.069852	0.4967	0.75419	-0.407	0.34452		0.0296104
TG 64:12	0.73107	-0.45192	0.23587	0.98404	-0.023205	0.7197	0.75066	-0.41377	0.24745		0.0293948
TG 64:13	0.83002	-0.26878	0.67297	0.86438	-0.21027	0.90483	0.924	-0.11403	0.9397		0.0258404
TG 64:14	0.44159	-1.1792	0.11394	0.7787	-0.36087	0.40018	1.0184	0.026336	0.67747		0.0173276
TG 64:16	0.78932	-0.34131	0.60584	0.8162	-0.29301	0.40018	1.5676	0.64858	0.075256		0.0582994
TG 64:2	0.55711	-0.84397	0.13879	1.1515	0.20352	0.44697	0.8038	-0.3151	0.59656		0.0186699
TG 64:3	0.56791	-0.81628	0.092719	0.95969	-0.059365	0.84211	0.84432	-0.24413	0.49613		0.0226105
TG 64:4	0.49347	-1.019	0.11394	1.1914	0.25266	0.66072	0.76021	-0.39554	0.48125		0.0192123
TG 66:2	0.52655	-0.92535	0.092719	1.1774	0.23559	0.54896	1.0136	0.019468	1		0.0314432
TG 66:4	0.69651	-0.52178	0.60584	1.0936	0.12914	0.90483	0.87466	-0.19321	0.70535		0.0256491
TG 66:5	0.47242	-1.0819	0.16717	1.1303	0.17673	0.4967	0.80746	-0.30853	0.79594		0.0167417
TG 67:4	0.36184	-1.4666	0.092719	0.87968	-0.18494	0.78019	0.82668	-0.27459	0.65002		0.0402902
TG 68:1	0.5676	-0.81705	0.13879	0.92563	-0.1115	0.78019	1.1707	0.22737	0.57874		0.283996
TG 68:2	0.48858	-1.0333	0.13879	1.1396	0.1885	0.54896	1.0857	0.11859	0.93972		0.0143827
TG 68:3	0.51946	-0.94491	0.13879	1.0411	0.058114	0.60378	1.0446	0.062963	0.87978		0.0317799
TG 68:4	0.52227	-0.93714	0.19959	1.0412	0.05829	0.7197	0.98511	-0.021648	0.93972		0.0260313
TG 68:5	0.48646	-1.0396	0.32127	1.0958	0.13195	0.4967	0.96001	-0.058878	0.93972		0.0602634
TG 68:6	0.53947	-0.89038	0.23587	1.4235	0.50943	0.40018	0.80816	-0.30729	0.49613		0.020425
TG 70:2	0.50744	-0.97868	0.074455	1.168	0.224	0.60378	1.091	0.1256	0.85343		0.0218771
TG 70:3	0.5267	-0.92495	0.046401	1.2232	0.29069	0.31538	1.0202	0.028799	1		0.0158073
TG 70:4	0.51959	-0.94456	0.059235	0.96494	-0.051494	0.54896	0.89969	-0.1525	0.43587		0.0278346
TG 70:5	0.39454	-1.3418	0.046401	1.0297	0.042259	0.4967	0.9558	-0.065215	0.87978		0.0260103
TG 70:6	0.49123	-1.0255	0.32127	1.0537	0.075503	0.66072	0.92556	-0.11161	0.76228		0.0290889
TG 72:5	0.48323	-1.0492	0.046401	1.4267	0.51264	0.24281	1.0311	0.044187	0.59656		0.0524297
TG O-18:0_16:0_18:2	0.28519	-1.81	0.074455	1.3459	0.42854	0.078893	0.62422	-0.67986	0.24745		0.0612349
TG O-22:0_18:0_18:1	0.43876	-1.1885	0.059235	0.96835	-0.046398	0.96824	0.90506	-0.14391	1		0.0181156
TG O-22:1_18:1_18:2	0.74872	-0.4175	0.37038	1.3596	0.44323	0.27751	0.64608	-0.63021	0.24745		0.0204084
TG O-46:0	0.18376	-2.4441	0.0055121	1.0408	0.057659	0.84211	0.60802	-0.71781	0.10512		0.0189788
TG O-48:0	0.19497	-2.3587	0.007898	0.90585	-0.14265	0.7197	0.68816	-0.53919	0.315		0.0150985
TG O-48:1	0.22533	-2.1499	0.02065	1.0031	0.004489	0.7197	0.64615	-0.63006	0.14314		0.0131714
TG O-50:0	0.25926	-1.9475	0.011107	1.0101	0.014541	0.54896	0.76716	-0.3824	0.43587		0.0270228
TG O-50:1	0.25102	-1.9941	0.027396	0.99483	-0.0074808	0.7197	0.64317	-0.63673	0.16181		0.133245
TG O-50:2	1.1632	0.21805	0.74299	1.1227	0.167	0.31538	0.7405	-0.43342	0.44952		0.109756
TG O-52:0	0.35106	-1.5102	0.035952	0.9702	-0.043641	1	0.89968	-0.15251	0.97051		0.0250378
TG O-54:1	0.30844	-1.697	0.0055121	1.0254	0.036248	0.60378	0.68982	-0.5357	0.48125		0.0265587
TG O-54:2	0.34215	-1.5473	0.046401	1.1317	0.1785	0.44697	0.69942	-0.51576	0.315		0.019017
TG O-56:1	0.65368	-0.61334	0.96257	1.1131	0.1546	0.60378	0.81478	-0.29552	0.68421		0.0177132
TG O-56:2	0.43972	-1.1853	0.074455	1.0574	0.080534	0.4967	0.7066	-0.50104	0.4055		0.0196891
TG O-56:4	0.42447	-1.2363	0.035952	1.2383	0.30832	0.1564	0.7062	-0.50185	0.28974		0.100878
TG O-58:3	0.49762	-1.0069	0.27659	1.1442	0.19431	0.4967	0.6472	-0.62771	0.27286		0.0295766
TG O-60:2	0.47791	-1.0652	0.11394	1.0732	0.10189	0.96824	0.821	-0.28454	0.9118		0.0233958
