# Supplementary material for: Diet modulates the therapeutic effects of dimethyl fumarate mediated by the immunometabolic neutrophil receptor HCAR2
Source: eLife. 2025 Apr 23;14:e98970. doi: 10.7554/eLife.98970 (PMC12113270; doi:10.7554/eLife.98970)
Supplement: Supplementary file 4. [file elife-98970-supp4.xlsx]

## Sheet: Supplementary File 4
	Quality control
Metabolite	CV%
1-Methylhistidine	0.0150703
3-(4-Hydroxyphenyl)lactate	0.060018
3-Hydroxy-3-methylglutarate	0.0249667
3-Methylhistidine	0.00980969
7-Methylguanine	0.0229988
Adenosinemonophosphate	0.0612432
Alanine	0.0122982
Allantoin	0.0105046
Amino(iso)butyric acid	0.0300514
Aminoadipate	0.0118791
Anserine	0.0249451
Arginine	0.00845598
Asparagine	0.0124818
Aspartate	0.0233882
C6H12O6	0.00604774
C6H12O7 sugar acid	0.198018
Carnosine	0.0168827
Citrulline	0.0297832
Creatine	0.0224537
Creatinine	0.0143001
Cysteine-S-sulfate	0.0115956
Decanoylcarnitine	0.0245159
Deoxycarnitine	0.0188021
Dimethylarginine	0.0426718
Equol	0.0249496
Ferulate	0.0196436
Glutamine	0.0116438
Glutamyl-glutamine	0.00686215
Glutamylleucine	0.0151381
Glycerolphosphate	0.0388125
Glycerophosphocholine	0.0887064
Glycine	0.0126254
Glycitein	0.0204015
Glycolate	0.0144289
Histamine	0.0104987
Histidine	0.0135849
Hydroxybutanoate	0.0419107
Hydroxyglutaric acid	0.0345834
Hydroxyhexadecanoic acid	0.0407909
Hydroxyhippuric acid	0.0243874
Hydroxyproline	0.0302393
Indolelactic acid	0.0420722
Indoxyl sulfate	0.0120739
Isoleucine	0.0293963
Ketamine	0.0166149
Kynurenic acid	0.0255659
Kynurenine	0.0169204
Lactate	0.02322
Lauroylcarnitine	0.0354669
Leucine	0.0118481
Lysine	0.0244327
Malate	0.178404
Maleamic acid	0.273943
Methionine sulfoxide	0.0157439
N1-Acetylspermidine	0.0581118
N8-Acetylspermidine	0.0489817
N-Acetylaspartic acid	0.0231923
N-Acetylglutamic acid	0.0200376
N-Acetylserine	0.024497
N-Acetyltyrosine	0.0262321
Nicotinamide 1-oxide	0.0296425
Octanoylcarnitine	0.025801
Ornithine	0.0181768
Oxoadipate	0.0262226
Oxoglutaric acid	0.00989921
Palmitoylcarnitine	0.0344566
Pantothenic acid	0.0214268
Phenylalanine	0.0113102
Phosphocholine	0.0266411
Proline	0.0136564
Prolylleucine	0.0228017
Pseudouridine	0.0107236
Pyruvate	0.0281155
Serine	0.0113067
Sphingosine (d18:1)	0.0357209
Sphingosine-1-phosphate	0.0732264
Succinate	0.041412
Taurine	0.0168998
Thiamine	0.0184439
Threonine	0.0157589
Thymidine	0.0434298
Trimethyllysine	0.0275227
Tryptophan	0.0208587
Tyrosine	0.0225408
Uracil	0.0162413
Urate	0.00675121
Urea	0.0195608
Ureidopropionic acid	0.0346024
Uridine	0.0345369
Urocanate	0.0168917
Valine	0.00968353
